# Supplementary material for: Publicly available apps for cancer survivors: a scoping review
Source: PubMed Central journal article supplement — BMJ Open. 2019 Sep 30;9(9):e032510. doi: 10.1136/bmjopen-2019-032510 (PMC6773350; doi:10.1136/bmjopen-2019-032510), 2019-09-30
Supplement: bmjopen-2019-032510.draft_revisions.pdf [file bmjopen-2019-032510.draft_revisions.pdf]

# BMJ Open

BMJ Open is committed to open peer review. As part of this commitment we make the peer review history of every article we publish publicly available.

When an article is published we post the peer reviewers' comments and the authors' responses online. We also post the versions of the paper that were used during peer review. These are the versions that the peer review comments apply to.

The versions of the paper that follow are the versions that were submitted during the peer review process. They are not the versions of record or the final published versions. They should not be cited or distributed as the published version of this manuscript.

BMJ Open is an open access journal and the full, final, typeset and author-corrected version of record of the manuscript is available on our site with no access controls, subscription charges or pay-per-view fees (<http://bmjopen.bmj.com>).

If you have any questions on BMJ Open's open peer review process please email [info.bmjopen@bmj.com](mailto:info.bmjopen@bmj.com)

# BMJ Open

## Publicly available apps for Cancer Survivors: a scoping review

|                               |                                                                                                                                                                                                                                                                                                                                                                                                                               |
|-------------------------------|-------------------------------------------------------------------------------------------------------------------------------------------------------------------------------------------------------------------------------------------------------------------------------------------------------------------------------------------------------------------------------------------------------------------------------|
| Journal:                      | <i>BMJ Open</i>                                                                                                                                                                                                                                                                                                                                                                                                               |
| Manuscript ID                 | bmjopen-2019-032510                                                                                                                                                                                                                                                                                                                                                                                                           |
| Article Type:                 | Research                                                                                                                                                                                                                                                                                                                                                                                                                      |
| Date Submitted by the Author: | 21-Jun-2019                                                                                                                                                                                                                                                                                                                                                                                                                   |
| Complete List of Authors:     | Adam, Rosalind; University of Aberdeen College of Life Sciences and Medicine, Academic Primary Care<br>McMichael, Drew; University of Aberdeen College of Life Sciences and Medicine, Academic Primary Care<br>Powell, Daniel; University of Aberdeen, Aberdeen Health Psychology Group, Institute of Applied Health Sciences, Rowett Institute<br>Murchie, Peter; University of Aberdeen, Division of Applied Health Science |
| Keywords:                     | ONCOLOGY, Health informatics < BIOTECHNOLOGY & BIOINFORMATICS, Information technology < BIOTECHNOLOGY & BIOINFORMATICS, Telemedicine < BIOTECHNOLOGY & BIOINFORMATICS, World Wide Web technology < BIOTECHNOLOGY & BIOINFORMATICS                                                                                                                                                                                             |
|                               |                                                                                                                                                                                                                                                                                                                                                                                                                               |

SCHOLARONE™  
Manuscripts

## Publically available apps for Cancer Survivors: a scoping review

Corresponding author: Rosalind Adam. Academic Primary Care, Institute of Applied Health Sciences, University of Aberdeen, Room 1:020, Polwarth Building, Foresterhill, Aberdeen, UK. AB25 2ZD.

Email [rosalindadam@abdn.ac.uk](mailto:rosalindadam@abdn.ac.uk).

Telephone +44 (0)1224 437906.

Fax +44 (0)1224 437971.

Drew McMichael, Medical Student, University of Aberdeen, UK

Daniel Powell, Aberdeen Health Psychology Group, Institute of Applied Health Sciences, University of Aberdeen, Aberdeen, UK; Rowett Institute, University of Aberdeen, Aberdeen, UK

Peter Murchie. Academic Primary Care, Institute of Applied Health Sciences, University of Aberdeen, UK.

**Word Count** = 4,717

## Abstract

**Objectives:** To review the nature and scope of apps targeting individuals living with and beyond cancer.

**Design:** Scoping review, searching the two largest app stores, Google Play, and Apple's App store. App descriptions were exported verbatim, and summarised descriptively, thematically, and by content coding.

**Results:** We included 151 apps targeting individuals living with and beyond cancer. Most targeted all cancer types (n=89, 58.9%) or breast cancer (n=22, 14.6%), and originated in the USA (n=68, 45.0%). The country of origin was unclear for 31 (20.5%) apps. Most apps were developed by commercial/private concerns (n=64, 43%) or non-profit organisations (n=30, 19.9%) and marketed apps in terms of fighting metaphors, navigating a journey, and becoming empowered to take control.

App content could be summarised under five main categories: 1. Imparting information about cancer 2. Planning and organising cancer care 3. Interacting with others (including others affected by cancer, and healthcare professionals) 4. Enacting management strategies, and adjusting to life with or beyond cancer 5. Getting feedback about cancer management, for example, by sharing self-monitoring reports with professionals. We found some apps describing "cures" for cancer, or selling products such as alkaline waters to cancer survivors.

**Conclusions:** Apps are currently available via online stores that cover a large spectrum of cancer survivorship activities. The effects of such apps on clinical consultations, patient work/burden, and clinical outcomes merit further attention. Most apps are developed by commercial organisations, and promises of empowerment in the "fight" against cancer are tempered by the potential for exaggerated claims and exploitation.

**Keywords:** Cancer, Mobile Applications, Telemedicine, Cancer Survivor

## Article Summary

### Strengths and Limitations of this study

- Scoping review categorising and summarising a wide range of apps available for cancer survivors on on-line stores
- Content and thematic analysis based on verbatim descriptions from the stores
- Individual apps not downloaded or quality assessed

### Introduction

The number of individuals living with and beyond cancer (also known as cancer survivors) is increasing (1,2). In the United Kingdom, it is estimated that the number of cancer survivors will grow by approximately one million every decade, from 2.1 million in 2010 to 5.3 million in 2040 (2). Cancer is increasingly becoming a chronic disease. Cancer survivors can experience increased physical, psychological, and social issues after their diagnosis, (3) accompanied by a range of unmet needs (4). There is growing political and clinical interest in utilising digital technologies to deliver efficient, high quality care for cancer survivors (5) and to empower patients to perform self-management activities (6).

The market for apps, including health apps is growing rapidly (7,8) with an estimated 318,000 health apps available in 2018. It is estimated that over 200 health apps are added daily to app stores (9). Against this changing technological environment, attempts to summarise and evaluate healthcare apps in traditional systematic reviews are limited by the relatively small proportion of technologies which are reported in published literature (10,11). An alternative strategy has been to identify and review apps that are available for download via on-line stores (12–14) .

In 2012, Bender et al searched online stores to characterise the purpose and content of apps focusing on any aspect of cancer (15). Of 295 cancer apps, most were limited in their scope,

1  
2  
3 focusing primarily on providing information and raising awareness about cancer in general,  
4 and promoting/fundraising for charities (15). In 2014, Kassianos et al searched on-line stores  
5 for melanoma detection apps, identifying 39 apps. Most gave education or advice about  
6 melanoma, ultraviolet radiation exposure, and skin self-examination strategies (16).  
7  
8  
9  
10  
11  
12

13 Relatively little is known about apps targeting people living with and beyond cancer. Dahlke  
14 et al conducted a review to identify behaviour change techniques (17) (BCTs) embedded in  
15 cancer survivorship apps, searching app stores in November 2013 (18). Eighteen BCTs were  
16 present across 65 apps, including providing instruction, tailoring (for example, adjusting the  
17 information delivered based on user input), personalisation (for example, the user can select  
18 elements specific to them such as disease type), and prompting intention formation. What  
19 was less clear were the range of behaviours targeted, the aims and scope of the apps, how the  
20 BCTs were operationalised and organised, and where the technology itself might add value to  
21 survivorship care.  
22  
23  
24  
25  
26  
27  
28  
29  
30  
31  
32  
33

34 The aim of this review is to characterise apps targeting individuals living with and beyond  
35 cancer that are currently available for download via the two major app stores (Google Play  
36 and Apple's App Store), which have been estimated to contain over ninety percent of all apps  
37 (16). The review will provide a summary of the apps' advertised components, stated aims,  
38 and technological features. We aim to categorise and organise the apps such that clinicians,  
39 app developers, and policy makers can make sense of the current international app market for  
40 people living with and beyond cancer.  
41  
42  
43  
44  
45  
46  
47  
48  
49  
50

## 51 **Methods**

52 We performed a scoping review,(19) searching Apple's App Store and Google Play to  
53 identify apps targeting people living with and beyond cancer, and used content analysis (20)  
54 to characterise advertised content. Scoping reviews differ from traditional systematic reviews  
55  
56  
57  
58  
59  
60

1  
2  
3 in that they map a topic in order to communicate the breadth and depth of the field,(21) and  
4  
5 do not tend to involve formal quality assessment of the evidence (19). They describe the  
6  
7 “extent, range, and nature” (19) of the available evidence, and set it in context in terms of  
8  
9 current understanding. Scoping reviews require analytical interpretation of the subject area  
10  
11 (22). They are particularly useful when synthesis involves non-research material,(22) and for  
12  
13 emerging areas of research.  
14  
15

16  
17 In this scoping review, we did not download and interact with the apps or test quality or  
18  
19 functionality. In a previous review, Kassianos et al used app store summaries and were able  
20  
21 to yield detailed descriptions of melanoma app content (16). Based on older reviews,(15,18)  
22  
23 we expected to find a large number of apps, and in this rapidly changing field, the time  
24  
25 required to interact with each app would lead to significant delays in communicating our  
26  
27 findings. We wished to include paid apps, and had limited resources to buy individual apps  
28  
29 for multiple authors. We also wished to include any apps affiliated with specific centres or  
30  
31 clinical trials which would require log in credentials.  
32  
33  
34

### 35 36 37 Search strategy

38  
39 Initial searches were conducted by two authors, DM and RA, who refined the search criteria.  
40  
41 The lead author then searched the two leading app stores, Apple’s App store (we used an  
42  
43 iPhone with iOS operating system), and Android’s Google Play (we used a PC with Windows  
44  
45 operating system) in September 2018 using the keywords “cancer”, “cancer survivor”, and  
46  
47 “cancer survivorship”.  
48  
49

### 50 51 52 Inclusion and exclusion criteria

53  
54 We included: apps aimed at patients living with and beyond cancer; free and paid apps from  
55  
56 any country; apps that included pre-diagnosis support and information (so long as they also  
57  
58  
59  
60

1  
2  
3 specifically targeted individuals living with and beyond cancer); and apps covering more than  
4  
5 one clinical condition, so long as cancer was a named condition.  
6  
7

8 We excluded: apps unavailable in English or without English descriptions; simple awareness  
9  
10 raising or pre-diagnosis apps (apps raising awareness of symptoms that were potentially  
11  
12 indicative of cancer or risk assessment tools, skin/mole checking apps for individuals without  
13  
14 a diagnosis of skin cancer, simple factsheets about a certain cancer type, or glossaries); and  
15  
16 recipe and diet apps that were not specifically targeting patients living with and beyond  
17  
18 cancer.  
19  
20  
21

22  
23 Apple's App store operates a "continuous scroll" function, meaning that the store loads  
24  
25 content continuously to return results. General search terms or keywords (e.g. "cancer") can  
26  
27 result in "endless scrolling" or "infinite scrolling", where results are continuously returned  
28  
29 without an apparent end point. Our initial scoping searches showed that apps became much  
30  
31 less relevant after the first few hundred results, and we decided to limit our search of Apple's  
32  
33 App store to the first 500 results for the term "cancer". The online stores are not set up to  
34  
35 allow search results to be exported, and decisions about inclusion and exclusion were made  
36  
37 by a single author (RA). The final apps selected for inclusion were reviewed by a second  
38  
39 author (DM) to ensure that they met the eligibility criteria.  
40  
41  
42

#### 43 44 Data extraction and synthesis 45

46  
47 A data extraction form was created in Microsoft Excel and two researchers (RA and DM)  
48  
49 independently extracted data from all apps that met the inclusion criteria. Data were obtained  
50  
51 from the stores' on-line app descriptions, principally the narrative text, but notes were also  
52  
53 taken based upon screenshots of the apps within the store. These notes were added to  
54  
55 summarise any visible content from the screenshots which was in image form but not directly  
56  
57 mentioned in the app description. Verbatim text from the screenshots was imported where  
58  
59  
60



1  
2  
3 available. We searched for and visited developer websites when available in order to gather  
4  
5 background information on the app, particularly with respect to the nature of the organisation  
6  
7 involved in app development (e.g. non-profit organisation or charity, commercial, academic)  
8  
9 and country of origin.  
10  
11

12  
13 Data were extracted on: cancer type(s); name of owner and/or developer (sometimes the  
14  
15 same); country of origin; operating system (Apple/Android/both); fee to download; type of  
16  
17 owner (charity, commercial, academic institution, healthcare provider, combination); number  
18  
19 of downloads (available on Google Play only); star rating and the presence/absence of a  
20  
21 statement about clinical or scientific input into app development. Data on number of  
22  
23 downloads, and star ratings were extracted by the lead author alone, as this was judged to be  
24  
25 a changing parameter. Data were imported into SPSS version 24, and descriptive statistics  
26  
27 were calculated.  
28  
29  
30  
31

32  
33 The text description of the app given in the online store was copied verbatim and imported  
34  
35 into Microsoft Word. We used content analysis (20) and thematic analysis (23) to organise,  
36  
37 categorise, and synthesise qualitative data. App descriptions and accompanying notes were  
38  
39 imported into NVivo version 11. Data familiarisation took place by reading and re-reading  
40  
41 app descriptions. Initial codes were generated by the lead author in order to organise the data  
42  
43 into meaningful groups and these were discussed with a second author (DP) (24) Codes were  
44  
45 sorted into categories, based on how the codes were related and linked. Each app was then  
46  
47 analysed independently by two reviewers (RA and DM) to categorise the advertised content.  
48  
49 The reviewers were alert to any content which did not fit the categories. We also analysed  
50  
51 themes within the language used to describe the apps. Reviewers met after the data  
52  
53 categorisation exercise and compared results, reaching consensus by discussion.  
54  
55  
56  
57  
58  
59  
60

## Patient and Public Involvement

We did not involve patients or the public in this scoping review, but rather plan to use the results to inform technology co-design projects which involve patients and the public.

## **Results**

We screened 1265 apps and included 151 in our final synthesis (see flow chart, Figure 1).

The main reasons for exclusion were apps not specifically targeting cancer survivors, only targeting clinicians, or not relating to cancer. Four apps (*Cancer Stage IV Cure Methodology*, *Driver*, *Inspire*, and *NIH Breast Cancer Information*) became unavailable during our data analysis process between 8<sup>th</sup> September 2018 and 24<sup>th</sup> May 2019, and were excluded because we were unable to return to the on-line descriptions to check accuracy during dual data extraction.

A full list of included apps, data on star ratings, and the raw data used in our analyses are included as a supplementary data file. App names will be reported in Italics throughout our results.

## **App demographics**

Characteristics of the apps are provided in Table 1. Of note, most of the apps covered all cancer types (n = 89, 58.9%) or were specific to breast cancer (n = 22, 14.6%). Over 90 percent were free to download. Apps were developed by a mix of private companies/individuals (n = 64, 43%), charity/non-profit organisations (n = 30, 19.9%), healthcare organisations (n = 15, 9.9%) and academic institutions (n = 8, 5.3%). We found apps sharing the same developer and with similar content, but differing by cancer type: Eight apps were developed by “@point of care”, and five apps developed by “Self-care catalysts”, both commercial developers based in the USA. The nature of the developer could not be determined for 16 apps (10.6%).

**Table 1: Description of apps targeting individuals living with and beyond cancer available on Apple's App Store and Google Play**

| <b>Cancer Types Covered</b>                                             | <b>Number* (%)</b> |
|-------------------------------------------------------------------------|--------------------|
| All cancers                                                             | 89 (58.9)          |
| Breast                                                                  | 22 (14.6)          |
| Prostate                                                                | 9 (6.0)            |
| Lung or mesothelioma                                                    | 5 (3.3)            |
| Bladder or renal                                                        | 5 (3.3)            |
| Liver and/or pancreas                                                   | 3 (2.0)            |
| Haematological                                                          | 3 (2.0)            |
| Retinoblastoma, eye, or childhood cancers                               | 3 (2.0)            |
| Colorectal                                                              | 2 (1.3)            |
| Melanoma                                                                | 2 (1.3)            |
| Multiple cancers (breast and ovarian, breast, prostate, and colorectal) | 2(1.3)             |
| Head and neck or oral                                                   | 2 (1.3)            |
| Others (testicular, ovarian, soft tissue sarcoma, carcinoid)            | 4 (2.6)            |
| <b>Type of Developer</b>                                                | <b>Number (%)</b>  |
| Commercial or private organisation                                      | 65 (43.0)          |
| Charity or non-profit organisation                                      | 30 (19.9)          |
| Unclear                                                                 | 16 (10.6)          |
| Healthcare organisation                                                 | 15 (9.9)           |
| Academic organisation                                                   | 8 (5.3)            |
| Clinical or research societies/networks or government                   | 4 (2.7)            |
| Partnership of various types of organisation                            | 13 (8.6)           |
| <b>Platform</b>                                                         | <b>Number (%)</b>  |
| Both Google Play and Apple's App store                                  | 66 (43.7)          |
| Apple's App store only                                                  | 47 (31.1)          |
| Google Play only                                                        | 38 (25.2)          |
| <b>Country of Origin</b>                                                | <b>Number (%)</b>  |
| USA                                                                     | 68 (45.0)          |
| Unclear                                                                 | 31 (20.5)          |
| UK, Ireland, or Gibraltar                                               | 15 (9.9)           |
| Multinational                                                           | 7 (4.6)            |
| India                                                                   | 7 (4.6)            |
| Canada                                                                  | 5 (3.3)            |
| Malaysia or Singapore                                                   | 5 (3.3)            |
| Australia                                                               | 4 (2.6)            |
| The Netherlands                                                         | 3 (2.0)            |
| Others (France, Germany, Hungary, Morocco, Pacific Islands, Spain)      | 6 (4.0)            |
| <b>Number of Downloads (Google Play only, data for 104 apps)</b>        | <b>Number (%)</b>  |
| <100                                                                    | 45 (43.3)          |
| 100-500                                                                 | 24 (23.1)          |
| 500-1000                                                                | 9 (8.7)            |
| 1000-5000                                                               | 17 (16.3%)         |
| 5000-10,000                                                             | 3 (2.9)            |
| 10,000-50,000                                                           | 5 (4.8)            |
| >50,000                                                                 | 1 (0.9)            |
| <b>Price to download (£ Sterling)</b>                                   | <b>Number (%)</b>  |
| Free                                                                    | 140 (92.7)         |
| <£9.49 Google Play/ <£12.99 App store                                   | 9 (6.0)            |
| >£12.99                                                                 | 2 (1.3)            |

\*Total number of apps reviewed = 151

1  
2  
3 Unlike Apple's App store, Google Play provides statistics for the number of app downloads.  
4  
5 Of the 104 apps available on Google Play, 45 apps (43.3%) had been downloaded less than  
6  
7 100 times. Five apps ( *Cancer.net mobile*, *MD Anderson mobile*, *Cancer fighting food*,  
8  
9 *Cancer Curing foods*, and *My Cancer Coach*) had between 10,000 and 50,000 downloads.  
10  
11 One app, *Belong Life*, had over 50,000 downloads. *Belong Life* markets itself as an  
12  
13 "information sharing platform", featuring an on-line social network of individuals with  
14  
15 cancer, healthcare professionals who answer questions, access to personalised information,  
16  
17 and a clinical trial matching service.  
18  
19  
20  
21  
22

### 23 **Themes within on-line descriptions of the apps**

24  
25 Verbatim app descriptions and text from screenshots ran to over 30,000 words. Three  
26  
27 prominent themes were: Fighting for Life, Navigating a Journey, and Being Empowered to  
28  
29 Take Control. Examples of app descriptions fitting these themes, with quotations, are  
30  
31 included in Table 2. Fighting metaphors were observed within a range of apps and were  
32  
33 sometimes contained within the app title (e.g. *Attack Cancer using Hypnosis & Guided*  
34  
35 *Imagery/Meditation*, *Cancer Defeated*, and *Cancer Fighting Foods*). In fighting metaphors,  
36  
37 cancer was depicted as an enemy invader and surviving cancer as a battle. Metaphors about  
38  
39 fighting and battles were prominent in apps promoting healthy eating or specific "cancer-  
40  
41 fighting" foods or diets.  
42  
43  
44  
45

46  
47 Cancer was often compared to a journey and apps marketed themselves as tools to help  
48  
49 navigate that journey. Apps that incorporated social networking often emphasised that the  
50  
51 cancer journey did not have to be navigated alone. Social networking was suggested as a  
52  
53 source of knowledge and emotional support. Many apps promoted peer comparison, and  
54  
55 emphasised that others around the world were facing very similar problems, with some apps  
56  
57 referring to "others like you". There was a sense within language used that cancer was  
58  
59 associated with loss of control, and that downloading and interacting with an app was a  
60

method of empowerment and taking back control. Apps were marketed to individuals as a method of becoming actively involved in self-management.

Table 2: Themes present within app marketing statements with example quotations

| Theme                           | Example app (name in <i>Italics</i> ) with quotations from on-line app store                                                                                                                                                                                                                                                                                                                             |
|---------------------------------|----------------------------------------------------------------------------------------------------------------------------------------------------------------------------------------------------------------------------------------------------------------------------------------------------------------------------------------------------------------------------------------------------------|
| Fighting for life               | <p><i>Twist out cancer</i> : “[get to] know other cancer survivors who fought with odds and kicked cancer in the butt!”</p> <p>“<i>Whip cancer</i> provides people with the power to instantly and accurately picture the cancer cells they want to expel from their bodies... <i>Whip Cancer</i> is a powerful tool to help you become relaxed and thus feel empowered while battling your cancer.”</p> |
| Navigating a journey            | <p><i>Breast Cancer healthline</i>: “You’re not on this journey alone. Are you facing a diagnosis? Already in treatment? Remission? We’ll connect you with people just like you, at the same stage in the journey”.</p> <p>“The <i>BigC-Connect</i> platform has been designed to help survivors of cancer on their journey to survival.</p>                                                             |
| Being empowered to take control | <p>“Hearing that you have been diagnosed with breast cancer can turn your world upside down. The <i>OWise breast cancer</i> app can help you regain control during the chaotic times of illness and treatments”</p> <p><i>Blood Cancer Storylines</i> is filled with great tools to help you take control of your health.</p>                                                                            |

### Content analysis

The apps offered content that could be summarised under five main categories: (1) Imparting Information about Cancer; (2) Planning and Organising Cancer Care; (3) Interacting with Others (including others affected by cancer, and healthcare professionals); (4) Enacting Management Strategies, and Adjusting to Life With or Beyond Cancer; and (5) Getting Feedback about Cancer Management. The specific app features that support each of these activities are summarised in Table 3 and discussed below.

**Table 3: Advertised app functions that support cancer survivorship activities**

| Survivorship activity                               | App feature                                                                                                                                                                                        | Number (%) apps which advertised this feature |
|-----------------------------------------------------|----------------------------------------------------------------------------------------------------------------------------------------------------------------------------------------------------|-----------------------------------------------|
| <b>Imparting information about cancer</b>           | Delivers information about the nature of cancer, cancer terminology, treatment approaches, and services. Apps present information as text, news feeds/updates, videos, and question/answer formats | 81 (53.6%)                                    |
|                                                     | Gives dietary and/or exercise advice, targeting individuals living with and beyond cancer                                                                                                          | 15 (9.9%)                                     |
| <b>Planning and organising cancer care</b>          | Upload and store personal records e.g. diaries/journals, results                                                                                                                                   | 25 (16.6%)                                    |
|                                                     | Keep a list of medications +/- their scheduling                                                                                                                                                    | 20 (13.3%)                                    |
|                                                     | Share uploaded personal records with others                                                                                                                                                        | 8 (5.3%)                                      |
|                                                     | Keep a calendar of appointments                                                                                                                                                                    | 12 (8.0%)                                     |
|                                                     | Login to view or change clinical appointments                                                                                                                                                      | 4 (2.7%)                                      |
|                                                     | Login to remotely access clinical records or results                                                                                                                                               | 3 (2.0%)                                      |
|                                                     | Create or view survivorship care plan                                                                                                                                                              | 2 (1.3%)                                      |
|                                                     | Lists available clinical trials                                                                                                                                                                    | 9 (6.0%)                                      |
| <b>Interacting with others</b>                      | Clinical trials matching                                                                                                                                                                           | 1 (0.7%)                                      |
|                                                     | Access to an on-line cancer community or social network (Four offered a matching service)                                                                                                          | 25 (16.6%)                                    |
|                                                     | List of local (geographically limited) sources of peer support                                                                                                                                     | 11 (7.3%)                                     |
|                                                     | Message a linked healthcare professional                                                                                                                                                           | 4 (2.7%)                                      |
| <b>Enacting management strategies and adjusting</b> | Ask a professional within an online community                                                                                                                                                      | 3 (2.0%)                                      |
|                                                     | Track and record specific symptoms or physiological parameters                                                                                                                                     | 29 (19.2%)                                    |
|                                                     | Provides symptom management tips and advice                                                                                                                                                        | 5 (3.3%)                                      |
|                                                     | Set alarms as reminders to take medication                                                                                                                                                         | 14 (9.3%)                                     |
|                                                     | Track fitness or diet (four apps offered integration with wearable fitness trackers)                                                                                                               | 5 (3.2%)                                      |
|                                                     | Delivers instructions on complementary and/or alternative therapies                                                                                                                                | 12 (7.9%)                                     |
| <b>Getting feedback about cancer management</b>     | Delivers psychological therapies                                                                                                                                                                   | 3 (2.0%)                                      |
|                                                     | Offers spiritual support e.g. bible verses, prayers                                                                                                                                                | 2 (1.4%)                                      |
|                                                     | Generates graphical summaries of self-monitoring data for personal reflection and sharing with others (particularly clinicians)                                                                    | 21 (13.9%)                                    |
|                                                     | Generates or supports creation of question prompt lists (intended to be used during medical encounters)                                                                                            | 13 (8.6%)                                     |
|                                                     | Allows video or audio-recording of medical consultations                                                                                                                                           | 4 (2.7%)                                      |

### Imparting Information about Cancer

Over half the apps (n=81, 53.6%) stated in their description that they provided information or educational materials about cancer; for example, the nature of cancer, aspects of terminology related to cancer, and cancer treatments. The apps presented this in various ways, including

1  
2  
3 fact-sheets/written information, news feeds and updates, questions and answers, and videos.  
4  
5 Some apps (e.g. *Breast Cancer Ally*) provided personalised information based on user-  
6  
7 reported characteristics, including treatments received or disease subtype. One app,  
8  
9 *Personalized Sarcoma Care*, offered prognostic information to users with high-grade soft  
10  
11 tissue sarcoma of the limb who were going to be treated with surgery and radiotherapy. The  
12  
13 app offered a disclaimer that it was not a medical device, not meant to be used to inform  
14  
15 clinical decisions, and not tested for clinical usefulness. Users were instructed to discuss  
16  
17 prognostic results with their physician.  
18  
19  
20  
21

### 22 Planning and Organising Cancer Care

23  
24  
25 Twenty-five apps (16.6%) allowed users to enter and store records relating to their cancer  
26  
27 care, such as results or diaries of treatments they had received. Apps also allowed users to  
28  
29 keep a calendar of appointments (n=12, 8.0%) and to keep lists and scheduling of  
30  
31 medications (n=20, 13.3%). Three apps (*MD Andersen Mobile*, *MyMSK*, and *NED*) allowed  
32  
33 registered users linked to the specific cancer centre to log in and view some of their own  
34  
35 results. Four apps (*MD Andersen Mobile*, *MyMSK*, *CanHOPE cancer support* and  
36  
37 *Pratheeksha*) allowed registered patients to view or change appointments.  
38  
39  
40

41  
42 Nine apps listed cancer clinical trials that may be relevant to individuals living with cancer,  
43  
44 and one (*Belong Life*) offered a clinical trials matching service based on parameters entered  
45  
46 by the user. Two apps supported survivorship care plans (SCPs). *My Care Plan* suggested  
47  
48 that users should input data to create their own SCP, and then complete it with their  
49  
50 oncologist. The *Survivor Care* app allowed registered patients with testicular cancer to use  
51  
52 the app to read a QR code (quick response code, or matrix bar code), generated by their  
53  
54 specialist, that gave them access to a personalised care plan.  
55  
56  
57  
58  
59  
60

### Interacting with Others

Twenty five apps (16.6%) offered access to an on-line community (social network) of other individuals with cancer, promoting these networks as sources of support and information.

Four of these (*Boobytrapp*, *Breast Cancer Health*, *Breast Cancer Social*, and *Cnected*) advertised a matching service in which users could be matched with other users or groups based on characteristics such as cancer type, stage, treatments, and interests.

Apps also offered interaction with healthcare professionals: three apps (*Belong.life*, *Breast Friends app*, and *Cancer Connect*) listed the ability to message or ask questions of professionals who were linked to the app platform. Four apps (Medocity's *iCancer Health*, *MD Andersen Mobile*, *MyMSK*, and *Pratheeksha*) allowed users to login and send messages to their linked care team.

### Enacting Management Strategies, and Adjusting to Life With or Beyond Cancer

Specific aspects of self-management supported by apps include symptom tracking and monitoring; setting alarms or reminders to take medications regularly, tracking and adjusting diet and physical activity levels, utilising psychological and complementary approaches, and knowing when to seek medical attention for chemotherapy side effects.

Twenty-nine apps (19.2%) allowed users to track their symptoms: mainly fatigue, pain, mood changes, nausea, and sleep problems. Some suggested monitoring physical or physiological parameters, including pulse, blood pressure, and weight, and some allowed customisation, letting the user decide which symptoms/parameters to monitor. The recommended frequency of self-monitoring varied, with some promoting weekly input, some apps suggesting on-demand tracking when symptoms were experienced, and others not specifying particular intervals for self-monitoring. Apps utilised a number of rating scales, including touch-screen



1  
2  
3 sliders, and faces rating scales. The data were used to provide graphs and output reports (see  
4  
5 “feedback” below).  
6  
7

8 Fifteen apps (9.9%) gave advice about diet and/or exercise after a cancer diagnosis, with five  
9  
10 allowing users to track their exercise or dietary activities. Four apps offered integration with  
11  
12 wearable fitness trackers.  
13  
14

15  
16 Complementary and alternative therapies were a prominent component of 12 apps (7.9%),  
17  
18 which gave instructions on relaxation techniques, provided “healing” music playlists, and  
19  
20 taught guided imagery, visualisation, meditation, Qigong, and yoga. The *MeTime* app,  
21  
22 developed by University of Michigan, taught acupressure to manage fatigue in breast cancer  
23  
24 survivors, and quoted evidence supporting its use from a randomised controlled trial (25).  
25  
26

27 Three apps (*Emory Awake*, *UNTIRE*, and *Bubble VR*) delivered programmes of psychological  
28  
29 therapy to cancer survivors; for example, *Bubble VR* delivered cognitive behavioural therapy  
30  
31 (CBT), guided imagery, meditation, and mindfulness-based stress reduction (MBSR) within  
32  
33 Virtual Reality. The app was linked to a focus group research study, and registered  
34  
35 participants could use a PIN code to interact with it.  
36  
37  
38

39 Three apps (*CanAdvice+*, *Cancer Emergency Response Tool*, and *For Cancer Care*)  
40  
41 specifically targeted people on chemotherapy, and sought to help users judge when to seek  
42  
43 medical attention for side effects or problems experienced during chemotherapy. *CanAdvice+*  
44  
45 and *Cancer Emergency Response Tool* were linked to UK cancer centres and utilised the  
46  
47 United Kingdom Oncology Nurses Society (UKONS) triage tool (26), whereas *For Cancer*  
48  
49 *Care* offered generic tips and advice to manage chemotherapy side effects.  
50  
51  
52

53  
54 Some apps dealt with changes in body image after cancer, and psychological adjustment to  
55  
56 physical changes. *Inkspiration* app allowed users to “try on” mastectomy tattoos, super-  
57  
58  
59  
60

1  
2  
3 imposing tattoos onto photo uploads. *BECCA – the Breast Cancer Care app* offered beauty  
4 tips alongside other information about breast cancer.  
5  
6  
7

### 8 9 **Getting Feedback about Cancer Management**

10  
11 Twenty one apps (13.9%) allowed users who had tracked symptoms to generate graphical  
12 summaries of their self-monitoring data for personal reflection (usually line graphs showing,  
13 for example, pain levels plotted against date/time), and to generate output reports from the  
14 data, usually by email. A central premise was that users would learn about patterns within  
15 their symptoms, and that sending their symptom reports to professionals could result in action  
16 by the professional to help with symptom management.  
17  
18  
19  
20  
21  
22  
23  
24

25  
26 Apps also attempted to influence clinical encounters between users and their clinicians by  
27 allowing them to generate (sometimes from templates or lists) or store questions that they  
28 would like to ask at the next medical encounter (n=13, 8.6%). Four apps (*Focus on*  
29  
30  
31  
32  
33  
34  
35  
36  
37  
38  
39  
40  
41  
42  
43  
44  
45  
46  
47  
48  
49  
50  
51  
52  
53  
54  
55  
56  
57  
58  
59  
60  
*Lymphoma, My Cancer Coach, O'Wise Breast Cancer, and Pocket Cancer Care Guide –*  
*National Coalition for Cancer Survivorship*) allowed users to video- or audio-record their  
medical consultations.

### 41 42 **Clinical and/or Scientific Basis for App Content and Apps as Commercial Opportunities**

43  
44 Fifty one out of 151 apps (33.8%) cited clinical or scientific/clinical research team input into  
45 the development of the app within the online description. Most of these apps were developed  
46 by recognisable institutions, such as universities, clinics, or charities. However, one app,  
47  
48  
49  
50  
51  
52  
53  
54  
55  
56  
57  
58  
59  
60  
*Don't Die 2* retailing at £299.99 on Google Play, had limited information about content, and  
stated: "Contains new cancer approach not previously available to cancer victims. All results  
obtained after a rigorous 12-year study and when applied to active cancer patients show  
dramatic results increasing survival results." The app was developed by a family cancer

1  
2  
3 foundation (MiSong Foundation), and screenshots showed an enquiry form which users could  
4 fill in for further information. Links to the developer website were inactive.  
5  
6  
7

8 We found a number of apps offering purchasable products to cancer survivors and apps that  
9 made claims about offering a potential cancer cure. *Best Prostate Cancer Treatment* opened  
10 its description by stating: “Court Documented Proof That The Cure For Prostate Cancer &  
11 Colon Cancer is real”. Screenshots from the app were captioned with “PROSTATE  
12 CANCER Cure for Cancer Now Available”, and the app offered treatments based on whole-  
13 leaf Aloe Vera. One screenshot showed an “Advanced Package” with products available for  
14 \$750. The app description marketed the product as follows: “The advanced package provides  
15 specific elements to expedite the healing process. This package revitalizes and engages  
16 intercellular advancement and ease in detoxification”. *Cancel Cancer* mentioned links  
17 between body acidity and cancer, and screenshots from the app showed order forms, products  
18 for sale, and videos about Kangen water, an alkaline water.  
19  
20  
21  
22  
23  
24  
25  
26  
27  
28  
29  
30  
31  
32  
33

34 Three apps contained the word “cure” in their title. *Cancer Cure* (retailing on Google for  
35 £28.99) offered “300 alternate healing ideas” and was recommended for “anyone who is  
36 struggling for cancer survival”. *Cancer Curing Foods* (free to download) had been  
37 downloaded more than 10,000 times on Google Play and offered “top ten fruits, vegetables,  
38 and foods that can cure cancer”. *Various Cancer Cures*, offered free via Google Play, listed  
39 information about surgery, chemotherapy, and radiotherapy as treatment options for cancer.  
40  
41  
42  
43  
44  
45  
46  
47  
48

49 *Cancer Wellness* invited users to complete a weekly cancer survey, with links to a private  
50 clinic in the Pacific Islands (<http://cancerwellnessclinic.com/our-treatment-program/>) that  
51 offered alternative cancer treatments and supplements. In *Ways to Fight Off Cancer*, available  
52 on Google Play, the on-line description had statements that included “broccoli cures cancer”  
53 and “tomato cures cancer”... “So What Are you Waiting For !?! Download the "Ways Fight  
54  
55  
56  
57  
58  
59  
60

1  
2  
3 Off Cancer" Now!" Other potentially exaggerated claims were found in apps promoting  
4  
5 complementary therapies and visualisation; for example *Cancer Fighting App* stated (sic.)  
6  
7 "After working on visualization for few weeks, the cancer tumor had shrunk to small its size  
8  
9 and its continuous become smaller and smaller. Imagination and visualization for creating  
10  
11 radiant, lifelong health and happiness."  
12  
13

## 14 15 16 **Discussion**

### 17 18 Main findings

19  
20 We reviewed 151 apps targeting individuals living with and or beyond cancer, available for  
21  
22 download via on-line stores. The apps are often marketed in terms of fighting cancer, taking a  
23  
24 journey, and taking control. Apps are heterogeneous in terms of aims and scope, but typical  
25  
26 content includes informational resources, diary functions, access to on-line social  
27  
28 networks/communities, and symptom-tracking capabilities linked to graphical outputs.  
29  
30

31  
32 App owners came from a range of backgrounds (e.g. non-profit organisations, academic  
33  
34 institutions, healthcare providers), but most publically available apps had been developed by  
35  
36 commercial or private organisations. We were unable to discern the nature of the developer in  
37  
38 16 apps, despite visiting linked websites. We also found some apps that seemed to make  
39  
40 exaggerated claims, for example, about foods that cure cancer, visualisation regimes that  
41  
42 shrink tumours (see examples above), and apps that marketed or sold products with  
43  
44 questionable efficacy (e.g. Kangen water or Aloe Vera extract).  
45  
46  
47  
48  
49

### 50 Comparison with existing literature, and implications for practice, policy, and research

51  
52 Violence and journey metaphors are known to be widely used in the context of cancer and  
53  
54 cancer fundraising campaigns, and have sparked debate.<sup>(27)</sup> Both violence and journey  
55  
56 metaphors can be perceived in both positive, and in disempowering ways. We found these  
57  
58 metaphors to be prominent in on-line app marketing.  
59  
60

1  
2  
3 Apps cover some of the areas that are recommended in clinical guidelines for cancer  
4 survivorship care (28), such as information provision; making lifestyle changes (particularly  
5 diet and exercise), dealing with physical and psychosocial effects of cancer and its treatment,  
6 and providing survivorship care plans. The potential usefulness of reputable apps may be  
7 undermined by the fact that they appear in stores alongside those that are potentially  
8 exploitative.  
9

10 Guidelines and regulatory procedures for health apps have been introduced in the UK (29,30)  
11 and the USA (31), but these mainly apply to apps classed as medical devices (used to  
12 diagnose, support diagnosis or clinical decision making, or make calculations to determine  
13 diagnosis or treatment), which are considered to carry the highest risks. Apps that provide  
14 education, monitor health or well-being, and store or transmit data without change are not  
15 subject to the same regulatory procedures.(30) These types of apps can be developed quickly  
16 by anyone who wishes to (32), without specific regulatory requirements.  
17

18 There is increasing recognition that lack of public trust is a major barrier to the successful  
19 utilisation of data and technology to improve patient outcomes.(33) In a recent review, Wyatt  
20 discussed problems with health apps, including privacy issues, poor quality content, and  
21 variable accuracy, for example, in diagnosing melanoma (34). In our review, the majority of  
22 apps were free, and it was beyond the scope of this review to determine how apps attracted  
23 revenue. Potential sources include advertising, in-app purchases, and data “harvesting”. There  
24 is increasing evidence that sharing of user data is routine in medical apps (35) and that data  
25 harvesting for targeted advertising is an important source of revenue for many app  
26 developers.(34)  
27

28 Questions remain about the clinical role of cancer apps, how they affect formal medical care  
29 and influence clinical outcomes. Some of the apps we reviewed helped users to generate lists  
30  
31  
32  
33  
34  
35  
36  
37  
38  
39  
40  
41  
42  
43  
44  
45  
46  
47  
48  
49  
50  
51  
52  
53  
54  
55  
56  
57  
58  
59  
60

1  
2  
3 of questions that could be taken to appointments or facilitated video or audio-recording of  
4 consultations. Formal trials of this type of approach have shown promise in the oncology  
5 setting, with respect to improving patients' information needs, their satisfaction with patient-  
6 professional communication, and recall of information (36–38). Whether these findings can be  
7 extrapolated to specific apps is unclear.  
8  
9

10  
11  
12  
13  
14  
15 Many of the apps we reviewed attempted to influence medical care by suggesting that self-  
16 monitoring reports be shared with clinicians. Patient reported outcome monitoring has been  
17 shown to improve patient satisfaction with care in the oncology setting, and to increase the  
18 number of patient outcomes that are discussed during consultations.(26,27). However, any  
19 effects are likely to be contingent on how the data are used during clinical encounters and  
20 what data are collected.(39) Scientific trials tend to use validated questionnaires, as opposed  
21 to the, often generic, tools present within apps.  
22  
23  
24  
25  
26  
27  
28  
29  
30  
31

32 There seems to be a widely held assumption in symptom management apps that providing  
33 patients with simple graphical summaries of their self-reported symptom data will afford  
34 insights that could improve symptom management. Conversely, there is a danger that apps  
35 could increase the work and burden of cancer survivorship activities without resultant  
36 benefits to the user. We noted close parallels between categories of app content (Table 3),  
37 and models of treatment burden in other chronic conditions.(29–31).  
38  
39  
40  
41  
42  
43  
44  
45

#### 46 Strengths and limitations

47  
48  
49 The app market is changing rapidly – more apps are being added to app stores every day, and  
50 it is also possible for developers to delete apps from on-line stores. We have presented a  
51 snapshot of what was available between September 2018 and May 2019. The main limitation  
52 of this review is that we did not download and interact with individual apps. To have done so  
53 would have added considerable time to the review process (which was time-sensitive, given  
54  
55  
56  
57  
58  
59  
60

1  
2  
3 the changing nature of the market), and would have also involved buying several apps that  
4 looked to have limited content (e.g. “Don’t die 2” retailed at £299.99). Our content analysis is  
5 based on what was stated in online descriptions, and may underestimate content contained  
6 within the apps. We did not register a review protocol, which is a relatively new requirement  
7 in updated PRISMA guidelines for scoping reviews, which were published after we started  
8 this review (40).  
9

10  
11 App stores are commercial entities and are not searchable in the same way as databases of  
12 published medical literature. We fully expect that other relevant apps exist which have not  
13 been identified by our searches. Furthermore, it is not possible to save or export searches.  
14 Apps are displayed in an order that is determined by on-line stores, and, to the best of our  
15 knowledge, the exact sort algorithms utilised by stores are not in the public domain. This  
16 makes searches difficult to accurately reproduce, and also made it difficult to involve two  
17 authors in all stages of the app selection process. Nevertheless, where possible, we have  
18 adopted principles of systematic reviewing. We are confident that we have identified apps in  
19 a systematic and unbiased way, and have characterised a large spectrum of currently available  
20 apps.  
21  
22  
23  
24  
25  
26  
27  
28  
29  
30  
31  
32  
33  
34  
35  
36  
37  
38  
39  
40

## 41 **Conclusions**

42 Apps exist that cover a large spectrum of cancer survivorship activities: key components are  
43 information provision, storing personal summaries, and self-monitoring. The effects of such  
44 apps on clinical consultations, patient work/burden, and clinical outcomes merit further  
45 attention. Most apps are developed by commercial organisations, and promises of  
46 empowerment in the “fight” against cancer are tempered by the potential for exaggerated  
47 claims and exploitation. We suggest five D’s that could be used as a rule of thumb when  
48 discussing cancer and other health apps with patients (Text Box 1).  
49  
50  
51  
52  
53  
54  
55  
56  
57  
58  
59  
60

1  
2  
3 **Text Box one: Five D's to discuss with patients if they are considering using a health**  
4  
5 **app**  
6  
7

8 **Does something useful** – does it solve a problem you are having?  
9

10 **Design** – are there screenshots that summarise the content and give you an  
11 impression of how you would use the app?  
12

13 **Developer** – do you recognise a credible organisation/source behind the  
14 app?  
15

16 **Downloads** – have lots of other people downloaded it and given it  
17 favourable ratings/written comments?  
18

19 **Data** – does it ask you for personal information that you would prefer not  
20 to be shared with others or provide safeguards to keep your information  
21 private?  
22  
23  
24  
25

26  
27 **Funding:** This work was supported by NHS Grampian Pump Priming funding, grant  
28 reference RG14437-11. DP is supported by the strategic research programme funded by the  
29 Scottish Government's Rural and Environment Science and Analytical Services Division  
30  
31

32 **Competing Interests:** RA and PM are involved in researching, designing, and developing  
33 apps for people with cancer but have no associations with commercial entities. None of our  
34 apps are available via online stores, or represented within this review. There are no other  
35 competing interests of conflicts to declare.  
36  
37  
38  
39

40 **Contributions:** RA conceptualized this review, designed the review, undertook searches,  
41 assessed the apps for inclusion/exclusion, undertook data extraction, and wrote the paper.  
42  
43

44 DM undertook scoping searches, helped refine the search criteria, checked the final apps  
45 fulfilled inclusion/exclusion criteria, and performed independent dual data extraction and  
46 content coding. He contributed to drafts of the paper, and revising the article critically.  
47  
48  
49

50 DP assisted with thematic analysis, and revising the article critically.  
51  
52  
53  
54  
55  
56  
57  
58  
59  
60



1  
2  
3 PM contributed to drafts of the paper and revising the article critically.  
4  
5

6 **Figure 1: Identification and screening process for apps included in this review**  
7  
8  
9

10  
11  
12  
13  
14  
15  
16  
17  
18  
19  
20  
21  
22  
23  
24  
25  
26  
27  
28  
29  
30  
31  
32  
33  
34  
35  
36  
37  
38  
39  
40  
41  
42  
43  
44  
45  
46  
47  
48  
49  
50  
51  
52  
53  
54  
55  
56  
57  
58  
59  
60

For peer review only

## References

1. National Cancer Institute. Cancer Statistics - National Cancer Institute [Internet]. [cited 2019 Feb 1]. Available from: <https://www.cancer.gov/about-cancer/understanding/statistics>
2. Maddams J, Utley M, Møller H. Projections of cancer prevalence in the United Kingdom, 2010–2040. *Br J Cancer* 2012;107:1195–202.
3. Elliott J, Fallows A, Staetsky L, et al. The health and well-being of cancer survivors in the UK: findings from a population-based survey. *Br J Cancer* 2011;105 Suppl 1(Suppl 1):S11-20.
4. Nekhlyudov L, O'malley DM, Hudson S V. Integrating primary care providers in the care of cancer survivors: gaps in evidence and future opportunities. *Lancet Oncol* 2017;18:e30–8.
5. Escriva Bouley G, Leroy T, Bernetière C, et al. Digital health interventions to help living with cancer: A systematic review of participants' engagement and psychosocial effects. *Psychooncology* 2018;27:2677–86.
6. Groen WG, Kuijpers W, Oldenburg HS, et al. Empowerment of Cancer Survivors Through Information Technology: An Integrative Review. *J Med Internet Res*. 2015;17:e270.
7. Business of Apps. App Download and Usage Statistics (2018) - Business of Apps [Internet]. 2018 [cited 2019 Feb 14]. Available from: <http://www.businessofapps.com/data/app-statistics/>
8. Burki TK. Cancer apps. *Lancet Oncol* 2013;14(7):580–1.
9. The Rise of mHealth Apps: A Market Snapshot - Liquid State [Internet]. 2018 [cited 2019 May 29]. Available from: <https://liquid-state.com/mhealth-apps-market-snapshot/>
10. Cox A, Lucas G, Marcu A, et al. Cancer Survivors' Experience With Telehealth: A Systematic Review and Thematic Synthesis. *J Med Internet Res* 2017;19(1):e11.
11. Dickinson R, Hall S, Sinclair JE, et al. Using technology to deliver cancer follow-up: a systematic review. *BMC Cancer* 2014;14(1):311.
12. Abroms LC, Lee Westmaas J, Bontemps-Jones J, et al. A content analysis of popular smartphone apps for smoking cessation. *Am J Prev Med* 2013;45(6):732–6.
13. Schoffman DE, Turner-McGrievy G, Jones SJ, et al. Mobile apps for pediatric obesity prevention and treatment, healthy eating, and physical activity promotion: just fun and games? *Transl Behav Med* 2013;3(3):320–5.
14. Azar KMJ, Lesser LI, Laing BY, et al. Mobile applications for weight management: theory-based content analysis. *Am J Prev Med*. 2013;45(5):583–9.
15. Bender JL, Yue RYK, To MJ, et al. A lot of action, but not in the right direction: systematic review and content analysis of smartphone applications for the prevention, detection, and management of cancer. *J Med Internet Res* 2013;15(12):e287.
16. Kassianos AP, Emery JD, Murchie P, et al. Smartphone applications for melanoma detection by community, patient and generalist clinician users: a review. *Br J Dermatol* 2015;172(6):1507–18.

17. Abraham C, Michie S. A taxonomy of behavior change techniques used in interventions. *Health Psychol* 2008;27:379–87.
18. Vollmer Dahlke D, Fair K, Hong YA, et al. Apps seeking theories: results of a study on the use of health behavior change theories in cancer survivorship mobile apps. *JMIR mHealth uHealth* 2015;3:e31.
19. Levac D, Colquhoun H, O'Brien KK. Scoping studies: advancing the methodology. *Implement Sci* 2010;5:69.
20. Hsieh H-F, Shannon SE. Three Approaches to Qualitative Content Analysis. *Qual Health Res* 2005;15:1277–88.
21. Arksey H, O'Malley L. Scoping studies: towards a methodological framework. *Int J Soc Res Methodol* 2005;8:19–32.
22. Davis K, Drey N, Gould D. What are scoping studies? A review of the nursing literature. *Int J Nurs Stud* 2009;46:1386–400.
23. Joffe H, Yardley L. *Research Methods for Clinical and Health Psychology*. SAGE Publications; 2004
24. Methods: Teaching thematic analysis | The Psychologist [Internet]. [cited 2017 Feb 8]. Available from: <http://thepsychologist.bps.org.uk/volume-26/edition-2/methods-teaching-thematic-analysis>
25. Zick SM, Sen A, Wyatt GK, et al. Investigation of 2 Types of Self-administered Acupressure for Persistent Cancer-Related Fatigue in Breast Cancer Survivors: A Randomized Clinical Trial. *JAMA Oncol* 2016;2:1470–6.
26. UKONS. UK Oncology Nurses Society Triage Tool [Internet]. [cited 2019 Jun 6]. Available from: <http://necn.nhs.uk/wp-content/uploads/2018/05/UKONS-Tool-.pdf>
27. UK CR. May I take your metaphor? – how we talk about cancer - Cancer Research UK - Science blog [Internet]. [cited 2019 Jun 6]. Available from: <https://scienceblog.cancerresearchuk.org/2015/09/28/may-i-take-your-metaphor-how-we-talk-about-cancer/>
28. American Society of Clinical Oncology. Guidelines on Survivorship Care | ASCO [Internet]. 2014 [cited 2018 Apr 23]. Available from: <https://www.asco.org/practice-guidelines/cancer-care-initiatives/prevention-survivorship/survivorship-compendium-0>
29. Royal College of Physicians. Using apps in clinical practice guidance | RCP London [Internet]. 2015 [cited 2019 Apr 18]. Available from: <https://www.rcplondon.ac.uk/guidelines-policy/using-apps-clinical-practice-guidance>
30. Medicines & Healthcare products Regulatory Agency. Guidance: Medical device stand-alone software including apps (including IVDMDs) [Internet]. 2018. Available from: [https://assets.publishing.service.gov.uk/government/uploads/system/uploads/attachment\\_data/file/717865/Software\\_flow\\_chart\\_Ed\\_1-05.pdf](https://assets.publishing.service.gov.uk/government/uploads/system/uploads/attachment_data/file/717865/Software_flow_chart_Ed_1-05.pdf)
31. US Departments of Health and Human Services Food and Drug Administration, Center for Devices and Radiological Health C for BE and R. Mobile medical applications. Guidelines for Industry and Food and Drug Administration Staff [Internet]. 2015. Available from:

- 1  
2  
3  
4  
5  
6  
7  
8  
9  
10  
11  
12  
13  
14  
15  
16  
17  
18  
19  
20  
21  
22  
23  
24  
25  
26  
27  
28  
29  
30  
31  
32  
33  
34  
35  
36  
37  
38  
39  
40  
41  
42  
43  
44  
45  
46  
47  
48  
49  
50  
51  
52  
53  
54  
55  
56  
57  
58  
59  
60
- <https://www.fda.gov/downloads/MedicalDevices/DeviceRegulationandGuidance/GuidanceDocuments/UCM263366.pdf>
32. van Velthoven MH, Wyatt JC, Meinert E, Brindley D, et al. How standards and user involvement can improve app quality: A lifecycle approach. *Int J Med Inform* 2018;118:54–7.
33. National Information Board UG. Personalised Health and Care 2020. Using Data and Technology to Transform Outcomes for Patients and Citizens, 2014. Available from: [https://assets.publishing.service.gov.uk/government/uploads/system/uploads/attachment\\_data/file/384650/NIB\\_Report.pdf](https://assets.publishing.service.gov.uk/government/uploads/system/uploads/attachment_data/file/384650/NIB_Report.pdf)
34. Wyatt JC. How can clinicians, specialty societies and others evaluate and improve the quality of apps for patient use? *BMC Med* . 2018;16:225.
35. Grundy Q, Chiu K, Held F, et al. Data sharing practices of medicines related apps and the mobile ecosystem: traffic, content, and network analysis. *BMJ* 2019;364:l920.
36. Wolderslund M, Kofoed P-E, Holst R, et al. Digital audio recordings improve the outcomes of patient consultations: A randomised cluster trial. *Patient Educ Couns* 2017;100:242–9.
37. Clayton JM, Butow PN, Tattersall MHN, et al. Randomized Controlled Trial of a Prompt List to Help Advanced Cancer Patients and Their Caregivers to Ask Questions About Prognosis and End-of-Life Care. *J Clin Oncol* 2007;25:715–23.
38. Amundsen A, Bergvik S, Butow P, et al. Supporting doctor-patient communication: Providing a question prompt list and audio recording of the consultation as communication aids to outpatients in a cancer clinic. *Patient Educ Couns* 2018;101:1594–600.
39. Adam R, Burton CD, Bond CM, et al. Can patient-reported measurements of pain be used to improve cancer pain management? A systematic review and meta-analysis. *BMJ Support Palliat Care*. 2017 Dec;7:0. doi: 10.1136/bmjspcare-2016-001137.
40. Tricco AC, Lillie E, Zarin W, et al. PRISMA Extension for Scoping Reviews (PRISMA-ScR): Checklist and Explanation. *Ann Intern Med*. 2018;169(7):467.

**Figure 1: Identification and screening process for apps included in this review**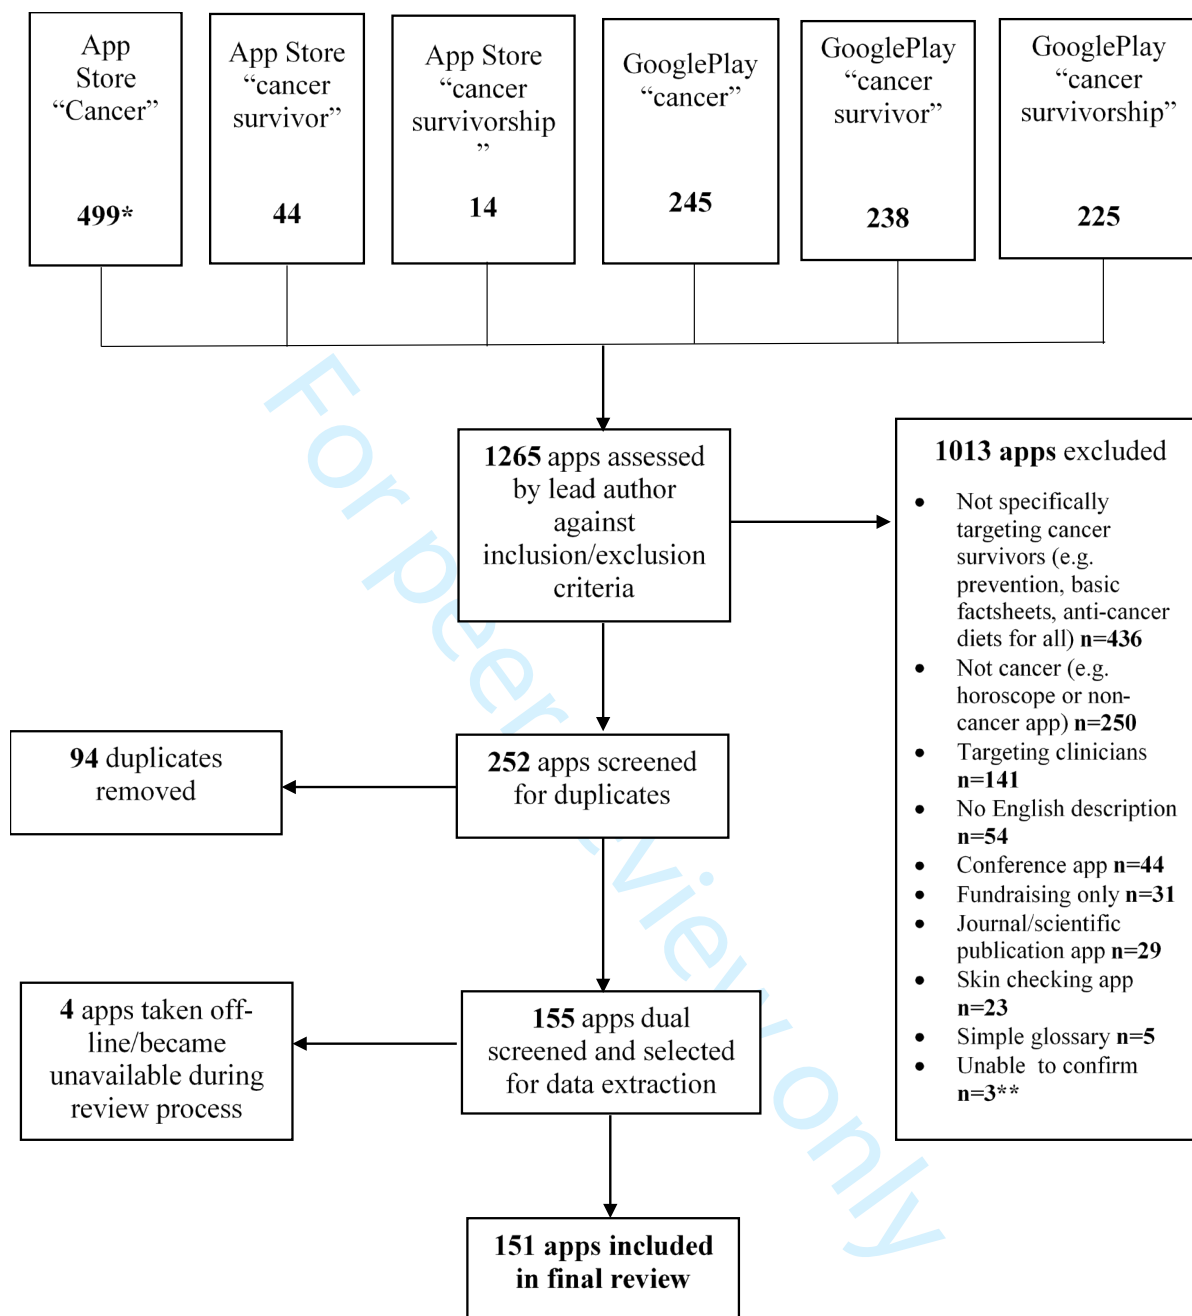

\*Apple's app store was searched up to and not including the 500<sup>th</sup> app on the on-line store: after several hundred apps, the apps became less relevant to our review

\*\* There were three apps which we were unable to find again after the initial searches: two (*faith.org*; and *ovarian cancer treatments (things to do)* seemed to be removed from the store, and there was an administrative error during recording the name of the third app, which led to a missing field in our exclusion file

**Table S1: Full list of apps and descriptive data extracted from stores.**

| Name of App                               | Name of developer                         | Cancer Type | Owner Nature*           | Country*    | Platform | Fee                       | Downloads (Google only) | Number of raters / (rating out of 5.0) Google | Number of raters / (rating out of 5.0) Apple \$ |
|-------------------------------------------|-------------------------------------------|-------------|-------------------------|-------------|----------|---------------------------|-------------------------|-----------------------------------------------|-------------------------------------------------|
| 1 in 3 Cancer Support                     | Origin Digital Limited                    | All         | Charity                 | UK          | Both     | Free                      | 10+                     | 1 (5.0)                                       | Not enough                                      |
| Adrenal cancer – others like me           | Eli Maliki                                | All         | Unclear                 | Unclear     | Google   | Free                      | 1000+                   | 2 (5.0)                                       | N/A                                             |
| Attack cancer using hypnosis              | Ron Eslinger (Healthy Visions)            | All         | Commercial              | USA         | Both     | £6.49 Google, £9.99 Apple | 10+                     | 2 (5.0)                                       | Not enough                                      |
| BCG Treatment                             | Rosewell Park Comprehensive cancer center | Bladder     | Healthcare organisation | USA         | Both     | Free                      | 50+                     | None                                          | Not enough                                      |
| BECCA – Breast cancer care app            | Breast cancer care                        | Breast      | Charity                 | UK          | Both     | Free                      | 5000+                   | 38 (4.5)                                      | 19 (4.5)                                        |
| BELONG Beating Cancer                     | BelongTail                                | All         | Commercial              | USA         | Both     | Free                      | 50000+                  | 661 (4.7)                                     | 29 (4.9)                                        |
| Best Prostate Cancer Treatment            | RL Technology LLC                         | Prostate    | Commercial              | Unclear     | Apple    | Free                      | N/A                     | N/A                                           | Not enough                                      |
| Bible verses for cancer – strength verses | Watchdis prayers                          | All         | Unclear                 | Netherlands | Google   | Free                      | 1000+                   | 26 (4.8)                                      | N/A                                             |
| BigC-Connect                              | Jane Boag                                 | All         | Charity                 | Singapore   | Both     | Free                      | 500+                    | 8 (5.0)                                       | Not enough                                      |
| Bladder Cancer Manager                    | point of care                             | Bladder     | Commercial              | USA         | Apple    | Free                      | N/A                     | N/A                                           | Not enough                                      |

|                                                |                                   |                |             |           |        |       |       |          |            |
|------------------------------------------------|-----------------------------------|----------------|-------------|-----------|--------|-------|-------|----------|------------|
| Blood cancer storylines                        | Self care catalyts                | Haematological | Commercial  | USA       | Both   | Free  | 50+   | none     | Not enough |
| Blood cancer treatment                         | Ahalya                            | Haematological | Unclear     | India     | Google | Free  | 500+  | 2 (5.0)  | N/A        |
| Boobytrapp                                     | Phoenix Consult PTE               | Breast         | Commercial  | Unclear   | Both   | Free  | 50+   | 2 (5.0)  | Not enough |
| Bowel Cancer                                   | Princeton Digital                 | Bowel          | Charity     | Australia | Both   | Free  | 1000+ | Missing  | Not enough |
| BRAVE Coalition                                | Tied Tech LLC                     | Breast         | Charity     | USA       | Apple  | Free  | N/A   | N/A      | Not enough |
| Breast Cancer Ally                             | University of Michigan            | Breast         | Academic    | USA       | Apple  | Free  | N/A   | N/A      | Not enough |
| Breast cancer Canada                           | Olive Branch of hope              | Breast         | Partnership | Canada    | Google | Free  | 10+   | none     | N/A        |
| Breast Cancer Diary                            | HomeInSync LLC                    | Breast         | Commercial  | USA       | Apple  | £4.99 | N/A   | N/A      | Not enough |
| Breast Cancer Healthline App                   | Healthline Networks Inc           | Breast         | Commercial  | USA       | Apple  | Free  | N/A   | N/A      | Not enough |
| Breast Cancer Manager                          | point of care                     | Breast         | Commercial  | USA       | Apple  | Free  | N/A   | N/A      | Not enough |
| Breast Cancer Social Network/My BC Team        | My Health teams                   | Breast         | Commercial  | USA       | Both   | Free  | 1000+ | 44 (4.2) | Not enough |
| Breast Cancer Survivor                         | Portable Medical technology Ltf   | Breast         | Charity     | Ireland   | Apple  | Free  | N/A   | N/A      | Not enough |
| Breast Cancer: Beyond the shock                | National breast cancer foundation | Breast         | Charity     | USA       | Apple  | Free  | N/A   | N/A      | Not enough |
| Breast cancer: information about breast cancer | Doctor Apps                       | Breast         | Commercial  | Unclear   | Google | Free  | 1000+ | 16 (4.6) | N/A        |

|                                         |                                                                |                    |                         |           |        |                           |         |          |            |
|-----------------------------------------|----------------------------------------------------------------|--------------------|-------------------------|-----------|--------|---------------------------|---------|----------|------------|
| Breast friends app                      | Barry O'Mahoney                                                | Breast             | Charity                 | USA       | Both   | Free                      | 10+     | None     | Not enough |
| Breast Cancer Gibraltar                 | Alan Pereira                                                   | Breast             | Charity                 | Gibraltar | Apple  | Free                      | N/A     | N/A      | Not enough |
| Bubble health                           | bubble health ltd                                              | Breast and ovarian | Commercial              | Unclear   | Both   | Free                      | 10+     | 2 (5.0)  | Not enough |
| CanAdvice+                              | MySmartHealth                                                  | Breast             | Healthcare organisation | UK        | Google | Free                      | 10+     | none     | N/A        |
| Cancel Cancer                           | Infinite Monkeys LLC                                           | All                | Commercial              | Unclear   | Apple  | Free                      | N/A     | N/A      | Not enough |
| Cancer awareness network                | Lewis Educational Consultants, Inc                             | All                | Charity                 | USA       | Both   | Free                      | 100+    | 10 (4.6) | Not enough |
| Cancer Care and Research News           | Dana-Farber Cancer Institute                                   | All                | Healthcare organisation | USA       | Apple  | Free                      | N/A     | N/A      | Not enough |
| Cancer chemotherapy and healing colours | (Ron) Michael Eslinger (Healthy Visions)                       | All                | Commercial              | USA       | Both   | £6.49 Google, £8.99 Apple | 10+     | 2 (3.0)  | Not enough |
| Cancer Connect                          | Maree Hamilton                                                 | All                | Commercial              | Australia | Apple  | Free                      | N/A     | N/A      | Not enough |
| Cancer cure                             | Balogh Jozsef Zoltan                                           | All                | Unclear                 | Hungary   | Google | £28.90                    | 1+      | none     | N/A        |
| Cancer curing foods                     | Proven Digital Web Solutions                                   | All                | Commercial              | India     | Google | Free                      | 10,000+ | 98 (4.4) | N/A        |
| Cancer defeated                         | Christopher DiCristo, MagnifyMobile                            | All                | Commercial              | USA       | Both   | Free                      | 100+    | 2 (2.0)  | Not enough |
| Cancer Emergency Response Tool          | Dorset cancer centre, developed by Portable Medical Technology | All                | Healthcare organisation | UK        | Apple  | Free                      | N/A     | N/A      | Not enough |
| Cancer fighting app                     | Bhaktiedge                                                     | All                | Unclear                 | Unclear   | Google | Free                      | 50+     | None     | N/A        |
| Cancer fighting foods                   | Ayoub Bousetta, B6Squad Dev.                                   | All                | Commercial              | Morocco   | Google | Free                      | 10,000+ | 29 (4.2) | N/A        |



|                                |                                                           |     |                  |                 |        |      |         |           |            |
|--------------------------------|-----------------------------------------------------------|-----|------------------|-----------------|--------|------|---------|-----------|------------|
| Cancer iChart                  | Liverpool Drug Interactions Group                         | All | Academic         | UK              | Both   | Free | 50+     | 2 (4.0)   | Not enough |
| Cancer Sites@Jeff              | Thomas Jefferson University                               | All | Academic         | USA             | Apple  | Free | N/A     | N/A       | Not enough |
| Cancer Support Community VVSB  | Cancer support community VVSB, developed by Globonet Inc. | All | Charity          | USA             | Apple  | Free | N/A     | N/A       | Not enough |
| Cancer Surveillance            | GoMLV                                                     | All | Commercial       | Unclear         | Google | Free | 1000+   | 21 (3.7)  | N/A        |
| Cancer survivorship connection | Peachtree Solutions LLC                                   | All | Partnership      | USA             | Both   | Free | 10+     | 1 (5.0)   | Not enough |
| Cancer Together                | Independent Energy Consultancy Research                   | All | Unclear          | France          | Both   | Free | 10+     | none      | Not enough |
| Cancer-track and heal          | Camille Madelon                                           | All | Commercial       | Unclear         | Apple  | Free | N/A     | N/A       | Not enough |
| Cancer Treatment Calendar      | Long Nguyen                                               | All | Commercial       | Unclear         | Apple  | Free | N/A     | N/A       | Not enough |
| Cancer treatment tips          | globalapps24                                              | All | Commercial       | Unclear         | Google | Free | 100+    | none      | N/A        |
| Cancer wellness                | S J Grant Unicorn Pacific Corps                           | All | Commercial       | Pacific Islands | Apple  | Free | N/A     | N/A       | Not enough |
| Cancer.Fitness Community       | MAWaza LLC                                                | All | Commercial       | USA             | Both   | Free | 50+     | none      | Not enough |
| Cancer.Net mobile              | ASCO                                                      | All | Clinical Society | USA             | Both   | Free | 10,000+ | 212 (4.3) | Not enough |
| CancerAid                      | CancerAid PTY Ltd                                         | All | Commercial       | >1              | Both   | Free | 1,000+  | 25 (3.7)  | Not enough |
| CancerIS                       | LemonMD                                                   | All | Commercial       | USA             | Apple  | Free | N/A     | N/A       | Not enough |

|                                   |                                                                             |            |                           |           |        |                              |      |          |            |
|-----------------------------------|-----------------------------------------------------------------------------|------------|---------------------------|-----------|--------|------------------------------|------|----------|------------|
| Cancerosity – cancer network      | Throwr Pty Ltd                                                              | All        | Commercial                | Australia | Apple  | Free                         | N/A  | N/A      | Not enough |
| CancerStop                        | Queromatics                                                                 | All        | Commercial                | USA       | Google | Free                         | 100+ | 15 (5.0) | N/A        |
| CanDi – cancer diet app           | Faculty of Health Sciences<br>University Universiti Sultan<br>Zainal Abidin | All        | Academic                  | Malaysia  | Google | Free                         | 500+ | 59 (4.7) | N/A        |
| CanHOPE cancer support            | LEAPP for Parkway Cancer Centre                                             | All        | Charity                   | Singapore | Apple  | Free                         | N/A  | N/A      | Not enough |
| CarcinoidNETs<br>HealthStorylines | Self care catalysts                                                         | Carcinoid  | Partnership               | USA       | Both   | Free                         | 500+ | 8 (4.2)  | Not enough |
| Chemo brain                       | Katharine Hargrove                                                          | All        | Commercial                | USA       | Google | Free                         | 100+ | 1 (5.0)  | N/A        |
| Chemotherapy                      | Rahul Baweja, Alpesh Patel                                                  | All        | Unclear                   | Unclear   | Both   | Free                         | 100+ | None     | Not enough |
| Cleveland Clinic Cancer Trials    | Cleveland Clinic Innovations                                                | All        | Healthcare organisation   | USA       | Apple  | Free                         | N/A  | N/A      | Not enough |
| ClinTrial refer breast cancer     | Haematology Clinical Research Network, New South Wales                      | Breast     | Clinical research network | >1        | Both   | Free                         | 100+ | 1 (5.0)  | Not enough |
| ClinTrial Refer Cancer Genetics   | Haematology Clinical Research Network, New South Wales                      | All        | Clinical research network | >1        | Both   | Free                         | 50+  | 1 (5.0)  | Not enough |
| ClinTrial Refer SA Cancer         | Haematology Clinical Research Network, New South Wales                      | All        | Clinical research network | Australia | Both   | Free                         | 10+  | None     | Not enough |
| Cnected                           | Get Cnected Ltd                                                             | All        | Commercial                | UK        | Apple  | Free                         | N/A  | N/A      | 14 (4.7)   |
| Colon cancer                      | (Ron) Michael Eslinger Healthy Visions                                      | Colorectal | Commercial                | USA       | Both   | £5.49 Google,<br>£8.99 Apple | 1+   | None     | Not enough |

|                                       |                                      |          |                         |           |        |         |         |          |            |
|---------------------------------------|--------------------------------------|----------|-------------------------|-----------|--------|---------|---------|----------|------------|
| Community guide for women with cancer | Charach Cancer Treatment Center      | All      | Healthcare organisation | USA       | Both   | Free    | 50+     | 2 (5.0)  | Not enough |
| Don't die 2                           | MiSong Foundation. Org               | All      | Unclear                 | USA       | Google | £299.99 | 0+      | None     | N/A        |
| E-home app questionnaires             | Alice Lee Centre for Nursing Studies | Breast   | Academic                | Singapore | Google | Free    | 10+     | None     | N/A        |
| Emory AWAKE                           | Emory University                     | All      | Academic                | USA       | Both   | Free    | 10+     | None     | Not enough |
| Eva: Cancer Support                   | Eva LLC                              | All      | Commercial              | USA       | Both   | Free    | 10+     | None     | Not enough |
| Eye cancer treatments                 | Things To Do                         | Eye      | Commercial              | Unclear   | Google | Free    | 10+     | None     | N/A        |
| Fight cancer naturally                | Dr Isaac's Holistic Wellness         | All      | Healthcare organisation | India     | Google | Free    | 100+    | 1 (1.0)  | N/A        |
| Focus on lymphoma                     | Lymphoma Research Foundation         | Lymphoma | Charity                 | USA       | Both   | Free    | 5,000+  | 53 (4.7) | 9 (4.4)    |
| For Cancer Care                       | AMC Energy Canada                    | All      | Commercial              | Canada    | Both   | Free    | 10+     | None     | Not enough |
| Hope abounds inc.                     | Hope Abounds Imc                     | All      | Charity                 | USA       | Both   | Free    | 10+     | None     | Not enough |
| iCancerHealth Cancer Care             | Medocity                             | All      | Commercial              | USA       | Both   | Free    | 1,000 + | 33 (4.4) | Not enough |
| Inkspiration                          | Crispin Porter & Bogusky             | Breast   | Charity                 | USA       | Apple  | Free    | N/A     | N/A      | Not enough |
| Inspiration of cancer survivor story  | CaveApps                             | All      | Commercial              | Malaysia  | Google | Free    | 10+     | None     | N/A        |
| It's a MANTHING – Prostate Cancer     | Prostaid                             | Prostate | Charity                 | UK        | Both   | Free    | 500+    | 5 (5.0)  | Not enough |

|    |                                          |                             |                   |             |         |        |                                     |      |         |            |
|----|------------------------------------------|-----------------------------|-------------------|-------------|---------|--------|-------------------------------------|------|---------|------------|
| 1  | Ketogenic therapy for cancer             | seawellsoft private Limited | All               | Commercial  | India   | Both   | £9.49<br>Google,<br>£12.99<br>Apple | 10+  | 6 (4.8) | Not enough |
| 2  | Kidney cancer health storylines          | self care catalysts         | Kidney            | Commercial  | >1      | Apple  | Free                                | N/A  | N/A     | Not enough |
| 3  | Kidney cancer manager                    | point of care               | Kidney            | Commercial  | USA     | Apple  | Free                                | N/A  | N/A     | Not enough |
| 4  | Kids cancer meds                         | David Ziegler               | All               | Commercial  | Unclear | Both   | Free                                | 10+  | None    | Not enough |
| 5  | Live like Cameron                        | Melisa Fulling/ Rooterdog   | Childhood cancers | Charity     | USA     | Both   | Free                                | 50+  | 1 (5.0) | Not enough |
| 6  | Liver cancer manager                     | point of care               | Liver             | Commercial  | USA     | Apple  | Free                                | N/A  | N/A     | Not enough |
| 7  | Living with cancer                       | Things To Do                | All               | Commercial  | Unclear | Google | Free                                | 100+ | None    | N/A        |
| 8  | Loving meditations                       | Mind Health LLC             | All               | Commercial  | USA     | Both   | Free                                | 10+  | Missing | Not enough |
| 9  | Lung Cancer Foundation                   | Open cancer network         | Lung              | Charity     | USA     | Apple  | Free                                | N/A  | N/A     | Not enough |
| 10 | Lung Cancer Manager                      | point of care               | Lung              | Commercial  | USA     | Apple  | Free                                | N/A  | N/A     | Not enough |
| 11 | Lung cancer navigator                    | Lungevity foundation        | Lung              | Charity     | USA     | Both   | Free                                | 100+ | 2 (3.0) | Not enough |
| 12 | Lung cancer treatment                    | Things To Do                | Lung              | Commercial  | Unclear | Google | Free                                | 100+ | None    | N/A        |
| 13 | Malecare prostate cancer                 | Malecare                    | Prostate          | Charity     | USA     | Apple  | Free                                | N/A  | N/A     | Not enough |
| 14 | Markey cancer center clinical trials app | University of Kentucky      | All               | Partnership | USA     | Apple  | Free                                | N/A  | N/A     | Not enough |

|                                                   |                                                                |                             |                         |         |        |                           |         |           |            |
|---------------------------------------------------|----------------------------------------------------------------|-----------------------------|-------------------------|---------|--------|---------------------------|---------|-----------|------------|
| MASCC Antiemesis Tool                             | Multinational Association of Supportive Care in Cancer (MASCC) | All                         | Partnership             | USA     | Both   | Free                      | 1000+   | 8 (4+)    | Not enough |
| MD Anderson Mobile                                | MD Anderson cancer center                                      | All                         | Healthcare organisation | USA     | Both   | Free                      | 10,000+ | 305 (4.2) | Not enough |
| Melanoma UK                                       | Melanoma UK and Vitaccess LTd                                  | Melanoma                    | Partnership             | UK      | Both   | Free                      | 100+    | 2 (5.0)   | Not enough |
| Merry medicine                                    | 9wise                                                          | All                         | Commercial              | >1      | Google | £7.49                     | 1+      | 1 (5.0)   | N/A        |
| Mesothelioma Malignant Tumor Staging chemotherapy | Eduardo D'Avila                                                | Mesothelioma                | Unclear                 | USA     | Google | Free                      | 50+     | 4 (5.0)   | N/A        |
| MeTime Acupressure                                | University of Michigan                                         | All                         | Academic                | USA     | Both   | £9.49 Google, £9.99 Apple | 5+      | None      | Not enough |
| Mindful cancer                                    | Gordon Mullins                                                 | All                         | Unclear                 | Unclear | Apple  | Free                      | N/A     | N/A       | Not enough |
| Mouth cancer treatment                            | Things To Do                                                   | Oral                        | Commercial              | Unclear | Google | Free                      | 100+    | None      | N/A        |
| MVR Cancer Centre                                 | MVR Cancer Centre and research institute, Calicut              | All                         | Healthcare organisation | India   | Google | Free                      | 100+    | 5 (5.0)   | N/A        |
| My breast cancer advocate                         | Pathways2healing.us                                            | Breast                      | Commercial              | USA     | Google | £1.22                     | 10+     | 3 (5.0)   | N/A        |
| My Cancer Coach                                   | Genomic health                                                 | Breast, prostate, and colon | Partnership             | USA     | Both   | Free                      | 10,000+ | 65 (4.4)  | Not enough |
| My Care Plan – cancer survivors                   | Journey forward                                                | All                         | Partnership             | USA     | Both   | Free                      | 500+    | 4 (4.0)   | Not enough |
| My Head & Neck Cancer Manager                     | point of care                                                  | Head and neck               | Commercial              | USA     | Apple  | Free                      | N/A     | N/A       | Not enough |

|                                           |                                                           |                     |                         |         |        |      |        |          |            |
|-------------------------------------------|-----------------------------------------------------------|---------------------|-------------------------|---------|--------|------|--------|----------|------------|
| My liver                                  | AGF studios Ltd for National Health Service               | Liver               | Healthcare organisation | UK      | Apple  | Free | N/A    | N/A      | 14 (5.0)   |
| My Pancreas                               | AGF studios Ltd for National Health Service               | Pancreatic          | Healthcare organisation | UK      | Apple  | Free | N/A    | N/A      | 7 (5.0)    |
| My Prostate Cancer Manager                | point of care                                             | Prostate            | Commercial              | USA     | Apple  | Free | N/A    | N/A      | Not enough |
| MyMSK                                     | Memorial Sloan-Kettering Cancer Center                    | All                 | Healthcare organisation | USA     | Both   | Free | 1,000+ | 4 (3.8)  | Not enough |
| NCCN Patient Guides for Cancer            | National Comprehensive Cancer Network                     | All                 | Charity                 | USA     | Both   | Free | 1,000+ | 4 (4.5)  | Not enough |
| NED for prostate cancer                   | University Health Network, Toronto                        | Prostate            | Academic                | Canada  | Both   | Free | 10+    | None     | Not enough |
| ONCompanion                               | ONCompanion foundation programmed by we builld technology | All                 | Charity                 | India   | Google | Free | 10+    | 3 (5.0)  | N/A        |
| OneRemission                              | OneRemission                                              | All                 | Commercial              | USA     | Apple  | Free | N/A    | N/A      | Not enough |
| Ovarian Cancer Symptoms Diary             | Ovarian Cancer Action (programmed by electric putty)      | Ovarian             | Charity                 | UK      | Both   | Free | 1,000+ | 7 (4.3)  | Not enough |
| OWise breast cancer                       | Px Healthcare B.V. Ltd                                    | Breast              | Commercial              | >1      | Both   | Free | 1,000+ | 10 (4.4) | Not enough |
| Oxford Cancer and Haematology Outpatients | Oxford University Hospitals NHS foundation                | All                 | Healthcare organisation | UK      | Apple  | Free | N/A    | N/A      | Not enough |
| Personalized sarcoma care                 | Mobile Pioneers BV                                        | Soft tissue sarcoma | Unclear                 | Unclear | Both   | Free | 100+   | 8 (4+)   | Not enough |
| Phil's friends                            | Phils friends organisation, developed by subplash inc     | All                 | Charity                 | USA     | Both   | Free | 50+    | 1 (5.0)  | Not enough |
| PM Cancer Journey                         | University Health Network, Toronto                        | All                 | Partnership             | Canada  | Both   | Free | 500+   | 6 (4.8)  | Not enough |

|                                                 |                                                                          |                |                         |           |        |      |        |          |            |
|-------------------------------------------------|--------------------------------------------------------------------------|----------------|-------------------------|-----------|--------|------|--------|----------|------------|
| Pocket Cancer Care Guide                        | National Coalition for Cancer Survivorship                               | All            | Charity                 | USA       | Apple  | Free | N/A    | N/A      | Not enough |
| Pratheeksha                                     | Pratheeksha clinic                                                       | All            | Healthcare organisation | India     | Both   | Free | 100+   | 14 (4.8) | Not enough |
| Prostate cancer support group Gibraltar         | Prostate cancer support group, Gibraltar, developed by Alan Pereira      | Prostate       | Charity                 | Gibraltar | Apple  | Free | N/A    | N/A      | Not enough |
| Prostate cancer treatment                       | Creative live apps                                                       | Prostate       | Unclear                 | Unclear   | Google | Free | 10+    | None     | N/A        |
| Prostate cancer we have your back               | Infinite Monkeys LLC                                                     | Prostate       | Unclear                 | Unclear   | Apple  | Free | N/A    | N/A      | Not enough |
| Qigong for cancer healing and prevention        | Yang's Martial Arts Association Publication Center, Inc.                 | All            | Commercial              | USA       | Both   | Free | 100+   | None     | Not enough |
| Radiotherapy                                    | incroyable future for skin safety.com                                    | All            | Commercial              | Canada    | Google | Free | 50+    | None     | N/A        |
| RB-World App                                    | KinderAugenKrebsStiftung KAKS (Childrens' eye cancer foundation Germany) | Retinoblastoma | Charity                 | Germany   | Both   | Free | 100+   | 2 (4+)   | Not enough |
| Safe and easy cancer/ Easy ways to treat cancer | 999 Apps Developer                                                       | All            | Unclear                 | Unclear   | Google | Free | 10+    | 1 (5.0)  | N/A        |
| SCICancer Clinical Trials                       | Stanford University                                                      | All            | Partnership             | USA       | Both   | Free | 100+   | None     | Not enough |
| Self Care During Cancer                         | Nearspace inc for genetech inc, anthem inc                               | All            | Partnership             | USA       | Both   | Free | 1,000+ | 6 (4.7)  | Not enough |
| Signs and symptoms breast cancer                | Built By Doctors Ltd                                                     | Breast         | Commercial              | USA       | Both   | Free | 100+   | None     | Not enough |
| Skin Cancer Manager                             | point of care                                                            | Skin           | Commercial              | USA       | Apple  | Free | N/A    | N/A      | Not enough |

|                                |                                            |            |                         |             |        |      |        |          |            |
|--------------------------------|--------------------------------------------|------------|-------------------------|-------------|--------|------|--------|----------|------------|
| Stupid Cancer                  | Gryt health for stupid cancer.org          | All        | Charity                 | USA         | Both   | Free | 1,000+ | 10 (3.9) | Not enough |
| Super food to fight for cancer | cyclonblast mobile apps                    | All        | Unclear                 | unclear     | Google | Free | 100+   | 3 (4.3)  | N/A        |
| Survivor care                  | University medical centre Groningen        | All        | Healthcare organisation | Netherlands | Apple  | Free | N/A    | N/A      | Not enough |
| SwiSupport – HealingMusic      | Jun-Wei Su                                 | All        | Commercial              | Unclear     | Apple  | Free | N/A    | N/A      | Not enough |
| T.I.N.A                        | Kognito                                    | All        | Partnership             | USA         | Both   | Free | 10+    | None     | Not enough |
| Testicular cancer              | Expert health studios                      | Testicular | Commercial              | unclear     | Google | Free | 5,000+ | 13 (3.8) | N/A        |
| Thrivor                        | thrivor pty ltd                            | All        | Commercial              | unclear     | Both   | Free | 100+   | 4 (5.0)  | Not enough |
| Treat prostate cancer          | martinandoapp                              | Prostate   | Commercial              | unclear     | Google | Free | 500+   | 1 (5.0)  | Not enough |
| Treating bladder cancer        | NonitaDev                                  | Bladder    | Unclear                 | unclear     | Google | Free | 50+    | None     | N/A        |
| Triple negative breast cancer  | Kognito                                    | Breast     | Partnership             | USA         | Both   | Free | 100+   | 1 (5.0)  | Not enough |
| Twist out cancer               | Rochishna Aloor                            | All        | Charity                 | >1          | Apple  | Free | N/A    | N/A      | Not enough |
| Types of cancer treatment      | Dinatale                                   | All        | Commercial              | Unclear     | Google | Free | 100+   | 2 (3.0)  | N/A        |
| Untire: Beating cancer fatigue | tired of cancer                            | All        | Charity                 | Netherlands | Both   | Free | 1,000+ | 43 (4.5) | Not enough |
| Various cancer cures           | EmirZIApps                                 | All        | Commercial              | unclear     | Google | Free | 500+   | 2 (3.0)  | N/A        |
| Ways to fight off cancer       | Koodalappz on android, sathish bc on apple | All        | Commercial              | unclear     | Both   | Free | 1,000+ | 3 (5.0)  | N/A        |



|                 |                 |     |            |       |        |      |     |      |            |
|-----------------|-----------------|-----|------------|-------|--------|------|-----|------|------------|
| Whip Cancer     | Copley Raff Inc | All | Commercial | USA   | Apple  | Free | N/A | N/A  | Not enough |
| Yoga vs. cancer | Antioch studio  | All | Commercial | Spain | Google | Free | 10+ | None | N/A        |

\*The nature of the owner and country of origin was open to a degree of interpretation/judgement by the authors, and therefore we involved two authors in extracting this data independently. Linked websites were visited. There were high levels of agreement and we reached consensus by discussion. We have applied the term “charity” to cover non-profit organisations.

\$Google Play will publish a “star” rating when there is one or more reviews of the app. Many of the apps available via Apple’s app store reported that there were not enough reviews to present a star rating. Ratings were accurate to November 2018.

## Preferred Reporting Items for Systematic reviews and Meta-Analyses extension for Scoping Reviews (PRISMA-ScR) Checklist

| SECTION                           | ITEM | PRISMA-ScR CHECKLIST ITEM                                                                                                                                                                                                                                                                                  | REPORTED ON PAGE #                     |
|-----------------------------------|------|------------------------------------------------------------------------------------------------------------------------------------------------------------------------------------------------------------------------------------------------------------------------------------------------------------|----------------------------------------|
| <b>TITLE</b>                      |      |                                                                                                                                                                                                                                                                                                            |                                        |
| Title                             | 1    | Identify the report as a scoping review.                                                                                                                                                                                                                                                                   | 1                                      |
| <b>ABSTRACT</b>                   |      |                                                                                                                                                                                                                                                                                                            |                                        |
| Structured summary                | 2    | Provide a structured summary that includes (as applicable): background, objectives, eligibility criteria, sources of evidence, charting methods, results, and conclusions that relate to the review questions and objectives.                                                                              | 2                                      |
| <b>INTRODUCTION</b>               |      |                                                                                                                                                                                                                                                                                                            |                                        |
| Rationale                         | 3    | Describe the rationale for the review in the context of what is already known. Explain why the review questions/objectives lend themselves to a scoping review approach.                                                                                                                                   | 3                                      |
| Objectives                        | 4    | Provide an explicit statement of the questions and objectives being addressed with reference to their key elements (e.g., population or participants, concepts, and context) or other relevant key elements used to conceptualize the review questions and/or objectives.                                  | 3                                      |
| <b>METHODS</b>                    |      |                                                                                                                                                                                                                                                                                                            |                                        |
| Protocol and registration         | 5    | Indicate whether a review protocol exists; state if and where it can be accessed (e.g., a Web address); and if available, provide registration information, including the registration number.                                                                                                             | X, reported in limitations, discussion |
| Eligibility criteria              | 6    | Specify characteristics of the sources of evidence used as eligibility criteria (e.g., years considered, language, and publication status), and provide a rationale.                                                                                                                                       | 5                                      |
| Information sources*              | 7    | Describe all information sources in the search (e.g., databases with dates of coverage and contact with authors to identify additional sources), as well as the date the most recent search was executed.                                                                                                  | 5                                      |
| Search                            | 8    | Present the full electronic search strategy for at least 1 database, including any limits used, such that it could be repeated.                                                                                                                                                                            | 5                                      |
| Selection of sources of evidence† | 9    | State the process for selecting sources of evidence (i.e., screening and eligibility) included in the scoping review.                                                                                                                                                                                      | 5                                      |
| Data charting process‡            | 10   | Describe the methods of charting data from the included sources of evidence (e.g., calibrated forms or forms that have been tested by the team before their use, and whether data charting was done independently or in duplicate) and any processes for obtaining and confirming data from investigators. | 6                                      |
| Data items                        | 11   | List and define all variables for which data were sought and any assumptions and simplifications made.                                                                                                                                                                                                     | 6                                      |
| Critical appraisal of individual  | 12   | If done, provide a rationale for conducting a critical appraisal of included sources of evidence; describe                                                                                                                                                                                                 | Not done                               |

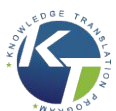

| SECTION                                       | ITEM | PRISMA-ScR CHECKLIST ITEM                                                                                                                                                                       | REPORTED ON PAGE #        |
|-----------------------------------------------|------|-------------------------------------------------------------------------------------------------------------------------------------------------------------------------------------------------|---------------------------|
| sources of evidence§                          |      | the methods used and how this information was used in any data synthesis (if appropriate).                                                                                                      |                           |
| Synthesis of results                          | 13   | Describe the methods of handling and summarizing the data that were charted.                                                                                                                    | 7                         |
| <b>RESULTS</b>                                |      |                                                                                                                                                                                                 |                           |
| Selection of sources of evidence              | 14   | Give numbers of sources of evidence screened, assessed for eligibility, and included in the review, with reasons for exclusions at each stage, ideally using a flow diagram.                    | 23                        |
| Characteristics of sources of evidence        | 15   | For each source of evidence, present characteristics for which data were charted and provide the citations.                                                                                     | Supplementary data        |
| Critical appraisal within sources of evidence | 16   | If done, present data on critical appraisal of included sources of evidence (see item 12).                                                                                                      | Not done                  |
| Results of individual sources of evidence     | 17   | For each included source of evidence, present the relevant data that were charted that relate to the review questions and objectives.                                                           | 7-17                      |
| Synthesis of results                          | 18   | Summarize and/or present the charting results as they relate to the review questions and objectives.                                                                                            | 7-17                      |
| <b>DISCUSSION</b>                             |      |                                                                                                                                                                                                 |                           |
| Summary of evidence                           | 19   | Summarize the main results (including an overview of concepts, themes, and types of evidence available), link to the review questions and objectives, and consider the relevance to key groups. | 18                        |
| Limitations                                   | 20   | Discuss the limitations of the scoping review process.                                                                                                                                          | 20                        |
| Conclusions                                   | 21   | Provide a general interpretation of the results with respect to the review questions and objectives, as well as potential implications and/or next steps.                                       | 21                        |
| <b>FUNDING</b>                                |      |                                                                                                                                                                                                 |                           |
| Funding                                       | 22   | Describe sources of funding for the included sources of evidence, as well as sources of funding for the scoping review. Describe the role of the funders of the scoping review.                 | Click here to enter text. |

JB1 = Joanna Briggs Institute; PRISMA-ScR = Preferred Reporting Items for Systematic reviews and Meta-Analyses extension for Scoping Reviews.

\* Where *sources of evidence* (see second footnote) are compiled from, such as bibliographic databases, social media platforms, and Web sites.

† A more inclusive/heterogeneous term used to account for the different types of evidence or data sources (e.g., quantitative and/or qualitative research, expert opinion, and policy documents) that may be eligible in a scoping review as opposed to only studies. This is not to be confused with *information sources* (see first footnote).

‡ The frameworks by Arksey and O'Malley (6) and Levac and colleagues (7) and the JBI guidance (4, 5) refer to the process of data extraction in a scoping review as data charting.

§ The process of systematically examining research evidence to assess its validity, results, and relevance before using it to inform a decision. This term is used for items 12 and 19 instead of "risk of bias" (which is more applicable to systematic reviews of interventions) to include and acknowledge the various sources of evidence that may be used in a scoping review (e.g., quantitative and/or qualitative research, expert opinion, and policy document).

From: Tricco AC, Lillie E, Zarin W, O'Brien KK, Colquhoun H, Levac D, et al. PRISMA Extension for Scoping Reviews (PRISMA-ScR): Checklist and Explanation. *Ann Intern Med.* ;169:467–473. doi: 10.7326/M18-0850

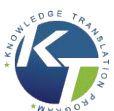

St. Michael's

Inspired Care.  
Inspiring Science.

For peer review only - <http://bmjopen.bmj.com/site/about/guidelines.xhtml>

# BMJ Open

## Publicly available apps for Cancer Survivors: a scoping review

|                                 |                                                                                                                                                                                                                                                                                                                                                                                                                               |
|---------------------------------|-------------------------------------------------------------------------------------------------------------------------------------------------------------------------------------------------------------------------------------------------------------------------------------------------------------------------------------------------------------------------------------------------------------------------------|
| Journal:                        | <i>BMJ Open</i>                                                                                                                                                                                                                                                                                                                                                                                                               |
| Manuscript ID                   | bmjopen-2019-032510.R1                                                                                                                                                                                                                                                                                                                                                                                                        |
| Article Type:                   | Original research                                                                                                                                                                                                                                                                                                                                                                                                             |
| Date Submitted by the Author:   | 22-Aug-2019                                                                                                                                                                                                                                                                                                                                                                                                                   |
| Complete List of Authors:       | Adam, Rosalind; University of Aberdeen College of Life Sciences and Medicine, Academic Primary Care<br>McMichael, Drew; University of Aberdeen College of Life Sciences and Medicine, Academic Primary Care<br>Powell, Daniel; University of Aberdeen, Aberdeen Health Psychology Group, Institute of Applied Health Sciences, Rowett Institute<br>Murchie, Peter; University of Aberdeen, Division of Applied Health Science |
| <b>Primary Subject Heading</b>: | Oncology                                                                                                                                                                                                                                                                                                                                                                                                                      |
| Secondary Subject Heading:      | Health informatics                                                                                                                                                                                                                                                                                                                                                                                                            |
| Keywords:                       | ONCOLOGY, Health informatics < BIOTECHNOLOGY & BIOINFORMATICS, Information technology < BIOTECHNOLOGY & BIOINFORMATICS, Telemedicine < BIOTECHNOLOGY & BIOINFORMATICS, World Wide Web technology < BIOTECHNOLOGY & BIOINFORMATICS, Cancer                                                                                                                                                                                     |
|                                 |                                                                                                                                                                                                                                                                                                                                                                                                                               |

SCHOLARONE™  
Manuscripts

## Publicly available apps for Cancer Survivors: a scoping review

Corresponding author: Rosalind Adam. Academic Primary Care, Institute of Applied Health Sciences, University of Aberdeen, Room 1:020, Polwarth Building, Foresterhill, Aberdeen, UK. AB25 2ZD.

Email [rosalindadam@abdn.ac.uk](mailto:rosalindadam@abdn.ac.uk).

Telephone +44 (0)1224 437906.

Fax +44 (0)1224 437971.

Drew McMichael, Medical Student, University of Aberdeen, UK

Daniel Powell, Aberdeen Health Psychology Group, Institute of Applied Health Sciences, University of Aberdeen, Aberdeen, UK; Rowett Institute, University of Aberdeen, Aberdeen, UK

Peter Murchie. Academic Primary Care, Institute of Applied Health Sciences, University of Aberdeen, UK.

**Word Count** = 4,717

## Abstract

**Objectives:** To review the nature and scope of apps targeting individuals living with and beyond cancer.

**Design:** Scoping review, searching the two largest app stores, Google Play, and Apple's App store. App descriptions were exported verbatim, and summarised descriptively, thematically, and by content coding.

**Results:** We included 151 apps targeting individuals living with and beyond cancer. Most targeted all cancer types (n=89, 58.9%) or breast cancer (n=22, 14.6%), and originated in the USA (n=68, 45.0%). The country of origin was unclear for 31 (20.5%) apps. Most apps were developed by commercial companies/private individuals (n=64, 43%) or non-profit organisations (n=30, 19.9%) and marketed apps in terms of fighting metaphors, navigating a journey, and becoming empowered to take control.

App content could be summarised under five main categories: 1. Imparting information about cancer 2. Planning and organising cancer care 3. Interacting with others (including others affected by cancer, and healthcare professionals) 4. Enacting management strategies, and adjusting to life with or beyond cancer 5. Getting feedback about cancer management, for example, by sharing self-monitoring reports with professionals. We found some apps describing "cures" for cancer, or selling products such as alkaline waters to cancer survivors.

**Conclusions:** Apps are currently available via online stores that cover a large spectrum of cancer survivorship activities. The effects of such apps on clinical consultations, patient work/burden, and clinical outcomes merit further attention. Most apps are developed by commercial organisations, and promises of empowerment in the "fight" against cancer are tempered by the potential for exaggerated claims and exploitation.

**Keywords:** Cancer, Mobile Applications, Telemedicine, Cancer Survivor

## Article Summary

### Strengths and Limitations of this study

- Scoping review categorising and summarising a wide range of apps available for cancer survivors on on-line stores
- Content and thematic analysis based on verbatim descriptions from the stores
- Individual apps not downloaded or quality assessed

### Introduction

The number of individuals living with and beyond cancer (also known as cancer survivors) is increasing (1,2). In the United Kingdom, it is estimated that the number of cancer survivors will grow by approximately one million every decade, from 2.1 million in 2010 to 5.3 million in 2040 (2). Cancer is increasingly being regarded as a chronic disease due to the growing number of individuals who are living with cancer, or surviving cancer (3) with long-term symptoms (4) and late effects of cancer treatment (5). Cancer survivors can experience increased physical, psychological, and social issues after their diagnosis, (6) accompanied by a range of unmet needs (7). There is growing political and clinical interest in utilising digital technologies to deliver efficient, high quality care for cancer survivors (8) and to empower patients to perform self-management activities (9).

The market for apps, including health apps is growing rapidly (10,11) with an estimated 318,000 health apps available in 2017(12). It is estimated that over 200 health apps are added daily to app stores (13). Against this changing technological environment, attempts to summarise and evaluate healthcare apps in traditional systematic reviews are limited by the relatively small proportion of technologies which are reported in published literature (14,15). An alternative strategy has been to identify and review apps that are available for download via on-line stores (16–18) .

1  
2  
3 In 2012, Bender et al searched online stores to characterise the purpose and content of apps  
4 focusing on any aspect of cancer (19). Of 295 cancer apps, most were limited in their scope,  
5 focusing primarily on providing information and raising awareness about cancer in general,  
6 and promoting/fundraising for charities (19). In 2014, Kassianos et al searched on-line stores  
7 for melanoma detection apps, identifying 39 apps. Most gave education or advice about  
8 melanoma, ultraviolet radiation exposure, and skin self-examination strategies (20).  
9  
10  
11  
12  
13  
14  
15  
16

17 Relatively little is known about apps targeting people living with and beyond cancer. Dahlke  
18 et al conducted a review to identify behaviour change techniques (21) (BCTs) embedded in  
19 cancer survivorship apps, searching app stores in November 2013 (22). Eighteen BCTs were  
20 present across 65 apps, including providing instruction, tailoring (for example, adjusting the  
21 information delivered based on user input), personalisation (for example, the user can select  
22 elements specific to them such as disease type), and prompting intention formation. What  
23 was less clear were the range of behaviours targeted, the aims and scope of the apps, how the  
24 BCTs were operationalised and organised, and where the technology itself might add value to  
25 survivorship care.  
26  
27  
28  
29  
30  
31  
32  
33  
34  
35  
36  
37  
38

39 The aim of this review is to characterise apps targeting individuals living with and beyond  
40 cancer that are currently available for download via the two major app stores (Google Play  
41 and Apple's App Store), which have been estimated to contain over ninety percent of all apps  
42 (20). The review will provide a summary of the apps' advertised components, stated aims,  
43 and technological features. We aim to categorise and organise the apps such that clinicians,  
44 app developers, and policy makers can make sense of the current international app market for  
45 people living with and beyond cancer.  
46  
47  
48  
49  
50  
51  
52  
53  
54  
55  
56  
57  
58  
59  
60



## Methods

We performed a scoping review,(23) searching Apple’s App Store and Google Play to identify apps targeting people living with and beyond cancer, and used content analysis (24) to characterise advertised content. Scoping reviews differ from traditional systematic reviews in that they map a topic in order to communicate the breadth and depth of the field,(25) and do not tend to involve formal quality assessment of the evidence (23). They describe the “extent, range, and nature” (23) of the available evidence, and set it in context in terms of current understanding. Scoping reviews require analytical interpretation of the subject area (26). They are particularly useful when synthesis involves non-research material,(26) and for emerging areas of research.

In this scoping review, we did not download and interact with the apps or test quality or functionality. In a previous review, Kassianos et al used app store summaries and were able to yield detailed descriptions of melanoma app content (20). Based on older reviews,(19,22) we expected to find a large number of apps, and in this rapidly changing field, the time required to interact with each app would lead to significant delays in communicating our findings. We wished to include paid apps, and had limited resources to buy individual apps for multiple authors. We also wished to include any apps affiliated with specific centres or clinical trials which would require log in credentials.

### Search strategy

Initial searches were conducted by two authors, DM and RA, who refined the search criteria. The lead author then searched the two leading app stores, Apple’s App store (we used an iPhone with iOS operating system), and Android’s Google Play (we used a PC with Windows operating system) in September 2018 using the keywords “cancer”, “cancer survivor”, and “cancer survivorship”.

### Inclusion and exclusion criteria

We included: apps aimed at patients living with and beyond cancer; free and paid apps from any country; apps that included pre-diagnosis support and information (so long as they also specifically targeted individuals living with and beyond cancer); and apps covering more than one clinical condition, so long as cancer was a named condition.

We excluded: apps unavailable in English or without English descriptions; simple awareness raising or pre-diagnosis apps (apps raising awareness of symptoms that were potentially indicative of cancer or risk assessment tools, skin/mole checking apps for individuals without a diagnosis of skin cancer, simple factsheets about a certain cancer type, or glossaries); and recipe and diet apps that were not specifically targeting patients living with and beyond cancer.

Apple's App store operates a "continuous scroll" function, meaning that the store loads content continuously to return results. General search terms or keywords (e.g. "cancer") can result in "endless scrolling" or "infinite scrolling", where results are continuously returned without an apparent end point. Our initial scoping searches showed that apps became much less relevant after the first few hundred results, and we decided to limit our search of Apple's App store to the first 500 results for the term "cancer". The online stores are not set up to allow search results to be exported, and decisions about inclusion and exclusion were made by a single author (RA). Eligibility was determined from the descriptions of the apps within the app stores. Descriptions of the final apps selected for inclusion were reviewed by a second author (DM) to ensure that apps met the eligibility criteria.

### Data extraction and synthesis

A data extraction form was created in Microsoft Excel and two researchers (RA and DM) independently extracted data from all apps that met the inclusion criteria. Data were obtained

1  
2  
3 from the stores' on-line app descriptions, principally the narrative text, but notes were also  
4 taken based upon screenshots of the apps within the store. These notes were added to  
5  
6 summarise any visible content from the screenshots which was in image form but not directly  
7  
8 mentioned in the app description. Verbatim text from the screenshots was imported where  
9  
10 available. We searched for and visited developer websites when available in order to gather  
11  
12 background information on the app, particularly with respect to the nature of the organisation  
13  
14 involved in app development (e.g. non-profit organisation or charity, commercial, academic)  
15  
16 and country of origin.  
17  
18  
19  
20  
21

22 Data were extracted on: cancer type(s); name of owner and/or developer (sometimes the  
23  
24 same); country of origin; operating system (Apple/Android/both); fee to download; type of  
25  
26 owner (charity, commercial, academic institution, healthcare provider, combination); number  
27  
28 of downloads (available on Google Play only); star rating and the presence/absence of a  
29  
30 statement about clinical or scientific input into app development. Data on number of  
31  
32 downloads, and star ratings were extracted by the lead author alone, as this was judged to be  
33  
34 a changing parameter. Data were imported into SPSS version 24, and descriptive statistics  
35  
36 were calculated.  
37  
38  
39  
40

41 The text description of the app given in the online store was copied verbatim and imported  
42  
43 into Microsoft Word. We used content analysis (24) and thematic analysis (27) to organise,  
44  
45 categorise, and synthesise qualitative data. App descriptions and accompanying notes were  
46  
47 imported into NVivo version 11. Data familiarisation took place by reading and re-reading  
48  
49 app descriptions. Initial codes were generated by the lead author in order to organise the data  
50  
51 into meaningful groups and these were discussed with a second author (DP) (28) Codes were  
52  
53 sorted into categories, based on how the codes were related and linked. Each app was then  
54  
55 analysed independently by two reviewers (RA and DM) to categorise the advertised content.  
56  
57  
58  
59  
60 The reviewers were alert to any content which did not fit the categories. We also analysed

1  
2  
3 themes within the language used to describe the apps. Reviewers met after the data  
4  
5  
6 categorisation exercise and compared results, reaching consensus by discussion.  
7

### 8 Patient and Public Involvement

9  
10  
11 We did not involve patients or the public in this scoping review, but rather plan to use the  
12  
13  
14 results to inform technology co-design projects which involve patients and the public.  
15

### 16 **Results**

17  
18  
19 We screened 1265 apps and included 151 in our final synthesis (see flow chart, Figure 1).  
20  
21  
22 The main reasons for exclusion were apps not specifically targeting cancer survivors, only  
23  
24  
25 targeting clinicians, or not relating to cancer. Four apps (*Cancer Stage IV Cure Methodology*,  
26  
27  
28 *Driver*, *Inspire*, and *NIH Breast Cancer Information*) became unavailable during our data  
29  
30  
31 analysis process between 8<sup>th</sup> September 2018 and 24<sup>th</sup> May 2019, and were excluded because  
32  
33  
34 we were unable to return to the on-line descriptions to check accuracy during dual data  
35  
36  
37 extraction.  
38

39  
40  
41 A full list of included apps, data on star ratings, and the raw data used in our analyses are  
42  
43  
44 included as a supplementary data file. App names will be reported in Italics throughout our  
45  
46  
47 results.  
48

### 49 **App demographics**

50  
51  
52 Characteristics of the apps are provided in Table 1. Of note, most of the apps covered all  
53  
54  
55 cancer types (n = 89, 58.9%) or were specific to breast cancer (n = 22, 14.6%). Over 90  
56  
57  
58 percent were free to download. Apps were developed by a mix of private  
59  
60  
61 companies/individuals (n = 64, 43%), charity/non-profit organisations (n = 30, 19.9%),  
62  
63  
64 healthcare organisations (n = 15, 9.9%) and academic institutions (n = 8, 5.3%). We found  
65  
66  
67 apps sharing the same developer and with similar content, but differing by cancer type: Eight  
68  
69  
70 apps were developed by “@point of care”, and five apps developed by “Self-care catalysts”,  
71

1  
2  
3 both commercial developers based in the USA. The nature of the developer could not be  
4  
5 determined for 16 apps (10.6%).  
6  
7  
8  
9  
10  
11  
12  
13  
14  
15  
16  
17  
18  
19  
20  
21  
22  
23  
24  
25  
26  
27  
28  
29  
30  
31  
32  
33  
34  
35  
36  
37  
38  
39  
40  
41  
42  
43  
44  
45  
46  
47  
48  
49  
50  
51  
52  
53  
54  
55  
56  
57  
58  
59  
60

For peer review only

**Table 1: Description of apps targeting individuals living with and beyond cancer available on Apple's App Store and Google Play**

| <b>Cancer Types Covered</b>                                             | <b>Number (N)<br/>(all apps,<br/>N=151 N (%)</b> | <b>Unique<br/>to Apple<br/>N=47,<br/>N (%)</b> | <b>Unique<br/>to Google<br/>N=38<br/>N (%)</b> |
|-------------------------------------------------------------------------|--------------------------------------------------|------------------------------------------------|------------------------------------------------|
| All cancers                                                             | 89 (58.9)                                        | 23 (48.9)                                      | 24 (63.2)                                      |
| Breast                                                                  | 22 (14.6)                                        | 9 (19.1)                                       | 5 (13.2)                                       |
| Prostate                                                                | 9 (6.0)                                          | 5 (10.6)                                       | 2 (5.3)                                        |
| Lung or mesothelioma                                                    | 5 (3.3)                                          | 2 (4.3)                                        | 2 (5.2)                                        |
| Bladder or renal                                                        | 5 (3.3)                                          | 3 (6.4)                                        | 1 (2.6)                                        |
| Liver and/or pancreas                                                   | 3 (2.0)                                          | 3 (6.4)                                        | 0 (0.0)                                        |
| Haematological                                                          | 3 (2.0)                                          | 0 (0.0)                                        | 1 (2.6)                                        |
| Retinoblastoma, eye, or childhood cancers                               | 3 (2.0)                                          | 0 (0.0)                                        | 1 (2.6)                                        |
| Colorectal                                                              | 2 (1.3)                                          | 0 (0.0)                                        | 0 (0.0)                                        |
| Melanoma                                                                | 2 (1.3)                                          | 1 (2.1)                                        | 0 (0.0)                                        |
| Multiple cancers (breast and ovarian, breast, prostate, and colorectal) | 2(1.3)                                           | 0 (0.0)                                        | 0 (0.0)                                        |
| Head and neck or oral                                                   | 2 (1.3)                                          | 1 (2.1)                                        | 1 (2.6)                                        |
| Others (testicular, ovarian, soft tissue sarcoma, carcinoid)            | 4 (2.6)                                          | 0 (0.0)                                        | 1 (2.6)                                        |
| <b>Type of Developer</b>                                                | <b>N (%)</b>                                     | <b>N (%)</b>                                   | <b>N (%)</b>                                   |
| Commercial or private organisation                                      | 65 (43.0)                                        | 23 (48.9)                                      | 20 (52.6)                                      |
| Charity or non-profit organisation                                      | 30 (19.9)                                        | 12 (25.5)                                      | 1 (2.6)                                        |
| Unclear                                                                 | 16 (10.6)                                        | 2 (4.3)                                        | 11 (28.9)                                      |
| Healthcare organisation                                                 | 15 (9.9)                                         | 7 (14.9)                                       | 3 (7.9)                                        |
| Academic organisation                                                   | 8 (5.3)                                          | 2 (4.3)                                        | 2 (5.3)                                        |
| Clinical or research societies/networks or government                   | 4 (2.7)                                          | 0 (0.0)                                        | 0 (0.0)                                        |
| Partnership of various types of organisation                            | 13 (8.6)                                         | 1 (2.1)                                        | 1 (2.6)                                        |
| <b>Country of Origin</b>                                                | <b>N (%)</b>                                     | <b>N (%)</b>                                   | <b>N (%)</b>                                   |
| USA                                                                     | 68 (45.0)                                        | 25 (53.2)                                      | 5 (13.2)                                       |
| Unclear                                                                 | 31 (20.5)                                        | 7 (14.9)                                       | 17 (44.8)                                      |
| UK, Ireland, or Gibraltar                                               | 15 (9.9)                                         | 8 (17.0)                                       | 1 (2.6)                                        |
| Multinational                                                           | 7 (4.6)                                          | 2 (4.3)                                        | 1 (2.6)                                        |
| India                                                                   | 7 (4.6)                                          | 0 (0.0)                                        | 5 (13.2)                                       |
| Canada                                                                  | 5 (3.3)                                          | 0 (0.0)                                        | 2 (5.3)                                        |
| Malaysia or Singapore                                                   | 5 (3.3)                                          | 1 (2.1)                                        | 3 (7.9)                                        |
| Australia                                                               | 4 (2.6)                                          | 2 (4.3)                                        | 0 (0.0)                                        |
| The Netherlands                                                         | 3 (2.0)                                          | 1 (2.1)                                        | 1 (2.6)                                        |
| Others (France, Germany, Hungary, Morocco, Pacific Islands, Spain)      | 6 (4.0)                                          | 1 (2.1)                                        | 3 (7.9)                                        |
| <b>Number of Downloads (Google Play data only for 104 apps)</b>         | <b>N (%)</b>                                     |                                                | <b>N (%)</b>                                   |
| <100                                                                    | 45 (43.3)                                        |                                                | 17 (44.7)                                      |
| 100-500                                                                 | 24 (23.1)                                        |                                                | 10 (26.3)                                      |
| 500-1000                                                                | 9 (8.7)                                          |                                                | 4 (10.5)                                       |
| 1000-5000                                                               | 17 (16.3)                                        |                                                | 4 (10.5)                                       |
| 5000-10,000                                                             | 3 (2.9)                                          |                                                | 1 (2.6)                                        |
| 10,000-50,000                                                           | 5 (4.9)                                          |                                                | 2 (5.3)                                        |
| >50,000                                                                 | 1 (0.9)                                          |                                                | 0 (0.0)                                        |
| <b>Price to download (£ Sterling)</b>                                   | <b>N (%)</b>                                     | <b>N (%)</b>                                   | <b>N (%)</b>                                   |
| Free                                                                    | 140 (92.7)                                       | 46 (97.9)                                      | 34 (89.5)                                      |
| <£9.49 Google Play/ <£12.99 App store                                   | 9 (6.0)                                          | 1 (2.1)                                        | 2 (5.3)                                        |
| >£12.99                                                                 | 2 (1.3)                                          | 0                                              | 2 (5.3)                                        |

1  
2  
3 Unlike Apple's App store, Google Play provides statistics for the number of app downloads.  
4  
5 Of the 104 apps available on Google Play, 45 apps (43.3%) had been downloaded less than  
6  
7 100 times. Five apps ( *Cancer.net mobile*, *MD Anderson mobile*, *Cancer fighting food*,  
8  
9 *Cancer Curing foods*, and *My Cancer Coach*) had between 10,000 and 50,000 downloads.  
10  
11 One app, *Belong Life*, had over 50,000 downloads. *Belong Life* markets itself as an  
12  
13 "information sharing platform", featuring an on-line social network of individuals with  
14  
15 cancer, healthcare professionals who answer questions, access to personalised information,  
16  
17 and a clinical trial matching service.  
18  
19  
20  
21  
22

### 23 **Themes within on-line descriptions of the apps**

24  
25 Verbatim app descriptions and text from screenshots ran to over 30,000 words. Three  
26  
27 prominent themes were: Fighting for Life, Navigating a Journey, and Being Empowered to  
28  
29 Take Control. Examples of app descriptions fitting these themes, with quotations, are  
30  
31 included in Table 2. Fighting metaphors were observed within a range of apps and were  
32  
33 sometimes contained within the app title (e.g. *Attack Cancer using Hypnosis & Guided*  
34  
35 *Imagery/Meditation*, *Cancer Defeated*, and *Cancer Fighting Foods*). In fighting metaphors,  
36  
37 cancer was depicted as an enemy invader and surviving cancer as a battle. Metaphors about  
38  
39 fighting and battles were prominent in apps promoting healthy eating or specific "cancer-  
40  
41 fighting" foods or diets.  
42  
43  
44  
45

46  
47 Cancer was often compared to a journey and apps marketed themselves as tools to help  
48  
49 navigate that journey. Apps that incorporated social networking often emphasised that the  
50  
51 cancer journey did not have to be navigated alone. Social networking was suggested as a  
52  
53 source of knowledge and emotional support. Many apps promoted peer comparison, and  
54  
55 emphasised that others around the world were facing very similar problems, with some apps  
56  
57 referring to "others like you". There was a sense within language used that cancer was  
58  
59 associated with loss of control, and that downloading and interacting with an app was a  
60

method of empowerment and taking back control. Apps were marketed to individuals as a method of becoming actively involved in self-management.

Table 2: Themes present within app marketing statements with example quotations

| Theme                           | Example app (name in <i>Italics</i> ) with quotations from on-line app store                                                                                                                                                                                                                                                                                                                             |
|---------------------------------|----------------------------------------------------------------------------------------------------------------------------------------------------------------------------------------------------------------------------------------------------------------------------------------------------------------------------------------------------------------------------------------------------------|
| Fighting for life               | <p><i>Twist out cancer</i> : “[get to] know other cancer survivors who fought with odds and kicked cancer in the butt!”</p> <p>“<i>Whip cancer</i> provides people with the power to instantly and accurately picture the cancer cells they want to expel from their bodies... <i>Whip Cancer</i> is a powerful tool to help you become relaxed and thus feel empowered while battling your cancer.”</p> |
| Navigating a journey            | <p><i>Breast Cancer healthline</i>: “You’re not on this journey alone. Are you facing a diagnosis? Already in treatment? Remission? We’ll connect you with people just like you, at the same stage in the journey”.</p> <p>“The <i>BigC-Connect</i> platform has been designed to help survivors of cancer on their journey to survival.”</p>                                                            |
| Being empowered to take control | <p>“Hearing that you have been diagnosed with breast cancer can turn your world upside down. The <i>OWise breast cancer</i> app can help you regain control during the chaotic times of illness and treatments”</p> <p>“<i>Blood Cancer Storylines</i> is filled with great tools to help you take control of your health.”</p>                                                                          |

### Content analysis

The apps offered content that could be summarised under five main categories: (1) Imparting Information about Cancer; (2) Planning and Organising Cancer Care; (3) Interacting with Others (including others affected by cancer, and healthcare professionals); (4) Enacting Management Strategies, and Adjusting to Life With or Beyond Cancer; and (5) Getting Feedback about Cancer Management. The specific app features that support each of these activities are summarised in Table 3 and discussed below.



**Table 3: Advertised app functions that support cancer survivorship activities**

| Survivorship activity                               | App feature                                                                                                                                                                                        | Number (%) apps which advertised this feature |
|-----------------------------------------------------|----------------------------------------------------------------------------------------------------------------------------------------------------------------------------------------------------|-----------------------------------------------|
| <b>Imparting information about cancer</b>           | Delivers information about the nature of cancer, cancer terminology, treatment approaches, and services. Apps present information as text, news feeds/updates, videos, and question/answer formats | 81 (53.6%)                                    |
|                                                     | Gives dietary and/or exercise advice, targeting individuals living with and beyond cancer                                                                                                          | 15 (9.9%)                                     |
| <b>Planning and organising cancer care</b>          | Upload and store personal records e.g. diaries/journals, results                                                                                                                                   | 25 (16.6%)                                    |
|                                                     | Keep a list of medications +/- their scheduling                                                                                                                                                    | 20 (13.3%)                                    |
|                                                     | Share uploaded personal records with others                                                                                                                                                        | 8 (5.3%)                                      |
|                                                     | Keep a calendar of appointments                                                                                                                                                                    | 12 (8.0%)                                     |
|                                                     | Login to view or change clinical appointments                                                                                                                                                      | 4 (2.7%)                                      |
|                                                     | Login to remotely access clinical records or results                                                                                                                                               | 3 (2.0%)                                      |
|                                                     | Create or view survivorship care plan                                                                                                                                                              | 2 (1.3%)                                      |
|                                                     | Lists available clinical trials                                                                                                                                                                    | 9 (6.0%)                                      |
| <b>Interacting with others</b>                      | Clinical trials matching                                                                                                                                                                           | 1 (0.7%)                                      |
|                                                     | Access to an on-line cancer community or social network (Four offered a matching service)                                                                                                          | 25 (16.6%)                                    |
|                                                     | List of local (geographically limited) sources of peer support                                                                                                                                     | 11 (7.3%)                                     |
|                                                     | Message a linked healthcare professional                                                                                                                                                           | 4 (2.7%)                                      |
| <b>Enacting management strategies and adjusting</b> | Ask a professional within an online community                                                                                                                                                      | 3 (2.0%)                                      |
|                                                     | Track and record specific symptoms or physiological parameters                                                                                                                                     | 29 (19.2%)                                    |
|                                                     | Provides symptom management tips and advice                                                                                                                                                        | 5 (3.3%)                                      |
|                                                     | Set alarms as reminders to take medication                                                                                                                                                         | 14 (9.3%)                                     |
|                                                     | Track fitness or diet (four apps offered integration with wearable fitness trackers)                                                                                                               | 5 (3.2%)                                      |
|                                                     | Delivers instructions on complementary and/or alternative therapies                                                                                                                                | 12 (7.9%)                                     |
| <b>Getting feedback about cancer management</b>     | Delivers psychological therapies                                                                                                                                                                   | 3 (2.0%)                                      |
|                                                     | Offers spiritual support e.g. bible verses, prayers                                                                                                                                                | 2 (1.4%)                                      |
|                                                     | Generates graphical summaries of self-monitoring data for personal reflection and sharing with others (particularly clinicians)                                                                    | 21 (13.9%)                                    |
|                                                     | Generates or supports creation of question prompt lists (intended to be used during medical encounters)                                                                                            | 13 (8.6%)                                     |
|                                                     | Allows video or audio-recording of medical consultations                                                                                                                                           | 4 (2.7%)                                      |

### Imparting Information about Cancer

Over half the apps (n=81, 53.6%) stated in their description that they provided information or educational materials about cancer; for example, the nature of cancer, aspects of terminology related to cancer, and cancer treatments. The apps presented this in various ways, including

1  
2  
3 fact-sheets/written information, news feeds and updates, questions and answers, and videos.  
4  
5 Some apps (e.g. *Breast Cancer Ally*) provided personalised information based on user-  
6  
7 reported characteristics, including treatments received or disease subtype. One app,  
8  
9 *Personalized Sarcoma Care*, offered prognostic information to users with high-grade soft  
10  
11 tissue sarcoma of the limb who were going to be treated with surgery and radiotherapy. The  
12  
13 app offered a disclaimer that it was not a medical device, not meant to be used to inform  
14  
15 clinical decisions, and not tested for clinical usefulness. Users were instructed to discuss  
16  
17 prognostic results with their physician.  
18  
19  
20  
21

### 22 Planning and Organising Cancer Care

23  
24  
25 Twenty-five apps (16.6%) allowed users to enter and store records relating to their cancer  
26  
27 care, such as results or diaries of treatments they had received. Apps also allowed users to  
28  
29 keep a calendar of appointments (n=12, 8.0%) and to keep lists and scheduling of  
30  
31 medications (n=20, 13.3%). Three apps (*MD Andersen Mobile*, *MyMSK*, and *NED*) allowed  
32  
33 registered users linked to the specific cancer centre to log in and view some of their own  
34  
35 results. Four apps (*MD Andersen Mobile*, *MyMSK*, *CanHOPE cancer support* and  
36  
37 *Pratheeksha*) allowed registered patients to view or change appointments.  
38  
39  
40

41  
42 Nine apps listed cancer clinical trials that may be relevant to individuals living with cancer,  
43  
44 and one (*Belong Life*) offered a clinical trials matching service based on parameters entered  
45  
46 by the user. Two apps supported survivorship care plans (SCPs). *My Care Plan* suggested  
47  
48 that users should input data to create their own SCP, and then complete it with their  
49  
50 oncologist. The *Survivor Care* app allowed registered patients with testicular cancer to use  
51  
52 the app to read a QR code (quick response code, or matrix bar code), generated by their  
53  
54 specialist, that gave them access to a personalised care plan.  
55  
56  
57  
58  
59  
60

### Interacting with Others

Twenty five apps (16.6%) offered access to an on-line community (social network) of other individuals with cancer, promoting these networks as sources of support and information.

Four of these (*Boobytrapp*, *Breast Cancer Health*, *Breast Cancer Social*, and *Cnected*) advertised a matching service in which users could be matched with other users or groups based on characteristics such as cancer type, stage, treatments, and interests.

Apps also offered interaction with healthcare professionals: three apps (*Belong.life*, *Breast Friends app*, and *Cancer Connect*) listed the ability to message or ask questions of professionals who were linked to the app platform. Four apps (Medocity's *iCancer Health*, *MD Andersen Mobile*, *MyMSK*, and *Pratheeksha*) allowed users to login and send messages to their linked care team.

### Enacting Management Strategies, and Adjusting to Life With or Beyond Cancer

Specific aspects of self-management supported by apps include symptom tracking and monitoring; setting alarms or reminders to take medications regularly, tracking and adjusting diet and physical activity levels, utilising psychological and complementary approaches, and knowing when to seek medical attention for chemotherapy side effects.

Twenty-nine apps (19.2%) allowed users to track their symptoms: mainly fatigue, pain, mood changes, nausea, and sleep problems. Some suggested monitoring physical or physiological parameters, including pulse, blood pressure, and weight, and some allowed customisation, letting the user decide which symptoms/parameters to monitor. The recommended frequency of self-monitoring varied, with some promoting weekly input, some apps suggesting on-demand tracking when symptoms were experienced, and others not specifying particular intervals for self-monitoring. Apps utilised a number of rating scales, including touch-screen

1  
2  
3 sliders, and faces rating scales. The data were used to provide graphs and output reports (see  
4  
5 “feedback” below).  
6  
7

8 Fifteen apps (9.9%) gave advice about diet and/or exercise after a cancer diagnosis, with five  
9  
10 allowing users to track their exercise or dietary activities. Four apps offered integration with  
11  
12 wearable fitness trackers.  
13  
14

15  
16 Complementary and alternative therapies were a prominent component of 12 apps (7.9%),  
17  
18 which gave instructions on relaxation techniques, provided “healing” music playlists, and  
19  
20 taught guided imagery, visualisation, meditation, Qigong, and yoga. The *MeTime* app,  
21  
22 developed by University of Michigan, taught acupressure to manage fatigue in breast cancer  
23  
24 survivors, and quoted evidence supporting its use from a randomised controlled trial (29).  
25  
26

27 Three apps (*Emory Awake*, *UNTIRE*, and *Bubble VR*) delivered programmes of psychological  
28  
29 therapy to cancer survivors; for example, *Bubble VR* delivered cognitive behavioural therapy  
30  
31 (CBT), guided imagery, meditation, and mindfulness-based stress reduction (MBSR) within  
32  
33 Virtual Reality. The app was linked to a focus group research study, and registered  
34  
35 participants could use a PIN code to interact with it.  
36  
37  
38

39 Three apps (*CanAdvice+*, *Cancer Emergency Response Tool*, and *For Cancer Care*)  
40  
41 specifically targeted people on chemotherapy, and sought to help users judge when to seek  
42  
43 medical attention for side effects or problems experienced during chemotherapy. *CanAdvice+*  
44  
45 and *Cancer Emergency Response Tool* were linked to UK cancer centres and utilised the  
46  
47 United Kingdom Oncology Nurses Society (UKONS) triage tool (30), whereas *For Cancer*  
48  
49 *Care* offered generic tips and advice to manage chemotherapy side effects.  
50  
51  
52

53  
54 Some apps dealt with changes in body image after cancer, and psychological adjustment to  
55  
56 physical changes. *Inkspiration* app allowed users to “try on” mastectomy tattoos, super-  
57  
58  
59  
60

1  
2  
3 imposing tattoos onto photo uploads. *BECCA – the Breast Cancer Care app* offered beauty  
4 tips alongside other information about breast cancer.  
5  
6  
7

### 8 9 **Getting Feedback about Cancer Management**

10  
11 Twenty one apps (13.9%) allowed users who had tracked symptoms to generate graphical  
12 summaries of their self-monitoring data for personal reflection (usually line graphs showing,  
13 for example, pain levels plotted against date/time), and to generate output reports from the  
14 data, usually by email. A central premise was that users would learn about patterns within  
15 their symptoms, and that sending their symptom reports to professionals could result in action  
16 by the professional to help with symptom management.  
17  
18  
19  
20  
21  
22  
23

24  
25 Apps also attempted to influence clinical encounters between users and their clinicians by  
26 allowing them to generate (sometimes from templates or lists) or store questions that they  
27 would like to ask at the next medical encounter (n=13, 8.6%). Four apps (*Focus on*  
28 *Lymphoma*, *My Cancer Coach*, *OWise Breast Cancer*, and *Pocket Cancer Care Guide –*  
29 *National Coalition for Cancer Survivorship*) allowed users to video- or audio-record their  
30 medical consultations.  
31  
32  
33  
34  
35  
36  
37  
38  
39

### 40 41 **Clinical and/or Scientific Basis for App Content and Apps as Commercial** 42 **Opportunities**

43  
44 Fifty one out of 151 apps (33.8%) cited clinical or scientific/clinical research team input into  
45 the development of the app within the online description. Most of these apps were developed  
46 by recognisable institutions, such as universities, clinics, or charities. However, one app,  
47 *Don't Die 2* retailing at £299.99 on Google Play, had limited information about content, and  
48 stated: "Contains new cancer approach not previously available to cancer victims. All results  
49 obtained after a rigorous 12-year study and when applied to active cancer patients show  
50 dramatic results increasing survival results." The app was developed by a family cancer  
51  
52  
53  
54  
55  
56  
57  
58  
59  
60

1  
2  
3 foundation (MiSong Foundation), and screenshots showed an enquiry form which users could  
4 fill in for further information. Links to the developer website were inactive.  
5  
6  
7

8 We found a number of apps offering purchasable products to cancer survivors and apps that  
9 made claims about offering a potential cancer cure. *Best Prostate Cancer Treatment* opened  
10 its description by stating: “Court Documented Proof That The Cure For Prostate Cancer &  
11 Colon Cancer is real”. Screenshots from the app were captioned with “PROSTATE  
12  
13 CANCER Cure for Cancer Now Available”, and the app offered treatments based on whole-  
14 leaf Aloe Vera. One screenshot showed an “Advanced Package” with products available for  
15 \$750. The app description marketed the product as follows: “The advanced package provides  
16 specific elements to expedite the healing process. This package revitalizes and engages  
17 intercellular advancement and ease in detoxification”. *Cancel Cancer* mentioned links  
18 between body acidity and cancer, and screenshots from the app showed order forms, products  
19 for sale, and videos about Kangen water, an alkaline water.  
20  
21  
22  
23  
24  
25  
26  
27  
28  
29  
30  
31  
32  
33

34 Three apps contained the word “cure” in their title. *Cancer Cure* (retailing on Google for  
35 £28.99) offered “300 alternate healing ideas” and was recommended for “anyone who is  
36 struggling for cancer survival”. *Cancer Curing Foods* (free to download) had been  
37 downloaded more than 10,000 times on Google Play and offered “top ten fruits, vegetables,  
38 and foods that can cure cancer”. *Various Cancer Cures*, offered free via Google Play, listed  
39 information about surgery, chemotherapy, and radiotherapy as treatment options for cancer.  
40  
41  
42  
43  
44  
45  
46  
47  
48

49 *Cancer Wellness* invited users to complete a weekly cancer survey, with links to a private  
50 clinic in the Pacific Islands (<http://cancerwellnessclinic.com/our-treatment-program/>) that  
51 offered alternative cancer treatments and supplements. In *Ways to Fight Off Cancer*, available  
52 on Google Play, the on-line description had statements that included “broccoli cures cancer”  
53 and “tomato cures cancer”... “So What Are you Waiting For !?! Download the "Ways Fight  
54  
55  
56  
57  
58  
59  
60

1  
2  
3 Off Cancer" Now!" Other potentially exaggerated claims were found in apps promoting  
4  
5 complementary therapies and visualisation; for example *Cancer Fighting App* stated (sic.)  
6  
7 "After working on visualization for few weeks, the cancer tumor had shrunk to small its size  
8  
9 and its continuous become smaller and smaller. Imagination and visualization for creating  
10  
11 radiant, lifelong health and happiness."  
12  
13

## 14 15 16 **Discussion**

### 17 18 Main findings

19  
20 We reviewed 151 apps targeting individuals living with and or beyond cancer, available for  
21  
22 download via on-line stores. The apps are often marketed in terms of fighting cancer, taking a  
23  
24 journey, and taking control. Apps are heterogeneous in terms of aims and scope, but typical  
25  
26 content includes informational resources, diary functions, access to on-line social  
27  
28 networks/communities, and symptom-tracking capabilities linked to graphical outputs.  
29  
30

31  
32 App owners came from a range of backgrounds (e.g. non-profit organisations, academic  
33  
34 institutions, healthcare providers), but most publicly available apps had been developed by  
35  
36 commercial or private organisations. We were unable to discern the nature of the developer in  
37  
38 16 apps, despite visiting linked websites. We also found some apps that seemed to make  
39  
40 exaggerated claims, for example, about foods that cure cancer, visualisation regimes that  
41  
42 shrink tumours (see examples above), and apps that marketed or sold products with  
43  
44 questionable efficacy (e.g. Kangen water or Aloe Vera extract).  
45  
46  
47  
48  
49

### 50 Comparison with existing literature, and implications for practice, policy, and research

51  
52 Violence and journey metaphors are known to be widely used in the context of cancer and  
53  
54 cancer fundraising campaigns, and have sparked debate.<sup>(31)</sup> Both violence and journey  
55  
56 metaphors can be perceived in both positive, and in disempowering ways. We found these  
57  
58 metaphors to be prominent in on-line app marketing.  
59  
60

1  
2  
3 Apps cover some of the areas that are recommended in clinical guidelines for cancer  
4 survivorship care (32), such as information provision; making lifestyle changes (particularly  
5 diet and exercise), dealing with physical and psychosocial effects of cancer and its treatment,  
6 and providing survivorship care plans. The potential usefulness of reputable apps may be  
7 undermined by the fact that they appear in stores alongside those that are potentially  
8 exploitative.  
9

10  
11 Guidelines and regulatory procedures for health apps have been introduced in the UK (33,34)  
12 and the USA (35), but these mainly apply to apps classed as medical devices (used to  
13 diagnose, support diagnosis or clinical decision making, or make calculations to determine  
14 diagnosis or treatment), which are considered to carry the highest risks. Apps that provide  
15 education, monitor health or well-being, and store or transmit data without change are not  
16 subject to the same regulatory procedures.(34) These types of apps can be developed quickly  
17 by anyone who wishes to (36), without specific regulatory requirements.  
18  
19

20  
21 There is increasing recognition that lack of public trust is a major barrier to the successful  
22 utilisation of data and technology to improve patient outcomes.(37) In a recent review, Wyatt  
23 discussed problems with health apps, including privacy issues, poor quality content, and  
24 variable accuracy, for example, in diagnosing melanoma (38). In our review, most apps were  
25 free, and it was beyond the scope of this review to determine how apps attracted revenue.  
26 Potential sources include advertising, in-app purchases, and data “harvesting”. There is  
27 increasing evidence that sharing of user data is routine in medical apps (39) and that data  
28 harvesting for targeted advertising is an important source of revenue for many app  
29 developers.(38)  
30  
31

32  
33 Questions remain about the clinical role of cancer apps, how they affect formal medical care  
34 and influence clinical outcomes. Some of the apps we reviewed helped users to generate lists  
35  
36  
37  
38  
39  
40  
41  
42  
43  
44  
45  
46  
47  
48  
49  
50  
51  
52  
53  
54  
55  
56  
57  
58  
59  
60



1  
2  
3 of questions that could be taken to appointments or facilitated video or audio-recording of  
4 consultations. Formal trials of this type of approach have shown promise in the oncology  
5 setting, with respect to improving patients' information needs, their satisfaction with patient-  
6 professional communication, and recall of information (40–42). Whether these findings can be  
7 extrapolated to specific apps is unclear.  
8  
9

10  
11  
12  
13  
14  
15 Many of the apps we reviewed attempted to influence medical care by suggesting that self-  
16 monitoring reports be shared with clinicians. Patient reported outcome monitoring has been  
17 shown to improve patient satisfaction with care in the oncology setting, and to increase the  
18 number of patient outcomes that are discussed during consultations.(26,27). However, any  
19 effects are likely to be contingent on how the data are used during clinical encounters and  
20 what data are collected.(43) Scientific trials tend to use validated questionnaires, as opposed  
21 to the, often generic, tools present within apps.  
22  
23  
24  
25  
26  
27  
28  
29  
30  
31

32 There seems to be a widely held assumption in symptom management apps that providing  
33 patients with simple graphical summaries of their self-reported symptom data will afford  
34 insights that could improve symptom management. Conversely, there is a danger that apps  
35 could increase the work and burden of cancer survivorship activities without resultant  
36 benefits to the user. We noted close parallels between categories of app content (Table 3),  
37 and models of treatment burden in other chronic conditions.(29–31).  
38  
39  
40  
41  
42  
43  
44  
45

46 The app market is a potentially challenging environment for patients and clinicians to  
47 navigate in terms of judging app quality, effectiveness, clinical utility, and data privacy. It  
48 may be that app stores themselves should be asked to take more responsibility for the content  
49 of the apps they offer. Several high-profile scandals, for example, Cambridge Analytica  
50 allegedly using Facebook data to influence election results,(44) and suicides potentially  
51 linked to social media use(45), have led to increased public scrutiny surrounding the social  
52  
53  
54  
55  
56  
57  
58  
59  
60

responsibilities of technology providers. With respect to app stores, existing legislation, such as trading standards regulations that prevent false or misleading advertising, and General Data Protection Regulation (GDPR) might be enforced to protect consumers. The NHS has also started a library of approved apps that have been screened against quality criteria (46). Three of the apps reviewed here, *BECCA – the Breast Cancer Care app*, *OWISE breast cancer*, and *Untire: Beating cancer fatigue*, appear in the library.

While app stores continue to offer low quality and potentially exploitative apps, we propose a rudimentary check-list (Text box one), the “Four D’s”, which might be used by patients before downloading a health app. The checklist was derived pragmatically, based on our experiences of conducting this review, and on the existing literature/guidelines discussed above (33,35,38,39).

**Text Box one: Four D’s to discuss with patients if they are considering using a health app**

**Does something useful** – does it solve a problem you are having?

**Design** – are there screenshots that summarise the content and give you an impression of how you would use the app?

**Developer** – do you recognise a credible organisation/source behind the app, and do links to the developer website work?

**Data** – does the app ask you for personal information that you would prefer not to be shared with others or provide safeguards to keep your information private?

Intuitively, we considered a fifth “D” – Downloads, in which the number of downloads and positive/detailed consumer reviews might serve as an indicator of quality and trustworthiness. Apps by reputable organisations tended to be highly downloaded, but we also found highly

1  
2  
3 downloaded apps which seemed to be of low quality e.g. *Cancer Curing Foods*, offering “top  
4 ten fruits, vegetables, and foods that can cure cancer” had been downloaded over 10,000  
5 times. We also considered that some app reviews could be false or purposefully misleading.  
6  
7  
8 The association between number of downloads and objective measures of quality deserve  
9 further attention.  
10  
11  
12  
13

### 14 15 Strengths and limitations

16  
17  
18 The app market is changing rapidly – more apps are being added to app stores every day, and  
19 it is also possible for developers to delete apps from on-line stores. We have presented a  
20 snapshot of what was available between September 2018 and May 2019. The main limitation  
21 of this review is that we did not download and interact with individual apps. To have done so  
22 would have added considerable time to the review process (which was time-sensitive, given  
23 the changing nature of the market), and would have also involved buying several apps that  
24 looked to have limited content (e.g. “Don’t die 2” retailed at £299.99). Our content analysis is  
25 based on what was stated in online descriptions, and may underestimate content contained  
26 within the apps. We did not register a review protocol, which is a relatively new requirement  
27 in updated PRISMA guidelines for scoping reviews, which were published after we started  
28 this review (47).  
29  
30  
31  
32  
33  
34  
35  
36  
37  
38  
39  
40  
41  
42  
43

44 App stores are commercial entities and are not searchable in the same way as databases of  
45 published medical literature. We fully expect that other relevant apps exist which have not  
46 been identified by our searches. Furthermore, it is not possible to save or export searches.  
47  
48 Apps are displayed in an order that is determined by on-line stores, and, to the best of our  
49 knowledge, the exact sort algorithms utilised by stores are not in the public domain. This  
50 makes searches difficult to accurately reproduce, and made it difficult to involve two authors  
51 in all stages of the app selection process. Nevertheless, where possible, we have adopted  
52  
53  
54  
55  
56  
57  
58  
59  
60

1  
2  
3 principles of systematic reviewing. We are confident that we have identified apps in a  
4  
5 systematic and unbiased way and have characterised a large spectrum of currently available  
6  
7 apps.  
8  
9

## 10 **Conclusions**

11  
12 Apps exist that cover a large spectrum of cancer survivorship activities: key components are  
13  
14 information provision, storing personal summaries, and self-monitoring. The effects of such  
15  
16 apps on clinical consultations, patient work/burden, and clinical outcomes merit further  
17  
18 attention. Most apps are developed by commercial organisations and promises of  
19  
20 empowerment in the “fight” against cancer are tempered by the potential for exaggerated  
21  
22 claims and exploitation.  
23  
24  
25  
26  
27  
28  
29  
30

31 **Funding:** This work was supported by NHS Grampian Pump Priming funding, grant  
32  
33 reference RG14437-11. DP is supported by the strategic research programme funded by the  
34  
35 Scottish Government’s Rural and Environment Science and Analytical Services Division  
36  
37

38 **Competing Interests:** RA and PM are involved in researching, designing, and developing  
39  
40 apps for people with cancer but have no associations with commercial entities. None of our  
41  
42 apps are available via online stores, or represented within this review. There are no other  
43  
44 competing interests of conflicts to declare.  
45  
46  
47

48 **Contributions:** RA conceptualized this review, designed the review, undertook searches,  
49  
50 assessed the apps for inclusion/exclusion, undertook data extraction, and wrote the paper.  
51  
52

53 DM undertook scoping searches, helped refine the search criteria, checked the final apps  
54  
55 fulfilled inclusion/exclusion criteria, and performed independent dual data extraction and  
56  
57 content coding. He contributed to drafts of the paper, and revising the article critically.  
58  
59  
60

1  
2  
3 DP assisted with thematic analysis, and revising the article critically.  
4  
5

6 PM contributed to drafts of the paper and revising the article critically.  
7  
8

9  
10 **Figure 1: Identification and screening process for apps included in this review**

11  
12 **Data sharing statement**

13  
14 All data relevant to the study are included in the article or uploaded as supplementary  
15  
16 information.  
17  
18  
19  
20  
21  
22  
23  
24  
25  
26  
27  
28  
29  
30  
31  
32  
33  
34  
35  
36  
37  
38  
39  
40  
41  
42  
43  
44  
45  
46  
47  
48  
49  
50  
51  
52  
53  
54  
55  
56  
57  
58  
59  
60

For peer review only

## References

1. National Cancer Institute. Cancer Statistics - National Cancer Institute [Internet]. [cited 2019 Feb 1]. Available from: <https://www.cancer.gov/about-cancer/understanding/statistics>
2. Maddams J, Utley M, Møller H. Projections of cancer prevalence in the United Kingdom, 2010–2040. *Br J Cancer* [Internet]. 2012 Sep 14 [cited 2018 Mar 5];107(7):1195–202. Available from: <http://www.ncbi.nlm.nih.gov/pubmed/22892390>
3. Adam R, Watson E. The role of primary care in supporting patients living with and beyond cancer. *Curr Opin Support Palliat Care* [Internet]. 2018 Jul [cited 2019 Mar 15];12(3):1. Available from: <http://www.ncbi.nlm.nih.gov/pubmed/30074923>
4. Glare PA, Davies PS, Finlay E, Gulati A, Lemanne D, Moryl N, et al. Pain in cancer survivors. *J Clin Oncol* [Internet]. 2014 Jun 1 [cited 2018 Mar 1];32(16):1739–47. Available from: <http://www.ncbi.nlm.nih.gov/pubmed/24799477>
5. Hoekstra RA, Heins MJ, Korevaar JC. Health care needs of cancer survivors in general practice: a systematic review. *BMC Fam Pract* [Internet]. 2014 Dec 13 [cited 2018 Sep 17];15(1):94. Available from: <http://www.ncbi.nlm.nih.gov/pubmed/24885266>
6. Elliott J, Fallows A, Staetsky L, Smith PWF, Foster CL, Maher EJ, et al. The health and well-being of cancer survivors in the UK: findings from a population-based survey. *Br J Cancer* [Internet]. 2011 Nov 8 [cited 2019 Mar 4];105 Suppl 1(Suppl 1):S11-20. Available from: <http://www.ncbi.nlm.nih.gov/pubmed/22048028>
7. Nekhlyudov L, O'malley DM, Hudson S V. Integrating primary care providers in the care of cancer survivors: gaps in evidence and future opportunities. *Lancet Oncol* [Internet]. 2017 Jan 1 [cited 2018 Apr 23];18(1):e30–8. Available from: <http://www.ncbi.nlm.nih.gov/pubmed/28049575>
8. Escriva Bouley G, Leroy T, Bernetière C, Paquenseguy F, Desfriches-Doria O, Préau M. Digital health interventions to help living with cancer: A systematic review of participants' engagement and psychosocial effects. *Psychooncology* [Internet]. 2018 Dec [cited 2019 Mar 4];27(12):2677–86. Available from: <http://www.ncbi.nlm.nih.gov/pubmed/30152074>
9. Groen WG, Kuijpers W, Oldenburg HS, Wouters MW, Aaronson NK, van Harten WH. Empowerment of Cancer Survivors Through Information Technology: An Integrative Review. *J Med Internet Res* [Internet]. 2015 Nov 27 [cited 2019 Mar 4];17(11):e270. Available from: <http://www.ncbi.nlm.nih.gov/pubmed/26614438>
10. Business of Apps. App Download and Usage Statistics (2018) - Business of Apps [Internet]. 2018 [cited 2019 Feb 14]. Available from: <http://www.businessofapps.com/data/app-statistics/>
11. Burki TK. Cancer apps. *Lancet Oncol* [Internet]. 2013 Jun [cited 2019 Mar 4];14(7):580–1. Available from: <https://linkinghub.elsevier.com/retrieve/pii/S1470204513702596>
12. IQVIA Institute for Human Data Science. The Growing Value of Digital Health - IQVIA [Internet]. [cited 2019 Aug 19]. Available from: <https://www.iqvia.com/institute/reports/the-growing-value-of-digital-health>

- 1  
2  
3 13. The Rise of mHealth Apps: A Market Snapshot - Liquid State [Internet]. 2018 [cited  
4 2019 May 29]. Available from: <https://liquid-state.com/mhealth-apps-market-snapshot/>  
5
- 6 14. Cox A, Lucas G, Marcu A, Piano M, Grosvenor W, Mold F, et al. Cancer Survivors'  
7 Experience With Telehealth: A Systematic Review and Thematic Synthesis. *J Med*  
8 *Internet Res* [Internet]. 2017 Jan 9 [cited 2019 Mar 11];19(1):e11. Available from:  
9 <http://www.jmir.org/2017/1/e11/>  
10
- 11 15. Dickinson R, Hall S, Sinclair JE, Bond C, Murchie P. Using technology to deliver  
12 cancer follow-up: a systematic review. *BMC Cancer* [Internet]. 2014 May 3 [cited  
13 2019 Mar 11];14(1):311. Available from:  
14 <http://bmccancer.biomedcentral.com/articles/10.1186/1471-2407-14-311>  
15
- 16 16. Abrams LC, Lee Westmaas J, Bontemps-Jones J, Ramani R, Mellerson J. A content  
17 analysis of popular smartphone apps for smoking cessation. *Am J Prev Med* [Internet].  
18 2013 Dec [cited 2018 Sep 5];45(6):732–6. Available from:  
19 <http://linkinghub.elsevier.com/retrieve/pii/S0749379713004790>  
20
- 21 17. Schoffman DE, Turner-McGrievy G, Jones SJ, Wilcox S. Mobile apps for pediatric  
22 obesity prevention and treatment, healthy eating, and physical activity promotion: just  
23 fun and games? *Transl Behav Med* [Internet]. 2013 Sep 17 [cited 2018 Sep  
24 5];3(3):320–5. Available from: [https://academic.oup.com/tbm/article/3/3/320-](https://academic.oup.com/tbm/article/3/3/320-325/4563017)  
25 [325/4563017](https://academic.oup.com/tbm/article/3/3/320-325/4563017)  
26
- 27 18. Azar KMJ, Lesser LI, Laing BY, Stephens J, Aurora MS, Burke LE, et al. Mobile  
28 applications for weight management: theory-based content analysis. *Am J Prev Med*  
29 [Internet]. 2013 Nov [cited 2018 Sep 5];45(5):583–9. Available from:  
30 <http://linkinghub.elsevier.com/retrieve/pii/S0749379713004315>  
31
- 32 19. Bender JL, Yue RYK, To MJ, Deacken L, Jadad AR. A lot of action, but not in the  
33 right direction: systematic review and content analysis of smartphone applications for  
34 the prevention, detection, and management of cancer. *J Med Internet Res* [Internet].  
35 2013 Dec 23 [cited 2018 Apr 11];15(12):e287. Available from:  
36 <http://www.jmir.org/2013/12/e287/>  
37
- 38 20. Kassianos AP, Emery JD, Murchie P, Walter FM. Smartphone applications for  
39 melanoma detection by community, patient and generalist clinician users: a review. *Br*  
40 *J Dermatol* [Internet]. 2015 Jun [cited 2019 Mar 4];172(6):1507–18. Available from:  
41 <http://doi.wiley.com/10.1111/bjd.13665>  
42
- 43 21. Abraham C, Michie S. A taxonomy of behavior change techniques used in  
44 interventions. *Heal Psychol* [Internet]. 2008 May [cited 2019 May 29];27(3):379–87.  
45 Available from: <http://www.ncbi.nlm.nih.gov/pubmed/18624603>  
46
- 47 22. Vollmer Dahlke D, Fair K, Hong YA, Beaudoin CE, Pulczynski J, Ory MG. Apps  
48 seeking theories: results of a study on the use of health behavior change theories in  
49 cancer survivorship mobile apps. *JMIR mHealth uHealth* [Internet]. 2015 Mar 27  
50 [cited 2019 Feb 14];3(1):e31. Available from: <http://mhealth.jmir.org/2015/1/e31/>  
51
- 52 23. Levac D, Colquhoun H, O'Brien KK. Scoping studies: advancing the methodology.  
53 *Implement Sci* [Internet]. 2010 Dec 20 [cited 2019 May 29];5(1):69. Available from:  
54 <http://implementationscience.biomedcentral.com/articles/10.1186/1748-5908-5-69>  
55
- 56 24. Hsieh H-F, Shannon SE. Three Approaches to Qualitative Content Analysis. *Qual*  
57 *Health Res* [Internet]. 2005 Nov [cited 2019 Mar 22];15(9):1277–88. Available from:  
58  
59  
60

- 1  
2  
3 <http://www.ncbi.nlm.nih.gov/pubmed/16204405>  
4
- 5 25. Arksey H, O'Malley L. Scoping studies: towards a methodological framework. *Int J Soc Res Methodol* [Internet]. 2005 Feb [cited 2019 May 29];8(1):19–32. Available  
6 from: <http://www.tandfonline.com/doi/abs/10.1080/1364557032000119616>  
7  
8
- 9 26. Davis K, Drey N, Gould D. What are scoping studies? A review of the nursing  
10 literature. *Int J Nurs Stud* [Internet]. 2009 Oct [cited 2019 May 29];46(10):1386–400.  
11 Available from: <https://linkinghub.elsevier.com/retrieve/pii/S0020748909000698>  
12
- 13 27. Joffe H, Yardley L. *Research Methods for Clinical and Health Psychology* [Internet].  
14 SAGE Publications; 2004 [cited 2016 Dec 19]. 248 p. Available from:  
15 <https://books.google.com/books?hl=en&lr=&id=SHiUvmKzuFwC&pgis=1>  
16
- 17 28. Methods: Teaching thematic analysis | *The Psychologist* [Internet]. [cited 2017 Feb 8].  
18 Available from: [http://thepsychologist.bps.org.uk/volume-26/edition-2/methods-](http://thepsychologist.bps.org.uk/volume-26/edition-2/methods-teaching-thematic-analysis)  
19 [teaching-thematic-analysis](http://thepsychologist.bps.org.uk/volume-26/edition-2/methods-teaching-thematic-analysis)  
20
- 21 29. Zick SM, Sen A, Wyatt GK, Murphy SL, Arnedt JT, Harris RE. Investigation of 2  
22 Types of Self-administered Acupressure for Persistent Cancer-Related Fatigue in  
23 Breast Cancer Survivors: A Randomized Clinical Trial. *JAMA Oncol* [Internet]. 2016  
24 Nov 1 [cited 2019 Feb 14];2(11):1470–6. Available from:  
25 <http://oncology.jamanetwork.com/article.aspx?doi=10.1001/jamaoncol.2016.1867>  
26  
27
- 28 30. UKONS. UK Oncology Nurses Society Triage Tool [Internet]. [cited 2019 Jun 6].  
29 Available from: <http://necn.nhs.uk/wp-content/uploads/2018/05/UKONS-Tool-.pdf>  
30
- 31 31. UK CR. May I take your metaphor? – how we talk about cancer - Cancer Research UK  
32 - Science blog [Internet]. [cited 2019 Jun 6]. Available from:  
33 [https://scienceblog.cancerresearchuk.org/2015/09/28/may-i-take-your-metaphor-how-](https://scienceblog.cancerresearchuk.org/2015/09/28/may-i-take-your-metaphor-how-we-talk-about-cancer/)  
34 [we-talk-about-cancer/](https://scienceblog.cancerresearchuk.org/2015/09/28/may-i-take-your-metaphor-how-we-talk-about-cancer/)  
35
- 36 32. American Society of Clinical Oncology. Guidelines on Survivorship Care | ASCO  
37 [Internet]. 2014 [cited 2018 Apr 23]. Available from: [https://www.asco.org/practice-](https://www.asco.org/practice-guidelines/cancer-care-initiatives/prevention-survivorship/survivorship-compendium-0)  
38 [guidelines/cancer-care-initiatives/prevention-survivorship/survivorship-compendium-0](https://www.asco.org/practice-guidelines/cancer-care-initiatives/prevention-survivorship/survivorship-compendium-0)  
39
- 40 33. Royal College of Physicians. Using apps in clinical practice guidance | RCP London  
41 [Internet]. 2015 [cited 2019 Apr 18]. Available from:  
42 <https://www.rcplondon.ac.uk/guidelines-policy/using-apps-clinical-practice-guidance>  
43
- 44 34. Medicines & Healthcare products Regulatory Agency. Guidance: Medical device  
45 stand-alone software including apps (including IVDMDs) [Internet]. 2018. Available  
46 from:  
47 [https://assets.publishing.service.gov.uk/government/uploads/system/uploads/attachmen](https://assets.publishing.service.gov.uk/government/uploads/system/uploads/attachment_data/file/717865/Software_flow_chart_Ed_1-05.pdf)  
48 [t\\_data/file/717865/Software\\_flow\\_chart\\_Ed\\_1-05.pdf](https://assets.publishing.service.gov.uk/government/uploads/system/uploads/attachment_data/file/717865/Software_flow_chart_Ed_1-05.pdf)  
49
- 50 35. US Departments of Health and Human Services Food and Drug Administration, Center  
51 for Devices and Radiological Health C for BE and R. Mobile medical applications.  
52 Guidelines for Industry and Food and Drug Administration Staff [Internet]. 2015.  
53 Available from:  
54 [https://www.fda.gov/downloads/MedicalDevices/DeviceRegulationandGuidance/Guid](https://www.fda.gov/downloads/MedicalDevices/DeviceRegulationandGuidance/GuidanceDocuments/UCM263366.pdf)  
55 [anceDocuments/UCM263366.pdf](https://www.fda.gov/downloads/MedicalDevices/DeviceRegulationandGuidance/GuidanceDocuments/UCM263366.pdf)  
56  
57
- 58 36. van Velthoven MH, Wyatt JC, Meinert E, Brindley D, Wells G. How standards and  
59 user involvement can improve app quality: A lifecycle approach. *Int J Med Inform*  
60



- [Internet]. 2018 Oct 1 [cited 2019 Apr 19];118:54–7. Available from: <https://www.sciencedirect.com/science/article/pii/S1386505618307160?via%3Dihub>
37. National Information Board UG. Personalised Health and Care 2020. Using Data and Technology to Transform Outcomes for Patients and Citizens [Internet]. 2014. Available from: [https://assets.publishing.service.gov.uk/government/uploads/system/uploads/attachment\\_data/file/384650/NIB\\_Report.pdf](https://assets.publishing.service.gov.uk/government/uploads/system/uploads/attachment_data/file/384650/NIB_Report.pdf)
38. Wyatt JC. How can clinicians, specialty societies and others evaluate and improve the quality of apps for patient use? *BMC Med* [Internet]. 2018 Dec 3 [cited 2019 Apr 18];16(1):225. Available from: <https://bmcmedicine.biomedcentral.com/articles/10.1186/s12916-018-1211-7>
39. Grundy Q, Chiu K, Held F, Continella A, Bero L, Holz R. Data sharing practices of medicines related apps and the mobile ecosystem: traffic, content, and network analysis. *BMJ* [Internet]. 2019 Mar 20 [cited 2019 Apr 18];364:l920. Available from: <http://www.ncbi.nlm.nih.gov/pubmed/30894349>
40. Wolderslund M, Kofoed P-E, Holst R, Axboe M, Ammentorp J. Digital audio recordings improve the outcomes of patient consultations: A randomised cluster trial. *Patient Educ Couns* [Internet]. 2017 Feb [cited 2019 Apr 18];100(2):242–9. Available from: <http://www.ncbi.nlm.nih.gov/pubmed/27593087>
41. Clayton JM, Butow PN, Tattersall MHN, Devine RJ, Simpson JM, Aggarwal G, et al. Randomized Controlled Trial of a Prompt List to Help Advanced Cancer Patients and Their Caregivers to Ask Questions About Prognosis and End-of-Life Care. *J Clin Oncol* [Internet]. 2007 Feb 9 [cited 2019 Apr 18];25(6):715–23. Available from: <http://www.ncbi.nlm.nih.gov/pubmed/17308275>
42. Amundsen A, Bergvik S, Butow P, Tattersall MHN, Sørli T, Nordøy T. Supporting doctor-patient communication: Providing a question prompt list and audio recording of the consultation as communication aids to outpatients in a cancer clinic. *Patient Educ Couns* [Internet]. 2018 Sep [cited 2019 Apr 18];101(9):1594–600. Available from: <http://www.ncbi.nlm.nih.gov/pubmed/29703493>
43. Adam R, Burton CD, Bond CM, de Bruin M, Murchie P. Can patient-reported measurements of pain be used to improve cancer pain management? A systematic review and meta-analysis. *BMJ Support Palliat Care* [Internet]. 2016 Nov 22 [cited 2017 Jan 30]; Available from: <http://spcare.bmj.com/content/early/2016/11/22/bmjspcare-2016-001137.abstract>
44. Cambridge Analytica: The story so far - BBC News [Internet]. [cited 2019 Aug 19]. Available from: <https://www.bbc.co.uk/news/technology-43465968>
45. Social media urged to take “moment to reflect” after girl’s death | Media | The Guardian [Internet]. [cited 2019 Aug 19]. Available from: <https://www.theguardian.com/media/2019/jan/30/social-media-urged-to-take-moment-to-reflect-after-girls-death>
46. How we assess health apps and digital tools - NHS Digital [Internet]. [cited 2019 Aug 19]. Available from: <https://digital.nhs.uk/services/nhs-apps-library/guidance-for-health-app-developers-commissioners-and-assessors/how-we-assess-health-apps-and-digital-tools#how-the-assessment-works>

- 1  
2  
3 47. Tricco AC, Lillie E, Zarin W, O'Brien KK, Colquhoun H, Levac D, et al. PRISMA  
4 Extension for Scoping Reviews (PRISMA-ScR): Checklist and Explanation. Ann  
5 Intern Med [Internet]. 2018 Oct 2 [cited 2019 Jun 13];169(7):467. Available from:  
6 <http://annals.org/article.aspx?doi=10.7326/M18-0850>  
7  
8  
9  
10  
11  
12  
13  
14  
15  
16  
17  
18  
19  
20  
21  
22  
23  
24  
25  
26  
27  
28  
29  
30  
31  
32  
33  
34  
35  
36  
37  
38  
39  
40  
41  
42  
43  
44  
45  
46  
47  
48  
49  
50  
51  
52  
53  
54  
55  
56  
57  
58  
59  
60

For peer review only

**Figure 1: Identification and screening process for apps included in this review**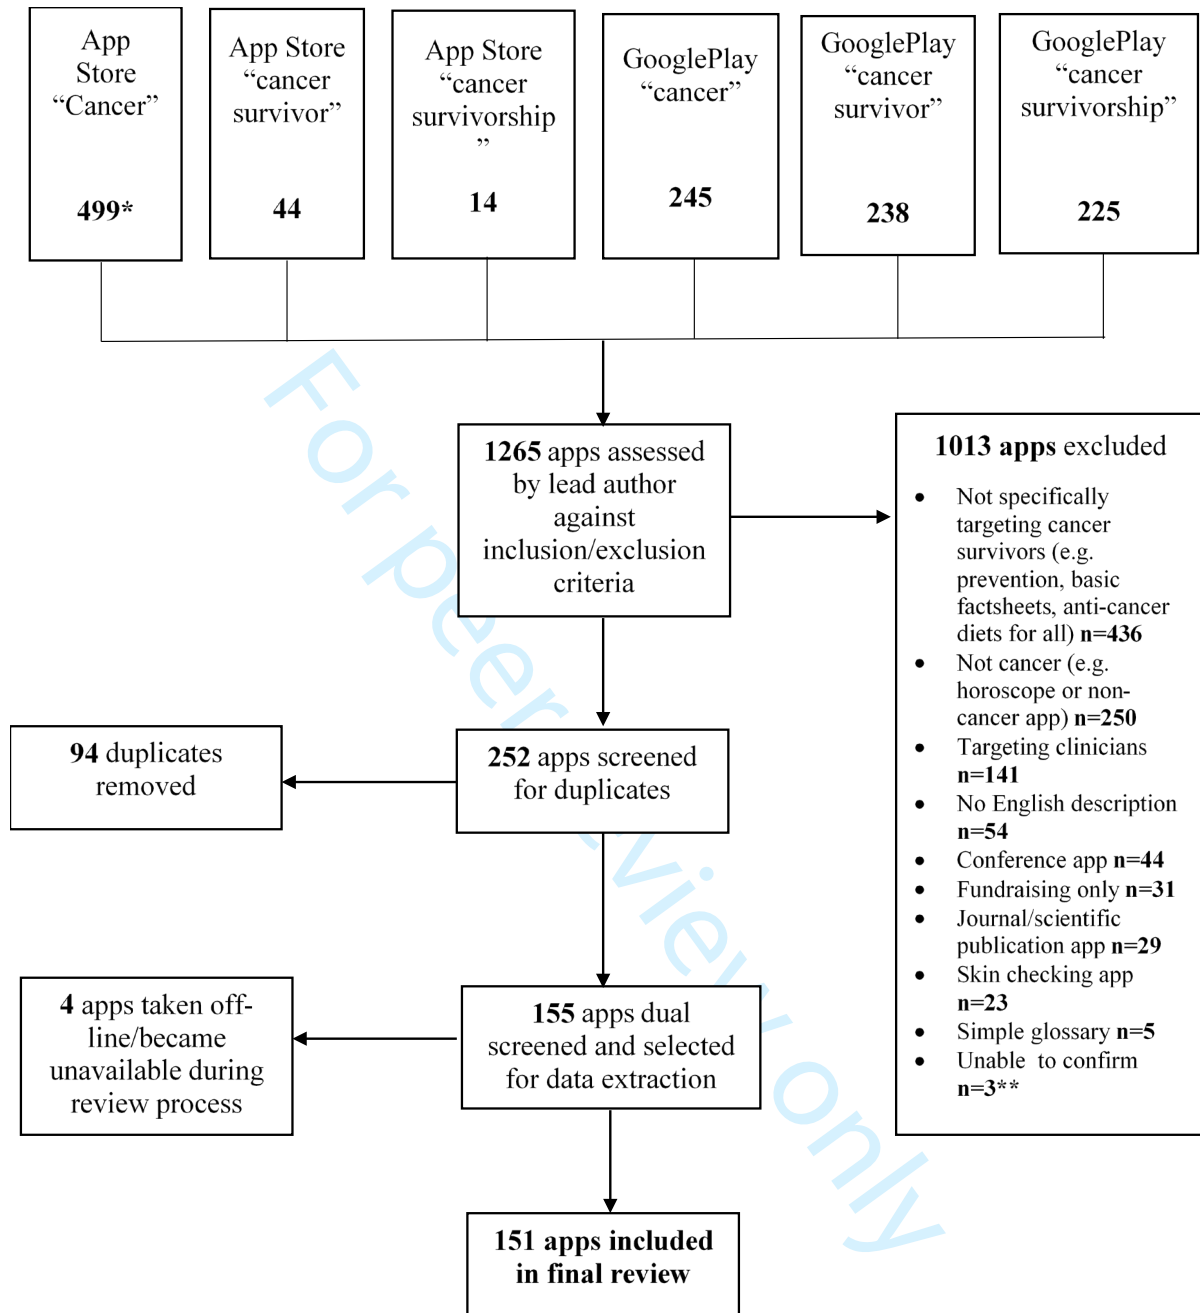

\*Apple's app store was searched up to and not including the 500<sup>th</sup> app on the on-line store: after several hundred apps, the apps became less relevant to our review

\*\* There were three apps which we were unable to find again after the initial searches: two (*faith.org*; and *ovarian cancer treatments (things to do)* seemed to be removed from the store, and there was an administrative error during recording the name of the third app, which led to a missing field in our exclusion file

**Table S1: Full list of apps and descriptive data extracted from stores.**

| Name of App                               | Name of developer                         | Cancer Type | Owner Nature*           | Country*    | Platform | Fee                       | Downloads (Google only) | Number of raters / (rating out of 5.0) Google | Number of raters / (rating out of 5.0) Apple \$ |
|-------------------------------------------|-------------------------------------------|-------------|-------------------------|-------------|----------|---------------------------|-------------------------|-----------------------------------------------|-------------------------------------------------|
| 1 in 3 Cancer Support                     | Origin Digital Limited                    | All         | Charity                 | UK          | Both     | Free                      | 10+                     | 1 (5.0)                                       | Not enough                                      |
| Adrenal cancer – others like me           | Eli Maliki                                | All         | Unclear                 | Unclear     | Google   | Free                      | 1000+                   | 2 (5.0)                                       | N/A                                             |
| Attack cancer using hypnosis              | Ron Eslinger (Healthy Visions)            | All         | Commercial              | USA         | Both     | £6.49 Google, £9.99 Apple | 10+                     | 2 (5.0)                                       | Not enough                                      |
| BCG Treatment                             | Rosewell Park Comprehensive cancer center | Bladder     | Healthcare organisation | USA         | Both     | Free                      | 50+                     | None                                          | Not enough                                      |
| BECCA – Breast cancer care app            | Breast cancer care                        | Breast      | Charity                 | UK          | Both     | Free                      | 5000+                   | 38 (4.5)                                      | 19 (4.5)                                        |
| BELONG Beating Cancer                     | BelongTail                                | All         | Commercial              | USA         | Both     | Free                      | 50000+                  | 661 (4.7)                                     | 29 (4.9)                                        |
| Best Prostate Cancer Treatment            | RL Technology LLC                         | Prostate    | Commercial              | Unclear     | Apple    | Free                      | N/A                     | N/A                                           | Not enough                                      |
| Bible verses for cancer – strength verses | Watchdis prayers                          | All         | Unclear                 | Netherlands | Google   | Free                      | 1000+                   | 26 (4.8)                                      | N/A                                             |
| BigC-Connect                              | Jane Boag                                 | All         | Charity                 | Singapore   | Both     | Free                      | 500+                    | 8 (5.0)                                       | Not enough                                      |
| Bladder Cancer Manager                    | point of care                             | Bladder     | Commercial              | USA         | Apple    | Free                      | N/A                     | N/A                                           | Not enough                                      |

|                                                |                                   |                |             |           |        |       |       |          |            |
|------------------------------------------------|-----------------------------------|----------------|-------------|-----------|--------|-------|-------|----------|------------|
| Blood cancer storylines                        | Self care catalysts               | Haematological | Commercial  | USA       | Both   | Free  | 50+   | none     | Not enough |
| Blood cancer treatment                         | Ahalya                            | Haematological | Unclear     | India     | Google | Free  | 500+  | 2 (5.0)  | N/A        |
| Boobytrapp                                     | Phoenix Consult PTE               | Breast         | Commercial  | Unclear   | Both   | Free  | 50+   | 2 (5.0)  | Not enough |
| Bowel Cancer                                   | Princeton Digital                 | Bowel          | Charity     | Australia | Both   | Free  | 1000+ | Missing  | Not enough |
| BRAVE Coalition                                | Tied Tech LLC                     | Breast         | Charity     | USA       | Apple  | Free  | N/A   | N/A      | Not enough |
| Breast Cancer Ally                             | University of Michigan            | Breast         | Academic    | USA       | Apple  | Free  | N/A   | N/A      | Not enough |
| Breast cancer Canada                           | Olive Branch of hope              | Breast         | Partnership | Canada    | Google | Free  | 10+   | none     | N/A        |
| Breast Cancer Diary                            | HomeInSync LLC                    | Breast         | Commercial  | USA       | Apple  | £4.99 | N/A   | N/A      | Not enough |
| Breast Cancer Healthline App                   | Healthline Networks Inc           | Breast         | Commercial  | USA       | Apple  | Free  | N/A   | N/A      | Not enough |
| Breast Cancer Manager                          | point of care                     | Breast         | Commercial  | USA       | Apple  | Free  | N/A   | N/A      | Not enough |
| Breast Cancer Social Network/My BC Team        | My Health teams                   | Breast         | Commercial  | USA       | Both   | Free  | 1000+ | 44 (4.2) | Not enough |
| Breast Cancer Survivor                         | Portable Medical technology Ltf   | Breast         | Charity     | Ireland   | Apple  | Free  | N/A   | N/A      | Not enough |
| Breast Cancer: Beyond the shock                | National breast cancer foundation | Breast         | Charity     | USA       | Apple  | Free  | N/A   | N/A      | Not enough |
| Breast cancer: information about breast cancer | Doctor Apps                       | Breast         | Commercial  | Unclear   | Google | Free  | 1000+ | 16 (4.6) | N/A        |

|                                         |                                                                |                    |                         |           |        |                           |         |          |            |
|-----------------------------------------|----------------------------------------------------------------|--------------------|-------------------------|-----------|--------|---------------------------|---------|----------|------------|
| Breast friends app                      | Barry O'Mahoney                                                | Breast             | Charity                 | USA       | Both   | Free                      | 10+     | None     | Not enough |
| Breast Cancer Gibraltar                 | Alan Pereira                                                   | Breast             | Charity                 | Gibraltar | Apple  | Free                      | N/A     | N/A      | Not enough |
| Bubble health                           | bubble health ltd                                              | Breast and ovarian | Commercial              | Unclear   | Both   | Free                      | 10+     | 2 (5.0)  | Not enough |
| CanAdvice+                              | MySmartHealth                                                  | Breast             | Healthcare organisation | UK        | Google | Free                      | 10+     | none     | N/A        |
| Cancel Cancer                           | Infinite Monkeys LLC                                           | All                | Commercial              | Unclear   | Apple  | Free                      | N/A     | N/A      | Not enough |
| Cancer awareness network                | Lewis Educational Consultants, Inc                             | All                | Charity                 | USA       | Both   | Free                      | 100+    | 10 (4.6) | Not enough |
| Cancer Care and Research News           | Dana-Farber Cancer Institute                                   | All                | Healthcare organisation | USA       | Apple  | Free                      | N/A     | N/A      | Not enough |
| Cancer chemotherapy and healing colours | (Ron) Michael Eslinger (Healthy Visions)                       | All                | Commercial              | USA       | Both   | £6.49 Google, £8.99 Apple | 10+     | 2 (3.0)  | Not enough |
| Cancer Connect                          | Maree Hamilton                                                 | All                | Commercial              | Australia | Apple  | Free                      | N/A     | N/A      | Not enough |
| Cancer cure                             | Balogh Jozsef Zoltan                                           | All                | Unclear                 | Hungary   | Google | £28.90                    | 1+      | none     | N/A        |
| Cancer curing foods                     | Proven Digital Web Solutions                                   | All                | Commercial              | India     | Google | Free                      | 10,000+ | 98 (4.4) | N/A        |
| Cancer defeated                         | Christopher DiCristo, MagnifyMobile                            | All                | Commercial              | USA       | Both   | Free                      | 100+    | 2 (2.0)  | Not enough |
| Cancer Emergency Response Tool          | Dorset cancer centre, developed by Portable Medical Technology | All                | Healthcare organisation | UK        | Apple  | Free                      | N/A     | N/A      | Not enough |
| Cancer fighting app                     | Bhaktiedge                                                     | All                | Unclear                 | Unclear   | Google | Free                      | 50+     | None     | N/A        |
| Cancer fighting foods                   | Ayoub Bousetta, B6Squad Dev.                                   | All                | Commercial              | Morocco   | Google | Free                      | 10,000+ | 29 (4.2) | N/A        |

|                                |                                                           |     |                  |                 |        |      |         |           |            |
|--------------------------------|-----------------------------------------------------------|-----|------------------|-----------------|--------|------|---------|-----------|------------|
| Cancer iChart                  | Liverpool Drug Interactions Group                         | All | Academic         | UK              | Both   | Free | 50+     | 2 (4.0)   | Not enough |
| Cancer Sites@Jeff              | Thomas Jefferson University                               | All | Academic         | USA             | Apple  | Free | N/A     | N/A       | Not enough |
| Cancer Support Community VVSB  | Cancer support community VVSB, developed by Globonet Inc. | All | Charity          | USA             | Apple  | Free | N/A     | N/A       | Not enough |
| Cancer Surveillance            | GoMLV                                                     | All | Commercial       | Unclear         | Google | Free | 1000+   | 21 (3.7)  | N/A        |
| Cancer survivorship connection | Peachtree Solutions LLC                                   | All | Partnership      | USA             | Both   | Free | 10+     | 1 (5.0)   | Not enough |
| Cancer Together                | Independent Energy Consultancy Research                   | All | Unclear          | France          | Both   | Free | 10+     | none      | Not enough |
| Cancer-track and heal          | Camille Madelon                                           | All | Commercial       | Unclear         | Apple  | Free | N/A     | N/A       | Not enough |
| Cancer Treatment Calendar      | Long Nguyen                                               | All | Commercial       | Unclear         | Apple  | Free | N/A     | N/A       | Not enough |
| Cancer treatment tips          | globalapps24                                              | All | Commercial       | Unclear         | Google | Free | 100+    | none      | N/A        |
| Cancer wellness                | S J Grant Unicorn Pacific Corps                           | All | Commercial       | Pacific Islands | Apple  | Free | N/A     | N/A       | Not enough |
| Cancer.Fitness Community       | MAWaza LLC                                                | All | Commercial       | USA             | Both   | Free | 50+     | none      | Not enough |
| Cancer.Net mobile              | ASCO                                                      | All | Clinical Society | USA             | Both   | Free | 10,000+ | 212 (4.3) | Not enough |
| CancerAid                      | CancerAid PTY Ltd                                         | All | Commercial       | >1              | Both   | Free | 1,000+  | 25 (3.7)  | Not enough |
| CancerIS                       | LemonMD                                                   | All | Commercial       | USA             | Apple  | Free | N/A     | N/A       | Not enough |

|                                   |                                                                             |            |                           |           |        |                              |      |          |            |
|-----------------------------------|-----------------------------------------------------------------------------|------------|---------------------------|-----------|--------|------------------------------|------|----------|------------|
| Cancerosity – cancer network      | Throwr Pty Ltd                                                              | All        | Commercial                | Australia | Apple  | Free                         | N/A  | N/A      | Not enough |
| CancerStop                        | Queromatics                                                                 | All        | Commercial                | USA       | Google | Free                         | 100+ | 15 (5.0) | N/A        |
| CanDi – cancer diet app           | Faculty of Health Sciences<br>University Universiti Sultan<br>Zainal Abidin | All        | Academic                  | Malaysia  | Google | Free                         | 500+ | 59 (4.7) | N/A        |
| CanHOPE cancer support            | LEAPP for Parkway Cancer Centre                                             | All        | Charity                   | Singapore | Apple  | Free                         | N/A  | N/A      | Not enough |
| CarcinoidNETs<br>HealthStorylines | Self care catalysts                                                         | Carcinoid  | Partnership               | USA       | Both   | Free                         | 500+ | 8 (4.2)  | Not enough |
| Chemo brain                       | Katharine Hargrove                                                          | All        | Commercial                | USA       | Google | Free                         | 100+ | 1 (5.0)  | N/A        |
| Chemotherapy                      | Rahul Baweja, Alpesh Patel                                                  | All        | Unclear                   | Unclear   | Both   | Free                         | 100+ | None     | Not enough |
| Cleveland Clinic Cancer Trials    | Cleveland Clinic Innovations                                                | All        | Healthcare organisation   | USA       | Apple  | Free                         | N/A  | N/A      | Not enough |
| ClinTrial refer breast cancer     | Haematology Clinical Research Network, New South Wales                      | Breast     | Clinical research network | >1        | Both   | Free                         | 100+ | 1 (5.0)  | Not enough |
| ClinTrial Refer Cancer Genetics   | Haematology Clinical Research Network, New South Wales                      | All        | Clinical research network | >1        | Both   | Free                         | 50+  | 1 (5.0)  | Not enough |
| ClinTrial Refer SA Cancer         | Haematology Clinical Research Network, New South Wales                      | All        | Clinical research network | Australia | Both   | Free                         | 10+  | None     | Not enough |
| Cnected                           | Get Cnected Ltd                                                             | All        | Commercial                | UK        | Apple  | Free                         | N/A  | N/A      | 14 (4.7)   |
| Colon cancer                      | (Ron) Michael Eslinger Healthy Visions                                      | Colorectal | Commercial                | USA       | Both   | £5.49 Google,<br>£8.99 Apple | 1+   | None     | Not enough |



|                                       |                                      |          |                         |           |        |         |         |          |            |
|---------------------------------------|--------------------------------------|----------|-------------------------|-----------|--------|---------|---------|----------|------------|
| Community guide for women with cancer | Charach Cancer Treatment Center      | All      | Healthcare organisation | USA       | Both   | Free    | 50+     | 2 (5.0)  | Not enough |
| Don't die 2                           | MiSong Foundation. Org               | All      | Unclear                 | USA       | Google | £299.99 | 0+      | None     | N/A        |
| E-home app questionnaires             | Alice Lee Centre for Nursing Studies | Breast   | Academic                | Singapore | Google | Free    | 10+     | None     | N/A        |
| Emory AWAKE                           | Emory University                     | All      | Academic                | USA       | Both   | Free    | 10+     | None     | Not enough |
| Eva: Cancer Support                   | Eva LLC                              | All      | Commercial              | USA       | Both   | Free    | 10+     | None     | Not enough |
| Eye cancer treatments                 | Things To Do                         | Eye      | Commercial              | Unclear   | Google | Free    | 10+     | None     | N/A        |
| Fight cancer naturally                | Dr Isaac's Holistic Wellness         | All      | Healthcare organisation | India     | Google | Free    | 100+    | 1 (1.0)  | N/A        |
| Focus on lymphoma                     | Lymphoma Research Foundation         | Lymphoma | Charity                 | USA       | Both   | Free    | 5,000+  | 53 (4.7) | 9 (4.4)    |
| For Cancer Care                       | AMC Energy Canada                    | All      | Commercial              | Canada    | Both   | Free    | 10+     | None     | Not enough |
| Hope abounds inc.                     | Hope Abounds Imc                     | All      | Charity                 | USA       | Both   | Free    | 10+     | None     | Not enough |
| iCancerHealth Cancer Care             | Medocity                             | All      | Commercial              | USA       | Both   | Free    | 1,000 + | 33 (4.4) | Not enough |
| Inkspiration                          | Crispin Porter & Bogusky             | Breast   | Charity                 | USA       | Apple  | Free    | N/A     | N/A      | Not enough |
| Inspiration of cancer survivor story  | CaveApps                             | All      | Commercial              | Malaysia  | Google | Free    | 10+     | None     | N/A        |
| It's a MANTHING – Prostate Cancer     | Prostaaid                            | Prostate | Charity                 | UK        | Both   | Free    | 500+    | 5 (5.0)  | Not enough |

|    |                                          |                             |                   |             |         |        |                                     |      |         |            |
|----|------------------------------------------|-----------------------------|-------------------|-------------|---------|--------|-------------------------------------|------|---------|------------|
| 1  | Ketogenic therapy for cancer             | seawellsoft private Limited | All               | Commercial  | India   | Both   | £9.49<br>Google,<br>£12.99<br>Apple | 10+  | 6 (4.8) | Not enough |
| 2  | Kidney cancer health storylines          | self care catalysts         | Kidney            | Commercial  | >1      | Apple  | Free                                | N/A  | N/A     | Not enough |
| 3  | Kidney cancer manager                    | point of care               | Kidney            | Commercial  | USA     | Apple  | Free                                | N/A  | N/A     | Not enough |
| 4  | Kids cancer meds                         | David Ziegler               | All               | Commercial  | Unclear | Both   | Free                                | 10+  | None    | Not enough |
| 5  | Live like Cameron                        | Melisa Fulling/ Rooterdog   | Childhood cancers | Charity     | USA     | Both   | Free                                | 50+  | 1 (5.0) | Not enough |
| 6  | Liver cancer manager                     | point of care               | Liver             | Commercial  | USA     | Apple  | Free                                | N/A  | N/A     | Not enough |
| 7  | Living with cancer                       | Things To Do                | All               | Commercial  | Unclear | Google | Free                                | 100+ | None    | N/A        |
| 8  | Loving meditations                       | Mind Health LLC             | All               | Commercial  | USA     | Both   | Free                                | 10+  | Missing | Not enough |
| 9  | Lung Cancer Foundation                   | Open cancer network         | Lung              | Charity     | USA     | Apple  | Free                                | N/A  | N/A     | Not enough |
| 10 | Lung Cancer Manager                      | point of care               | Lung              | Commercial  | USA     | Apple  | Free                                | N/A  | N/A     | Not enough |
| 11 | Lung cancer navigator                    | Lungevity foundation        | Lung              | Charity     | USA     | Both   | Free                                | 100+ | 2 (3.0) | Not enough |
| 12 | Lung cancer treatment                    | Things To Do                | Lung              | Commercial  | Unclear | Google | Free                                | 100+ | None    | N/A        |
| 13 | Malecare prostate cancer                 | Malecare                    | Prostate          | Charity     | USA     | Apple  | Free                                | N/A  | N/A     | Not enough |
| 14 | Markey cancer center clinical trials app | University of Kentucky      | All               | Partnership | USA     | Apple  | Free                                | N/A  | N/A     | Not enough |

|                                                   |                                                                |                             |                         |         |        |                           |         |           |            |
|---------------------------------------------------|----------------------------------------------------------------|-----------------------------|-------------------------|---------|--------|---------------------------|---------|-----------|------------|
| MASCC Antiemesis Tool                             | Multinational Association of Supportive Care in Cancer (MASCC) | All                         | Partnership             | USA     | Both   | Free                      | 1000+   | 8 (4+)    | Not enough |
| MD Anderson Mobile                                | MD Anderson cancer center                                      | All                         | Healthcare organisation | USA     | Both   | Free                      | 10,000+ | 305 (4.2) | Not enough |
| Melanoma UK                                       | Melanoma UK and Vitaccess LTd                                  | Melanoma                    | Partnership             | UK      | Both   | Free                      | 100+    | 2 (5.0)   | Not enough |
| Merry medicine                                    | 9wise                                                          | All                         | Commercial              | >1      | Google | £7.49                     | 1+      | 1 (5.0)   | N/A        |
| Mesothelioma Malignant Tumor Staging chemotherapy | Eduardo D'Avila                                                | Mesothelioma                | Unclear                 | USA     | Google | Free                      | 50+     | 4 (5.0)   | N/A        |
| MeTime Acupressure                                | University of Michigan                                         | All                         | Academic                | USA     | Both   | £9.49 Google, £9.99 Apple | 5+      | None      | Not enough |
| Mindful cancer                                    | Gordon Mullins                                                 | All                         | Unclear                 | Unclear | Apple  | Free                      | N/A     | N/A       | Not enough |
| Mouth cancer treatment                            | Things To Do                                                   | Oral                        | Commercial              | Unclear | Google | Free                      | 100+    | None      | N/A        |
| MVR Cancer Centre                                 | MVR Cancer Centre and research institute, Calicut              | All                         | Healthcare organisation | India   | Google | Free                      | 100+    | 5 (5.0)   | N/A        |
| My breast cancer advocate                         | Pathways2healing.us                                            | Breast                      | Commercial              | USA     | Google | £1.22                     | 10+     | 3 (5.0)   | N/A        |
| My Cancer Coach                                   | Genomic health                                                 | Breast, prostate, and colon | Partnership             | USA     | Both   | Free                      | 10,000+ | 65 (4.4)  | Not enough |
| My Care Plan – cancer survivors                   | Journey forward                                                | All                         | Partnership             | USA     | Both   | Free                      | 500+    | 4 (4.0)   | Not enough |
| My Head & Neck Cancer Manager                     | point of care                                                  | Head and neck               | Commercial              | USA     | Apple  | Free                      | N/A     | N/A       | Not enough |

|                                           |                                                           |                     |                         |         |        |      |        |          |            |
|-------------------------------------------|-----------------------------------------------------------|---------------------|-------------------------|---------|--------|------|--------|----------|------------|
| My liver                                  | AGF studios Ltd for National Health Service               | Liver               | Healthcare organisation | UK      | Apple  | Free | N/A    | N/A      | 14 (5.0)   |
| My Pancreas                               | AGF studios Ltd for National Health Service               | Pancreatic          | Healthcare organisation | UK      | Apple  | Free | N/A    | N/A      | 7 (5.0)    |
| My Prostate Cancer Manager                | point of care                                             | Prostate            | Commercial              | USA     | Apple  | Free | N/A    | N/A      | Not enough |
| MyMSK                                     | Memorial Sloan-Kettering Cancer Center                    | All                 | Healthcare organisation | USA     | Both   | Free | 1,000+ | 4 (3.8)  | Not enough |
| NCCN Patient Guides for Cancer            | National Comprehensive Cancer Network                     | All                 | Charity                 | USA     | Both   | Free | 1,000+ | 4 (4.5)  | Not enough |
| NED for prostate cancer                   | University Health Network, Toronto                        | Prostate            | Academic                | Canada  | Both   | Free | 10+    | None     | Not enough |
| ONCompanion                               | ONCompanion foundation programmed by we builld technology | All                 | Charity                 | India   | Google | Free | 10+    | 3 (5.0)  | N/A        |
| OneRemission                              | OneRemission                                              | All                 | Commercial              | USA     | Apple  | Free | N/A    | N/A      | Not enough |
| Ovarian Cancer Symptoms Diary             | Ovarian Cancer Action (programmed by electric putty)      | Ovarian             | Charity                 | UK      | Both   | Free | 1,000+ | 7 (4.3)  | Not enough |
| OWise breast cancer                       | Px Healthcare B.V. Ltd                                    | Breast              | Commercial              | >1      | Both   | Free | 1,000+ | 10 (4.4) | Not enough |
| Oxford Cancer and Haematology Outpatients | Oxford University Hospitals NHS foundation                | All                 | Healthcare organisation | UK      | Apple  | Free | N/A    | N/A      | Not enough |
| Personalized sarcoma care                 | Mobile Pioneers BV                                        | Soft tissue sarcoma | Unclear                 | Unclear | Both   | Free | 100+   | 8 (4+)   | Not enough |
| Phil's friends                            | Phils friends organisation, developed by subsplash inc    | All                 | Charity                 | USA     | Both   | Free | 50+    | 1 (5.0)  | Not enough |
| PM Cancer Journey                         | University Health Network, Toronto                        | All                 | Partnership             | Canada  | Both   | Free | 500+   | 6 (4.8)  | Not enough |

|                                                 |                                                                          |                |                         |           |        |      |        |          |            |
|-------------------------------------------------|--------------------------------------------------------------------------|----------------|-------------------------|-----------|--------|------|--------|----------|------------|
| Pocket Cancer Care Guide                        | National Coalition for Cancer Survivorship                               | All            | Charity                 | USA       | Apple  | Free | N/A    | N/A      | Not enough |
| Pratheeksha                                     | Pratheeksha clinic                                                       | All            | Healthcare organisation | India     | Both   | Free | 100+   | 14 (4.8) | Not enough |
| Prostate cancer support group Gibraltar         | Prostate cancer support group, Gibraltar, developed by Alan Pereira      | Prostate       | Charity                 | Gibraltar | Apple  | Free | N/A    | N/A      | Not enough |
| Prostate cancer treatment                       | Creative live apps                                                       | Prostate       | Unclear                 | Unclear   | Google | Free | 10+    | None     | N/A        |
| Prostate cancer we have your back               | Infinite Monkeys LLC                                                     | Prostate       | Unclear                 | Unclear   | Apple  | Free | N/A    | N/A      | Not enough |
| Qigong for cancer healing and prevention        | Yang's Martial Arts Association Publication Center, Inc.                 | All            | Commercial              | USA       | Both   | Free | 100+   | None     | Not enough |
| Radiotherapy                                    | incroyable future for skin safety.com                                    | All            | Commercial              | Canada    | Google | Free | 50+    | None     | N/A        |
| RB-World App                                    | KinderAugenKrebsStiftung KAKS (Childrens' eye cancer foundation Germany_ | Retinoblastoma | Charity                 | Germany   | Both   | Free | 100+   | 2 (4+)   | Not enough |
| Safe and easy cancer/ Easy ways to treat cancer | 999 Apps Developer                                                       | All            | Unclear                 | Unclear   | Google | Free | 10+    | 1 (5.0)  | N/A        |
| SCICancer Clinical Trials                       | Stanford University                                                      | All            | Partnership             | USA       | Both   | Free | 100+   | None     | Not enough |
| Self Care During Cancer                         | Nearspace inc for genetech inc, anthem inc                               | All            | Partnership             | USA       | Both   | Free | 1,000+ | 6 (4.7)  | Not enough |
| Signs and symptoms breast cancer                | Built By Doctors Ltd                                                     | Breast         | Commercial              | USA       | Both   | Free | 100+   | None     | Not enough |
| Skin Cancer Manager                             | point of care                                                            | Skin           | Commercial              | USA       | Apple  | Free | N/A    | N/A      | Not enough |

|                                |                                            |            |                         |             |        |      |        |          |            |
|--------------------------------|--------------------------------------------|------------|-------------------------|-------------|--------|------|--------|----------|------------|
| Stupid Cancer                  | Gryt health for stupid cancer.org          | All        | Charity                 | USA         | Both   | Free | 1,000+ | 10 (3.9) | Not enough |
| Super food to fight for cancer | cyclonblast mobile apps                    | All        | Unclear                 | unclear     | Google | Free | 100+   | 3 (4.3)  | N/A        |
| Survivor care                  | University medical centre Groningen        | All        | Healthcare organisation | Netherlands | Apple  | Free | N/A    | N/A      | Not enough |
| SwiSupport – HealingMusic      | Jun-Wei Su                                 | All        | Commercial              | Unclear     | Apple  | Free | N/A    | N/A      | Not enough |
| T.I.N.A                        | Kognito                                    | All        | Partnership             | USA         | Both   | Free | 10+    | None     | Not enough |
| Testicular cancer              | Expert health studios                      | Testicular | Commercial              | unclear     | Google | Free | 5,000+ | 13 (3.8) | N/A        |
| Thrivor                        | thrivor pty ltd                            | All        | Commercial              | unclear     | Both   | Free | 100+   | 4 (5.0)  | Not enough |
| Treat prostate cancer          | martinandoapp                              | Prostate   | Commercial              | unclear     | Google | Free | 500+   | 1 (5.0)  | Not enough |
| Treating bladder cancer        | NonitaDev                                  | Bladder    | Unclear                 | unclear     | Google | Free | 50+    | None     | N/A        |
| Triple negative breast cancer  | Kognito                                    | Breast     | Partnership             | USA         | Both   | Free | 100+   | 1 (5.0)  | Not enough |
| Twist out cancer               | Rochishna Aloor                            | All        | Charity                 | >1          | Apple  | Free | N/A    | N/A      | Not enough |
| Types of cancer treatment      | Dinatale                                   | All        | Commercial              | Unclear     | Google | Free | 100+   | 2 (3.0)  | N/A        |
| Untire: Beating cancer fatigue | tired of cancer                            | All        | Charity                 | Netherlands | Both   | Free | 1,000+ | 43 (4.5) | Not enough |
| Various cancer cures           | EmirZIApps                                 | All        | Commercial              | unclear     | Google | Free | 500+   | 2 (3.0)  | N/A        |
| Ways to fight off cancer       | Koodalappz on android, sathish bc on apple | All        | Commercial              | unclear     | Both   | Free | 1,000+ | 3 (5.0)  | N/A        |

|                 |                 |     |            |       |        |      |     |      |            |
|-----------------|-----------------|-----|------------|-------|--------|------|-----|------|------------|
| Whip Cancer     | Copley Raff Inc | All | Commercial | USA   | Apple  | Free | N/A | N/A  | Not enough |
| Yoga vs. cancer | Antioch studio  | All | Commercial | Spain | Google | Free | 10+ | None | N/A        |

\*The nature of the owner and country of origin was open to a degree of interpretation/judgement by the authors, and therefore we involved two authors in extracting this data independently. Linked websites were visited. There were high levels of agreement and we reached consensus by discussion. We have applied the term “charity” to cover non-profit organisations.

\$Google Play will publish a “star” rating when there is one or more reviews of the app. Many of the apps available via Apple’s app store reported that there were not enough reviews to present a star rating. Ratings were accurate to November 2018.

1  
2  
3  
4  
5  
6  
7  
8  
9  
10  
11  
12  
13  
14  
15  
16  
17  
18  
19  
20  
21  
22  
23  
24  
25  
26  
27  
28  
29  
30  
31  
32  
33  
34  
35  
36  
37  
38  
39  
40  
41  
42  
43  
44  
45  
46

## Preferred Reporting Items for Systematic reviews and Meta-Analyses extension for Scoping Reviews (PRISMA-ScR) Checklist

| SECTION                           | ITEM | PRISMA-ScR CHECKLIST ITEM                                                                                                                                                                                                                                                                                  | REPORTED ON PAGE #                     |
|-----------------------------------|------|------------------------------------------------------------------------------------------------------------------------------------------------------------------------------------------------------------------------------------------------------------------------------------------------------------|----------------------------------------|
| <b>TITLE</b>                      |      |                                                                                                                                                                                                                                                                                                            |                                        |
| Title                             | 1    | Identify the report as a scoping review.                                                                                                                                                                                                                                                                   | 1                                      |
| <b>ABSTRACT</b>                   |      |                                                                                                                                                                                                                                                                                                            |                                        |
| Structured summary                | 2    | Provide a structured summary that includes (as applicable): background, objectives, eligibility criteria, sources of evidence, charting methods, results, and conclusions that relate to the review questions and objectives.                                                                              | 2                                      |
| <b>INTRODUCTION</b>               |      |                                                                                                                                                                                                                                                                                                            |                                        |
| Rationale                         | 3    | Describe the rationale for the review in the context of what is already known. Explain why the review questions/objectives lend themselves to a scoping review approach.                                                                                                                                   | 3                                      |
| Objectives                        | 4    | Provide an explicit statement of the questions and objectives being addressed with reference to their key elements (e.g., population or participants, concepts, and context) or other relevant key elements used to conceptualize the review questions and/or objectives.                                  | 3                                      |
| <b>METHODS</b>                    |      |                                                                                                                                                                                                                                                                                                            |                                        |
| Protocol and registration         | 5    | Indicate whether a review protocol exists; state if and where it can be accessed (e.g., a Web address); and if available, provide registration information, including the registration number.                                                                                                             | X, reported in limitations, discussion |
| Eligibility criteria              | 6    | Specify characteristics of the sources of evidence used as eligibility criteria (e.g., years considered, language, and publication status), and provide a rationale.                                                                                                                                       | 5                                      |
| Information sources*              | 7    | Describe all information sources in the search (e.g., databases with dates of coverage and contact with authors to identify additional sources), as well as the date the most recent search was executed.                                                                                                  | 5                                      |
| Search                            | 8    | Present the full electronic search strategy for at least 1 database, including any limits used, such that it could be repeated.                                                                                                                                                                            | 5                                      |
| Selection of sources of evidence† | 9    | State the process for selecting sources of evidence (i.e., screening and eligibility) included in the scoping review.                                                                                                                                                                                      | 5                                      |
| Data charting process‡            | 10   | Describe the methods of charting data from the included sources of evidence (e.g., calibrated forms or forms that have been tested by the team before their use, and whether data charting was done independently or in duplicate) and any processes for obtaining and confirming data from investigators. | 6                                      |
| Data items                        | 11   | List and define all variables for which data were sought and any assumptions and simplifications made.                                                                                                                                                                                                     | 6                                      |
| Critical appraisal of individual  | 12   | If done, provide a rationale for conducting a critical appraisal of included sources of evidence; describe                                                                                                                                                                                                 | Not done                               |

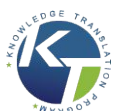



| SECTION                                       | ITEM | PRISMA-ScR CHECKLIST ITEM                                                                                                                                                                       | REPORTED ON PAGE #        |
|-----------------------------------------------|------|-------------------------------------------------------------------------------------------------------------------------------------------------------------------------------------------------|---------------------------|
| sources of evidence§                          |      | the methods used and how this information was used in any data synthesis (if appropriate).                                                                                                      |                           |
| Synthesis of results                          | 13   | Describe the methods of handling and summarizing the data that were charted.                                                                                                                    | 7                         |
| <b>RESULTS</b>                                |      |                                                                                                                                                                                                 |                           |
| Selection of sources of evidence              | 14   | Give numbers of sources of evidence screened, assessed for eligibility, and included in the review, with reasons for exclusions at each stage, ideally using a flow diagram.                    | 23                        |
| Characteristics of sources of evidence        | 15   | For each source of evidence, present characteristics for which data were charted and provide the citations.                                                                                     | Supplementary data        |
| Critical appraisal within sources of evidence | 16   | If done, present data on critical appraisal of included sources of evidence (see item 12).                                                                                                      | Not done                  |
| Results of individual sources of evidence     | 17   | For each included source of evidence, present the relevant data that were charted that relate to the review questions and objectives.                                                           | 7-17                      |
| Synthesis of results                          | 18   | Summarize and/or present the charting results as they relate to the review questions and objectives.                                                                                            | 7-17                      |
| <b>DISCUSSION</b>                             |      |                                                                                                                                                                                                 |                           |
| Summary of evidence                           | 19   | Summarize the main results (including an overview of concepts, themes, and types of evidence available), link to the review questions and objectives, and consider the relevance to key groups. | 18                        |
| Limitations                                   | 20   | Discuss the limitations of the scoping review process.                                                                                                                                          | 20                        |
| Conclusions                                   | 21   | Provide a general interpretation of the results with respect to the review questions and objectives, as well as potential implications and/or next steps.                                       | 21                        |
| <b>FUNDING</b>                                |      |                                                                                                                                                                                                 |                           |
| Funding                                       | 22   | Describe sources of funding for the included sources of evidence, as well as sources of funding for the scoping review. Describe the role of the funders of the scoping review.                 | Click here to enter text. |

JBI = Joanna Briggs Institute; PRISMA-ScR = Preferred Reporting Items for Systematic reviews and Meta-Analyses extension for Scoping Reviews.

\* Where *sources of evidence* (see second footnote) are compiled from, such as bibliographic databases, social media platforms, and Web sites.

† A more inclusive/heterogeneous term used to account for the different types of evidence or data sources (e.g., quantitative and/or qualitative research, expert opinion, and policy documents) that may be eligible in a scoping review as opposed to only studies. This is not to be confused with *information sources* (see first footnote).

‡ The frameworks by Arksey and O'Malley (6) and Levac and colleagues (7) and the JBI guidance (4, 5) refer to the process of data extraction in a scoping review as data charting.

§ The process of systematically examining research evidence to assess its validity, results, and relevance before using it to inform a decision. This term is used for items 12 and 19 instead of "risk of bias" (which is more applicable to systematic reviews of interventions) to include and acknowledge the various sources of evidence that may be used in a scoping review (e.g., quantitative and/or qualitative research, expert opinion, and policy document).

From: Tricco AC, Lillie E, Zarin W, O'Brien KK, Colquhoun H, Levac D, et al. PRISMA Extension for Scoping Reviews (PRISMA-ScR): Checklist and Explanation. *Ann Intern Med.* ;169:467–473. doi: 10.7326/M18-0850



St. Michael's

Inspired Care.  
Inspiring Science.

For peer review only - <http://bmjopen.bmj.com/site/about/guidelines.xhtml>

# BMJ Open

## Publicly available apps for Cancer Survivors: a scoping review

|                                 |                                                                                                                                                                                                                                                                                                                                                                                                                               |
|---------------------------------|-------------------------------------------------------------------------------------------------------------------------------------------------------------------------------------------------------------------------------------------------------------------------------------------------------------------------------------------------------------------------------------------------------------------------------|
| Journal:                        | <i>BMJ Open</i>                                                                                                                                                                                                                                                                                                                                                                                                               |
| Manuscript ID                   | bmjopen-2019-032510.R2                                                                                                                                                                                                                                                                                                                                                                                                        |
| Article Type:                   | Original research                                                                                                                                                                                                                                                                                                                                                                                                             |
| Date Submitted by the Author:   | 04-Sep-2019                                                                                                                                                                                                                                                                                                                                                                                                                   |
| Complete List of Authors:       | Adam, Rosalind; University of Aberdeen College of Life Sciences and Medicine, Academic Primary Care<br>McMichael, Drew; University of Aberdeen College of Life Sciences and Medicine, Academic Primary Care<br>Powell, Daniel; University of Aberdeen, Aberdeen Health Psychology Group, Institute of Applied Health Sciences, Rowett Institute<br>Murchie, Peter; University of Aberdeen, Division of Applied Health Science |
| <b>Primary Subject Heading</b>: | Oncology                                                                                                                                                                                                                                                                                                                                                                                                                      |
| Secondary Subject Heading:      | Health informatics                                                                                                                                                                                                                                                                                                                                                                                                            |
| Keywords:                       | ONCOLOGY, Health informatics < BIOTECHNOLOGY & BIOINFORMATICS, Information technology < BIOTECHNOLOGY & BIOINFORMATICS, Telemedicine < BIOTECHNOLOGY & BIOINFORMATICS, World Wide Web technology < BIOTECHNOLOGY & BIOINFORMATICS, Cancer                                                                                                                                                                                     |
|                                 |                                                                                                                                                                                                                                                                                                                                                                                                                               |

SCHOLARONE™  
Manuscripts

## Publicly available apps for Cancer Survivors: a scoping review

Corresponding author: Rosalind Adam. Academic Primary Care, Institute of Applied Health Sciences, University of Aberdeen, Room 1:020, Polwarth Building, Foresterhill, Aberdeen, UK. AB25 2ZD.

Email [rosalindadam@abdn.ac.uk](mailto:rosalindadam@abdn.ac.uk).

Telephone +44 (0)1224 437906.

Fax +44 (0)1224 437971.

Drew McMichael, Medical Student, University of Aberdeen, UK

Daniel Powell, Aberdeen Health Psychology Group, Institute of Applied Health Sciences, University of Aberdeen, Aberdeen, UK; Rowett Institute, University of Aberdeen, Aberdeen, UK

Peter Murchie. Academic Primary Care, Institute of Applied Health Sciences, University of Aberdeen, UK.

**Word Count** = 4,717

## Abstract

**Objectives:** To review the nature and scope of apps targeting individuals living with and beyond cancer.

**Design:** Scoping review, searching the two largest app stores, Google Play, and Apple's App store. App descriptions were exported verbatim, and summarised descriptively, thematically, and by content coding.

**Results:** We included 151 apps targeting individuals living with and beyond cancer. Most targeted all cancer types (n=89, 58.9%) or breast cancer (n=22, 14.6%), and originated in the USA (n=68, 45.0%). The country of origin was unclear for 31 (20.5%) apps. Most apps were developed by commercial companies/private individuals (n=64, 43%) or non-profit organisations (n=30, 19.9%) and marketed apps in terms of fighting metaphors, navigating a journey, and becoming empowered to take control.

App content could be summarised under five main categories: 1. Imparting information about cancer 2. Planning and organising cancer care 3. Interacting with others (including others affected by cancer, and healthcare professionals) 4. Enacting management strategies, and adjusting to life with or beyond cancer 5. Getting feedback about cancer management, for example, by sharing self-monitoring reports with professionals. We found some apps describing "cures" for cancer, or selling products such as alkaline waters to cancer survivors.

**Conclusions:** Apps are currently available via online stores that cover a large spectrum of cancer survivorship activities. The effects of such apps on clinical consultations, patient work/burden, and clinical outcomes merit further attention. Most apps are developed by commercial organisations, and promises of empowerment in the "fight" against cancer are tempered by the potential for exaggerated claims and exploitation.

**Keywords:** Cancer, Mobile Applications, Telemedicine, Cancer Survivor

## Article Summary

### Strengths and Limitations of this study

- Scoping review categorising and summarising a wide range of apps available for cancer survivors on on-line stores
- Content and thematic analysis based on verbatim descriptions from the stores
- Individual apps not downloaded or quality assessed

### Introduction

The number of individuals living with and beyond cancer (also known as cancer survivors) is increasing (1,2). In the United Kingdom, it is estimated that the number of cancer survivors will grow by approximately one million every decade, from 2.1 million in 2010 to 5.3 million in 2040 (2). Cancer is increasingly being regarded as a chronic disease due to the growing number of individuals who are living with cancer, or surviving cancer (3) with long-term symptoms (4) and late effects of cancer treatment (5). Cancer survivors can experience increased physical, psychological, and social issues after their diagnosis, (6) accompanied by a range of unmet needs (7). There is growing political and clinical interest in utilising digital technologies to deliver efficient, high quality care for cancer survivors (8) and to empower patients to perform self-management activities (9).

The market for apps, including health apps is growing rapidly (10,11) with an estimated 318,000 health apps available in 2017(12). It is estimated that over 200 health apps are added daily to app stores (13). Against this changing technological environment, attempts to summarise and evaluate healthcare apps in traditional systematic reviews are limited by the relatively small proportion of technologies which are reported in published literature (14,15). An alternative strategy has been to identify and review apps that are available for download via on-line stores (16–18) .

1  
2  
3 In 2012, Bender et al searched online stores to characterise the purpose and content of apps  
4 focusing on any aspect of cancer (19). Of 295 cancer apps, most were limited in their scope,  
5 focusing primarily on providing information and raising awareness about cancer in general,  
6 and promoting/fundraising for charities (19). In 2014, Kassianos et al searched on-line stores  
7 for melanoma detection apps, identifying 39 apps. Most gave education or advice about  
8 melanoma, ultraviolet radiation exposure, and skin self-examination strategies (20).  
9  
10  
11  
12  
13  
14  
15  
16

17 Relatively little is known about apps targeting people living with and beyond cancer. Dahlke  
18 et al conducted a review to identify behaviour change techniques (21) (BCTs) embedded in  
19 cancer survivorship apps, searching app stores in November 2013 (22). Eighteen BCTs were  
20 present across 65 apps, including providing instruction, tailoring (for example, adjusting the  
21 information delivered based on user input), personalisation (for example, the user can select  
22 elements specific to them such as disease type), and prompting intention formation. What  
23 was less clear were the range of behaviours targeted, the aims and scope of the apps, how the  
24 BCTs were operationalised and organised, and where the technology itself might add value to  
25 survivorship care.  
26  
27  
28  
29  
30  
31  
32  
33  
34  
35  
36  
37  
38

39 The aim of this review is to characterise apps targeting individuals living with and beyond  
40 cancer that are currently available for download via the two major app stores (Google Play  
41 and Apple's App Store), which have been estimated to contain over ninety percent of all apps  
42 (20). The review will provide a summary of the apps' advertised components, stated aims,  
43 and technological features. We aim to categorise and organise the apps such that clinicians,  
44 app developers, and policy makers can make sense of the current international app market for  
45 people living with and beyond cancer.  
46  
47  
48  
49  
50  
51  
52  
53  
54  
55  
56  
57  
58  
59  
60

## Methods

We performed a scoping review,(23) searching Apple’s App Store and Google Play to identify apps targeting people living with and beyond cancer, and used content analysis (24) to characterise advertised content. Scoping reviews differ from traditional systematic reviews in that they map a topic in order to communicate the breadth and depth of the field,(25) and do not tend to involve formal quality assessment of the evidence (23). They describe the “extent, range, and nature” (23) of the available evidence, and set it in context in terms of current understanding. Scoping reviews require analytical interpretation of the subject area (26). They are particularly useful when synthesis involves non-research material,(26) and for emerging areas of research.

In this scoping review, we did not download and interact with the apps or test quality or functionality. In a previous review, Kassianos et al used app store summaries and were able to yield detailed descriptions of melanoma app content (20). Based on older reviews,(19,22) we expected to find a large number of apps, and in this rapidly changing field, the time required to interact with each app would lead to significant delays in communicating our findings. We wished to include paid apps, and had limited resources to buy individual apps for multiple authors. We also wished to include any apps affiliated with specific centres or clinical trials which would require log in credentials.

### Search strategy

Initial searches were conducted by two authors, DM and RA, who refined the search criteria. The lead author then searched the two leading app stores, Apple’s App store (we used an iPhone with iOS operating system), and Android’s Google Play (we used a PC with Windows operating system) in September 2018 using the keywords “cancer”, “cancer survivor”, and “cancer survivorship”.

### Inclusion and exclusion criteria

We included: apps aimed at patients living with and beyond cancer; free and paid apps from any country; apps that included pre-diagnosis support and information (so long as they also specifically targeted individuals living with and beyond cancer); and apps covering more than one clinical condition, so long as cancer was a named condition.

We excluded: apps unavailable in English or without English descriptions; simple awareness raising or pre-diagnosis apps (apps raising awareness of symptoms that were potentially indicative of cancer or risk assessment tools, skin/mole checking apps for individuals without a diagnosis of skin cancer, simple factsheets about a certain cancer type, or glossaries); and recipe and diet apps that were not specifically targeting patients living with and beyond cancer.

Apple's App store operates a "continuous scroll" function, meaning that the store loads content continuously to return results. General search terms or keywords (e.g. "cancer") can result in "endless scrolling" or "infinite scrolling", where results are continuously returned without an apparent end point. Our initial scoping searches showed that apps became much less relevant after the first few hundred results, and we decided to limit our search of Apple's App store to the first 500 results for the term "cancer". The online stores are not set up to allow search results to be exported, and decisions about inclusion and exclusion were made by a single author (RA). Eligibility was determined from the descriptions of the apps within the app stores. Descriptions of the final apps selected for inclusion were reviewed by a second author (DM) to ensure that apps met the eligibility criteria.

### Data extraction and synthesis

A data extraction form was created in Microsoft Excel and two researchers (RA and DM) independently extracted data from all apps that met the inclusion criteria. Data were obtained



1  
2  
3 from the stores' on-line app descriptions, principally the narrative text, but notes were also  
4 taken based upon screenshots of the apps within the store. These notes were added to  
5  
6 summarise any visible content from the screenshots which was in image form but not directly  
7  
8 mentioned in the app description. Verbatim text from the screenshots was imported where  
9  
10 available. We searched for and visited developer websites when available in order to gather  
11  
12 background information on the app, particularly with respect to the nature of the organisation  
13  
14 involved in app development (e.g. non-profit organisation or charity, commercial, academic)  
15  
16 and country of origin.  
17  
18  
19  
20  
21

22 Data were extracted on: cancer type(s); name of owner and/or developer (sometimes the  
23  
24 same); country of origin; operating system (Apple/Android/both); fee to download; type of  
25  
26 owner (charity, commercial, academic institution, healthcare provider, combination); number  
27  
28 of downloads (available on Google Play only); star rating and the presence/absence of a  
29  
30 statement about clinical or scientific input into app development. Data on number of  
31  
32 downloads, and star ratings were extracted by the lead author alone, as this was judged to be  
33  
34 a changing parameter. Data were imported into SPSS version 24, and descriptive statistics  
35  
36 were calculated.  
37  
38  
39  
40

41 The text description of the app given in the online store was copied verbatim and imported  
42  
43 into Microsoft Word. We used content analysis (24) and thematic analysis (27) to organise,  
44  
45 categorise, and synthesise qualitative data. App descriptions and accompanying notes were  
46  
47 imported into NVivo version 11. Data familiarisation took place by reading and re-reading  
48  
49 app descriptions. Initial codes were generated by the lead author in order to organise the data  
50  
51 into meaningful groups and these were discussed with a second author (DP) (28) Codes were  
52  
53 sorted into categories, based on how the codes were related and linked. Each app was then  
54  
55 analysed independently by two reviewers (RA and DM) to categorise the advertised content.  
56  
57  
58 The reviewers were alert to any content which did not fit the categories. We also analysed  
59  
60

1  
2  
3 themes within the language used to describe the apps. Reviewers met after the data  
4  
5  
6 categorisation exercise and compared results, reaching consensus by discussion.  
7

### 8 Patient and Public Involvement

9  
10  
11 We did not involve patients or the public in this scoping review, but rather plan to use the  
12  
13  
14 results to inform technology co-design projects which involve patients and the public.  
15

### 16 **Results**

17  
18  
19 We screened 1265 apps and included 151 in our final synthesis (see flow chart, Figure 1).  
20  
21  
22 The main reasons for exclusion were apps not specifically targeting cancer survivors, only  
23  
24 targeting clinicians, or not relating to cancer. Four apps (*Cancer Stage IV Cure Methodology*,  
25  
26 *Driver*, *Inspire*, and *NIH Breast Cancer Information*) became unavailable during our data  
27  
28 analysis process between 8<sup>th</sup> September 2018 and 24<sup>th</sup> May 2019, and were excluded because  
29  
30 we were unable to return to the on-line descriptions to check accuracy during dual data  
31  
32 extraction.  
33

34  
35  
36 A full list of included apps, data on star ratings, and the raw data used in our analyses are  
37  
38 included as a supplementary data file. App names will be reported in Italics throughout our  
39  
40 results.  
41

### 42 **App demographics**

43  
44  
45 Characteristics of the apps are provided in Table 1. Of note, most of the apps covered all  
46  
47 cancer types (n = 89, 58.9%) or were specific to breast cancer (n = 22, 14.6%). Over 90  
48  
49 percent were free to download. Apps were developed by a mix of private  
50  
51 companies/individuals (n = 64, 43%), charity/non-profit organisations (n = 30, 19.9%),  
52  
53 healthcare organisations (n = 15, 9.9%) and academic institutions (n = 8, 5.3%). We found  
54  
55 apps sharing the same developer and with similar content, but differing by cancer type: Eight  
56  
57 apps were developed by “@point of care”, and five apps developed by “Self-care catalysts”,  
58  
59  
60

1  
2  
3 both commercial developers based in the USA. The nature of the developer could not be  
4  
5 determined for 16 apps (10.6%).  
6  
7  
8  
9  
10  
11  
12  
13  
14  
15  
16  
17  
18  
19  
20  
21  
22  
23  
24  
25  
26  
27  
28  
29  
30  
31  
32  
33  
34  
35  
36  
37  
38  
39  
40  
41  
42  
43  
44  
45  
46  
47  
48  
49  
50  
51  
52  
53  
54  
55  
56  
57  
58  
59  
60

For peer review only

**Table 1: Description of apps targeting individuals living with and beyond cancer available on Apple's App Store and Google Play**

| <b>Cancer Types Covered</b>                                             | <b>Number (N)<br/>(all apps,<br/>N=151 N (%)</b> | <b>Unique<br/>to Apple<br/>N=47,<br/>N (%)</b> | <b>Unique<br/>to Google<br/>N=38<br/>N (%)</b> |
|-------------------------------------------------------------------------|--------------------------------------------------|------------------------------------------------|------------------------------------------------|
| All cancers                                                             | 89 (58.9)                                        | 23 (48.9)                                      | 24 (63.2)                                      |
| Breast                                                                  | 22 (14.6)                                        | 9 (19.1)                                       | 5 (13.2)                                       |
| Prostate                                                                | 9 (6.0)                                          | 5 (10.6)                                       | 2 (5.3)                                        |
| Lung or mesothelioma                                                    | 5 (3.3)                                          | 2 (4.3)                                        | 2 (5.2)                                        |
| Bladder or renal                                                        | 5 (3.3)                                          | 3 (6.4)                                        | 1 (2.6)                                        |
| Liver and/or pancreas                                                   | 3 (2.0)                                          | 3 (6.4)                                        | 0 (0.0)                                        |
| Haematological                                                          | 3 (2.0)                                          | 0 (0.0)                                        | 1 (2.6)                                        |
| Retinoblastoma, eye, or childhood cancers                               | 3 (2.0)                                          | 0 (0.0)                                        | 1 (2.6)                                        |
| Colorectal                                                              | 2 (1.3)                                          | 0 (0.0)                                        | 0 (0.0)                                        |
| Melanoma                                                                | 2 (1.3)                                          | 1 (2.1)                                        | 0 (0.0)                                        |
| Multiple cancers (breast and ovarian, breast, prostate, and colorectal) | 2(1.3)                                           | 0 (0.0)                                        | 0 (0.0)                                        |
| Head and neck or oral                                                   | 2 (1.3)                                          | 1 (2.1)                                        | 1 (2.6)                                        |
| Others (testicular, ovarian, soft tissue sarcoma, carcinoid)            | 4 (2.6)                                          | 0 (0.0)                                        | 1 (2.6)                                        |
| <b>Type of Developer</b>                                                | <b>N (%)</b>                                     | <b>N (%)</b>                                   | <b>N (%)</b>                                   |
| Commercial or private organisation                                      | 65 (43.0)                                        | 23 (48.9)                                      | 20 (52.6)                                      |
| Charity or non-profit organisation                                      | 30 (19.9)                                        | 12 (25.5)                                      | 1 (2.6)                                        |
| Unclear                                                                 | 16 (10.6)                                        | 2 (4.3)                                        | 11 (28.9)                                      |
| Healthcare organisation                                                 | 15 (9.9)                                         | 7 (14.9)                                       | 3 (7.9)                                        |
| Academic organisation                                                   | 8 (5.3)                                          | 2 (4.3)                                        | 2 (5.3)                                        |
| Clinical or research societies/networks or government                   | 4 (2.7)                                          | 0 (0.0)                                        | 0 (0.0)                                        |
| Partnership of various types of organisation                            | 13 (8.6)                                         | 1 (2.1)                                        | 1 (2.6)                                        |
| <b>Country of Origin</b>                                                | <b>N (%)</b>                                     | <b>N (%)</b>                                   | <b>N (%)</b>                                   |
| USA                                                                     | 68 (45.0)                                        | 25 (53.2)                                      | 5 (13.2)                                       |
| Unclear                                                                 | 31 (20.5)                                        | 7 (14.9)                                       | 17 (44.8)                                      |
| UK, Ireland, or Gibraltar                                               | 15 (9.9)                                         | 8 (17.0)                                       | 1 (2.6)                                        |
| Multinational                                                           | 7 (4.6)                                          | 2 (4.3)                                        | 1 (2.6)                                        |
| India                                                                   | 7 (4.6)                                          | 0 (0.0)                                        | 5 (13.2)                                       |
| Canada                                                                  | 5 (3.3)                                          | 0 (0.0)                                        | 2 (5.3)                                        |
| Malaysia or Singapore                                                   | 5 (3.3)                                          | 1 (2.1)                                        | 3 (7.9)                                        |
| Australia                                                               | 4 (2.6)                                          | 2 (4.3)                                        | 0 (0.0)                                        |
| The Netherlands                                                         | 3 (2.0)                                          | 1 (2.1)                                        | 1 (2.6)                                        |
| Others (France, Germany, Hungary, Morocco, Pacific Islands, Spain)      | 6 (4.0)                                          | 1 (2.1)                                        | 3 (7.9)                                        |
| <b>Number of Downloads (Google Play data only for 104 apps)</b>         | <b>N (%)</b>                                     |                                                | <b>N (%)</b>                                   |
| <100                                                                    | 45 (43.3)                                        |                                                | 17 (44.7)                                      |
| 100-500                                                                 | 24 (23.1)                                        |                                                | 10 (26.3)                                      |
| 500-1000                                                                | 9 (8.7)                                          |                                                | 4 (10.5)                                       |
| 1000-5000                                                               | 17 (16.3)                                        |                                                | 4 (10.5)                                       |
| 5000-10,000                                                             | 3 (2.9)                                          |                                                | 1 (2.6)                                        |
| 10,000-50,000                                                           | 5 (4.9)                                          |                                                | 2 (5.3)                                        |
| >50,000                                                                 | 1 (0.9)                                          |                                                | 0 (0.0)                                        |
| <b>Price to download (£ Sterling)</b>                                   | <b>N (%)</b>                                     | <b>N (%)</b>                                   | <b>N (%)</b>                                   |
| Free                                                                    | 140 (92.7)                                       | 46 (97.9)                                      | 34 (89.5)                                      |
| <£9.49 Google Play/ <£12.99 App store                                   | 9 (6.0)                                          | 1 (2.1)                                        | 2 (5.3)                                        |
| >£12.99                                                                 | 2 (1.3)                                          | 0                                              | 2 (5.3)                                        |

1  
2  
3 Unlike Apple's App store, Google Play provides statistics for the number of app downloads.  
4  
5 Of the 104 apps available on Google Play, 45 apps (43.3%) had been downloaded less than  
6  
7 100 times. Five apps ( *Cancer.net mobile*, *MD Anderson mobile*, *Cancer fighting food*,  
8  
9 *Cancer Curing foods*, and *My Cancer Coach*) had between 10,000 and 50,000 downloads.  
10  
11 One app, *Belong Life*, had over 50,000 downloads. *Belong Life* markets itself as an  
12  
13 "information sharing platform", featuring an on-line social network of individuals with  
14  
15 cancer, healthcare professionals who answer questions, access to personalised information,  
16  
17 and a clinical trial matching service.  
18  
19  
20  
21  
22

### 23 **Themes within on-line descriptions of the apps**

24  
25 Verbatim app descriptions and text from screenshots ran to over 30,000 words. Three  
26  
27 prominent themes were: Fighting for Life, Navigating a Journey, and Being Empowered to  
28  
29 Take Control. Examples of app descriptions fitting these themes, with quotations, are  
30  
31 included in Table 2. Fighting metaphors were observed within a range of apps and were  
32  
33 sometimes contained within the app title (e.g. *Attack Cancer using Hypnosis & Guided*  
34  
35 *Imagery/Meditation*, *Cancer Defeated*, and *Cancer Fighting Foods*). In fighting metaphors,  
36  
37 cancer was depicted as an enemy invader and surviving cancer as a battle. Metaphors about  
38  
39 fighting and battles were prominent in apps promoting healthy eating or specific "cancer-  
40  
41 fighting" foods or diets.  
42  
43  
44  
45

46  
47 Cancer was often compared to a journey and apps marketed themselves as tools to help  
48  
49 navigate that journey. Apps that incorporated social networking often emphasised that the  
50  
51 cancer journey did not have to be navigated alone. Social networking was suggested as a  
52  
53 source of knowledge and emotional support. Many apps promoted peer comparison, and  
54  
55 emphasised that others around the world were facing very similar problems, with some apps  
56  
57 referring to "others like you". There was a sense within language used that cancer was  
58  
59 associated with loss of control, and that downloading and interacting with an app was a  
60

method of empowerment and taking back control. Apps were marketed to individuals as a method of becoming actively involved in self-management.

Table 2: Themes present within app marketing statements with example quotations

| Theme                           | Example app (name in <i>Italics</i> ) with quotations from on-line app store                                                                                                                                                                                                                                                                                                                             |
|---------------------------------|----------------------------------------------------------------------------------------------------------------------------------------------------------------------------------------------------------------------------------------------------------------------------------------------------------------------------------------------------------------------------------------------------------|
| Fighting for life               | <p><i>Twist out cancer</i> : “[get to] know other cancer survivors who fought with odds and kicked cancer in the butt!”</p> <p>“<i>Whip cancer</i> provides people with the power to instantly and accurately picture the cancer cells they want to expel from their bodies... <i>Whip Cancer</i> is a powerful tool to help you become relaxed and thus feel empowered while battling your cancer.”</p> |
| Navigating a journey            | <p><i>Breast Cancer healthline</i>: “You’re not on this journey alone. Are you facing a diagnosis? Already in treatment? Remission? We’ll connect you with people just like you, at the same stage in the journey”.</p> <p>“The <i>BigC-Connect</i> platform has been designed to help survivors of cancer on their journey to survival.”</p>                                                            |
| Being empowered to take control | <p>“Hearing that you have been diagnosed with breast cancer can turn your world upside down. The <i>OWise breast cancer</i> app can help you regain control during the chaotic times of illness and treatments”</p> <p>“<i>Blood Cancer Storylines</i> is filled with great tools to help you take control of your health.”</p>                                                                          |

### Content analysis

The apps offered content that could be summarised under five main categories: (1) Imparting Information about Cancer; (2) Planning and Organising Cancer Care; (3) Interacting with Others (including others affected by cancer, and healthcare professionals); (4) Enacting Management Strategies, and Adjusting to Life With or Beyond Cancer; and (5) Getting Feedback about Cancer Management. The specific app features that support each of these activities are summarised in Table 3 and discussed below.

**Table 3: Advertised app functions that support cancer survivorship activities**

| Survivorship activity                               | App feature                                                                                                                                                                                        | Number (%) apps which advertised this feature |
|-----------------------------------------------------|----------------------------------------------------------------------------------------------------------------------------------------------------------------------------------------------------|-----------------------------------------------|
| <b>Imparting information about cancer</b>           | Delivers information about the nature of cancer, cancer terminology, treatment approaches, and services. Apps present information as text, news feeds/updates, videos, and question/answer formats | 81 (53.6%)                                    |
|                                                     | Gives dietary and/or exercise advice, targeting individuals living with and beyond cancer                                                                                                          | 15 (9.9%)                                     |
| <b>Planning and organising cancer care</b>          | Upload and store personal records e.g. diaries/journals, results                                                                                                                                   | 25 (16.6%)                                    |
|                                                     | Keep a list of medications +/- their scheduling                                                                                                                                                    | 20 (13.3%)                                    |
|                                                     | Share uploaded personal records with others                                                                                                                                                        | 8 (5.3%)                                      |
|                                                     | Keep a calendar of appointments                                                                                                                                                                    | 12 (8.0%)                                     |
|                                                     | Login to view or change clinical appointments                                                                                                                                                      | 4 (2.7%)                                      |
|                                                     | Login to remotely access clinical records or results                                                                                                                                               | 3 (2.0%)                                      |
|                                                     | Create or view survivorship care plan                                                                                                                                                              | 2 (1.3%)                                      |
|                                                     | Lists available clinical trials                                                                                                                                                                    | 9 (6.0%)                                      |
| <b>Interacting with others</b>                      | Clinical trials matching                                                                                                                                                                           | 1 (0.7%)                                      |
|                                                     | Access to an on-line cancer community or social network (Four offered a matching service)                                                                                                          | 25 (16.6%)                                    |
|                                                     | List of local (geographically limited) sources of peer support                                                                                                                                     | 11 (7.3%)                                     |
|                                                     | Message a linked healthcare professional                                                                                                                                                           | 4 (2.7%)                                      |
| <b>Enacting management strategies and adjusting</b> | Ask a professional within an online community                                                                                                                                                      | 3 (2.0%)                                      |
|                                                     | Track and record specific symptoms or physiological parameters                                                                                                                                     | 29 (19.2%)                                    |
|                                                     | Provides symptom management tips and advice                                                                                                                                                        | 5 (3.3%)                                      |
|                                                     | Set alarms as reminders to take medication                                                                                                                                                         | 14 (9.3%)                                     |
|                                                     | Track fitness or diet (four apps offered integration with wearable fitness trackers)                                                                                                               | 5 (3.2%)                                      |
|                                                     | Delivers instructions on complementary and/or alternative therapies                                                                                                                                | 12 (7.9%)                                     |
| <b>Getting feedback about cancer management</b>     | Delivers psychological therapies                                                                                                                                                                   | 3 (2.0%)                                      |
|                                                     | Offers spiritual support e.g. bible verses, prayers                                                                                                                                                | 2 (1.4%)                                      |
|                                                     | Generates graphical summaries of self-monitoring data for personal reflection and sharing with others (particularly clinicians)                                                                    | 21 (13.9%)                                    |
|                                                     | Generates or supports creation of question prompt lists (intended to be used during medical encounters)                                                                                            | 13 (8.6%)                                     |
|                                                     | Allows video or audio-recording of medical consultations                                                                                                                                           | 4 (2.7%)                                      |

### Imparting Information about Cancer

Over half the apps (n=81, 53.6%) stated in their description that they provided information or educational materials about cancer; for example, the nature of cancer, aspects of terminology related to cancer, and cancer treatments. The apps presented this in various ways, including

1  
2  
3 fact-sheets/written information, news feeds and updates, questions and answers, and videos.  
4  
5 Some apps (e.g. *Breast Cancer Ally*) provided personalised information based on user-  
6  
7 reported characteristics, including treatments received or disease subtype. One app,  
8  
9 *Personalized Sarcoma Care*, offered prognostic information to users with high-grade soft  
10  
11 tissue sarcoma of the limb who were going to be treated with surgery and radiotherapy. The  
12  
13 app offered a disclaimer that it was not a medical device, not meant to be used to inform  
14  
15 clinical decisions, and not tested for clinical usefulness. Users were instructed to discuss  
16  
17 prognostic results with their physician.  
18  
19  
20  
21

### 22 Planning and Organising Cancer Care

23  
24  
25 Twenty-five apps (16.6%) allowed users to enter and store records relating to their cancer  
26  
27 care, such as results or diaries of treatments they had received. Apps also allowed users to  
28  
29 keep a calendar of appointments (n=12, 8.0%) and to keep lists and scheduling of  
30  
31 medications (n=20, 13.3%). Three apps (*MD Andersen Mobile*, *MyMSK*, and *NED*) allowed  
32  
33 registered users linked to the specific cancer centre to log in and view some of their own  
34  
35 results. Four apps (*MD Andersen Mobile*, *MyMSK*, *CanHOPE cancer support* and  
36  
37 *Pratheeksha*) allowed registered patients to view or change appointments.  
38  
39  
40  
41

42  
43 Nine apps listed cancer clinical trials that may be relevant to individuals living with cancer,  
44  
45 and one (*Belong Life*) offered a clinical trials matching service based on parameters entered  
46  
47 by the user. Two apps supported survivorship care plans (SCPs). *My Care Plan* suggested  
48  
49 that users should input data to create their own SCP, and then complete it with their  
50  
51 oncologist. The *Survivor Care* app allowed registered patients with testicular cancer to use  
52  
53 the app to read a QR code (quick response code, or matrix bar code), generated by their  
54  
55 specialist, that gave them access to a personalised care plan.  
56  
57  
58  
59  
60



### Interacting with Others

Twenty five apps (16.6%) offered access to an on-line community (social network) of other individuals with cancer, promoting these networks as sources of support and information.

Four of these (*Boobytrapp*, *Breast Cancer Health*, *Breast Cancer Social*, and *Cnected*) advertised a matching service in which users could be matched with other users or groups based on characteristics such as cancer type, stage, treatments, and interests.

Apps also offered interaction with healthcare professionals: three apps (*Belong.life*, *Breast Friends app*, and *Cancer Connect*) listed the ability to message or ask questions of professionals who were linked to the app platform. Four apps (Medocity's *iCancer Health*, *MD Andersen Mobile*, *MyMSK*, and *Pratheeksha*) allowed users to login and send messages to their linked care team.

### Enacting Management Strategies, and Adjusting to Life With or Beyond Cancer

Specific aspects of self-management supported by apps include symptom tracking and monitoring; setting alarms or reminders to take medications regularly, tracking and adjusting diet and physical activity levels, utilising psychological and complementary approaches, and knowing when to seek medical attention for chemotherapy side effects.

Twenty-nine apps (19.2%) allowed users to track their symptoms: mainly fatigue, pain, mood changes, nausea, and sleep problems. Some suggested monitoring physical or physiological parameters, including pulse, blood pressure, and weight, and some allowed customisation, letting the user decide which symptoms/parameters to monitor. The recommended frequency of self-monitoring varied, with some promoting weekly input, some apps suggesting on-demand tracking when symptoms were experienced, and others not specifying particular intervals for self-monitoring. Apps utilised a number of rating scales, including touch-screen

1  
2  
3 sliders, and faces rating scales. The data were used to provide graphs and output reports (see  
4  
5 “feedback” below).  
6  
7

8 Fifteen apps (9.9%) gave advice about diet and/or exercise after a cancer diagnosis, with five  
9  
10 allowing users to track their exercise or dietary activities. Four apps offered integration with  
11  
12 wearable fitness trackers.  
13  
14

15  
16 Complementary and alternative therapies were a prominent component of 12 apps (7.9%),  
17  
18 which gave instructions on relaxation techniques, provided “healing” music playlists, and  
19  
20 taught guided imagery, visualisation, meditation, Qigong, and yoga. The *MeTime* app,  
21  
22 developed by University of Michigan, taught acupressure to manage fatigue in breast cancer  
23  
24 survivors, and quoted evidence supporting its use from a randomised controlled trial (29).  
25  
26

27 Three apps (*Emory Awake*, *UNTIRE*, and *Bubble VR*) delivered programmes of psychological  
28  
29 therapy to cancer survivors; for example, *Bubble VR* delivered cognitive behavioural therapy  
30  
31 (CBT), guided imagery, meditation, and mindfulness-based stress reduction (MBSR) within  
32  
33 Virtual Reality. The app was linked to a focus group research study, and registered  
34  
35 participants could use a PIN code to interact with it.  
36  
37  
38

39 Three apps (*CanAdvice+*, *Cancer Emergency Response Tool*, and *For Cancer Care*)  
40  
41 specifically targeted people on chemotherapy, and sought to help users judge when to seek  
42  
43 medical attention for side effects or problems experienced during chemotherapy. *CanAdvice+*  
44  
45 and *Cancer Emergency Response Tool* were linked to UK cancer centres and utilised the  
46  
47 United Kingdom Oncology Nurses Society (UKONS) triage tool (30), whereas *For Cancer*  
48  
49 *Care* offered generic tips and advice to manage chemotherapy side effects.  
50  
51  
52  
53

54 Some apps dealt with changes in body image after cancer, and psychological adjustment to  
55  
56 physical changes. *Inkspiration* app allowed users to “try on” mastectomy tattoos, super-  
57  
58  
59  
60

1  
2  
3 imposing tattoos onto photo uploads. *BECCA – the Breast Cancer Care app* offered beauty  
4 tips alongside other information about breast cancer.  
5  
6  
7

### 8 9 **Getting Feedback about Cancer Management**

10  
11 Twenty one apps (13.9%) allowed users who had tracked symptoms to generate graphical  
12 summaries of their self-monitoring data for personal reflection (usually line graphs showing,  
13 for example, pain levels plotted against date/time), and to generate output reports from the  
14 data, usually by email. A central premise was that users would learn about patterns within  
15 their symptoms, and that sending their symptom reports to professionals could result in action  
16 by the professional to help with symptom management.  
17  
18  
19  
20  
21  
22  
23

24  
25 Apps also attempted to influence clinical encounters between users and their clinicians by  
26 allowing them to generate (sometimes from templates or lists) or store questions that they  
27 would like to ask at the next medical encounter (n=13, 8.6%). Four apps (*Focus on*  
28 *Lymphoma*, *My Cancer Coach*, *Owise Breast Cancer*, and *Pocket Cancer Care Guide –*  
29 *National Coalition for Cancer Survivorship*) allowed users to video- or audio-record their  
30 medical consultations.  
31  
32  
33  
34  
35  
36  
37  
38  
39

### 40 41 **Clinical and/or Scientific Basis for App Content and Apps as Commercial** 42 **Opportunities**

43  
44 Fifty one out of 151 apps (33.8%) cited clinical or scientific/clinical research team input into  
45 the development of the app within the online description. Most of these apps were developed  
46 by recognisable institutions, such as universities, clinics, or charities. However, one app,  
47 *Don't Die 2* retailing at £299.99 on Google Play, had limited information about content, and  
48 stated: "Contains new cancer approach not previously available to cancer victims. All results  
49 obtained after a rigorous 12-year study and when applied to active cancer patients show  
50 dramatic results increasing survival results." The app was developed by a family cancer  
51  
52  
53  
54  
55  
56  
57  
58  
59  
60

1  
2  
3 foundation (MiSong Foundation), and screenshots showed an enquiry form which users could  
4 fill in for further information. Links to the developer website were inactive.  
5  
6  
7

8 We found a number of apps offering purchasable products to cancer survivors and apps that  
9 made claims about offering a potential cancer cure. *Best Prostate Cancer Treatment* opened  
10 its description by stating: “Court Documented Proof That The Cure For Prostate Cancer &  
11 Colon Cancer is real”. Screenshots from the app were captioned with “PROSTATE  
12  
13 CANCER Cure for Cancer Now Available”, and the app offered treatments based on whole-  
14 leaf Aloe Vera. One screenshot showed an “Advanced Package” with products available for  
15 \$750. The app description marketed the product as follows: “The advanced package provides  
16 specific elements to expedite the healing process. This package revitalizes and engages  
17 intercellular advancement and ease in detoxification”. *Cancel Cancer* mentioned links  
18 between body acidity and cancer, and screenshots from the app showed order forms, products  
19 for sale, and videos about Kangen water, an alkaline water.  
20  
21  
22  
23  
24  
25  
26  
27  
28  
29  
30  
31  
32  
33

34 Three apps contained the word “cure” in their title. *Cancer Cure* (retailing on Google for  
35 £28.99) offered “300 alternate healing ideas” and was recommended for “anyone who is  
36 struggling for cancer survival”. *Cancer Curing Foods* (free to download) had been  
37 downloaded more than 10,000 times on Google Play and offered “top ten fruits, vegetables,  
38 and foods that can cure cancer”. *Various Cancer Cures*, offered free via Google Play, listed  
39 information about surgery, chemotherapy, and radiotherapy as treatment options for cancer.  
40  
41  
42  
43  
44  
45  
46  
47  
48

49 *Cancer Wellness* invited users to complete a weekly cancer survey, with links to a private  
50 clinic in the Pacific Islands (<http://cancerwellnessclinic.com/our-treatment-program/>) that  
51 offered alternative cancer treatments and supplements. In *Ways to Fight Off Cancer*, available  
52 on Google Play, the on-line description had statements that included “broccoli cures cancer”  
53 and “tomato cures cancer”... “So What Are you Waiting For !?! Download the "Ways Fight  
54  
55  
56  
57  
58  
59  
60

1  
2  
3 Off Cancer" Now!" Other potentially exaggerated claims were found in apps promoting  
4  
5 complementary therapies and visualisation; for example *Cancer Fighting App* stated (sic.)  
6  
7 "After working on visualization for few weeks, the cancer tumor had shrunk to small its size  
8  
9 and its continuous become smaller and smaller. Imagination and visualization for creating  
10  
11 radiant, lifelong health and happiness."  
12  
13

## 14 15 16 **Discussion**

### 17 18 Main findings

19  
20 We reviewed 151 apps targeting individuals living with and or beyond cancer, available for  
21  
22 download via on-line stores. The apps are often marketed in terms of fighting cancer, taking a  
23  
24 journey, and taking control. Apps are heterogeneous in terms of aims and scope, but typical  
25  
26 content includes informational resources, diary functions, access to on-line social  
27  
28 networks/communities, and symptom-tracking capabilities linked to graphical outputs.  
29  
30

31  
32 App owners came from a range of backgrounds (e.g. non-profit organisations, academic  
33  
34 institutions, healthcare providers), but most publicly available apps had been developed by  
35  
36 commercial or private organisations. We were unable to discern the nature of the developer in  
37  
38 16 apps, despite visiting linked websites. We also found some apps that seemed to make  
39  
40 exaggerated claims, for example, about foods that cure cancer, visualisation regimes that  
41  
42 shrink tumours (see examples above), and apps that marketed or sold products with  
43  
44 questionable efficacy (e.g. Kangen water or Aloe Vera extract).  
45  
46  
47  
48  
49

### 50 Comparison with existing literature, and implications for practice, policy, and research

51  
52 Violence and journey metaphors are known to be widely used in the context of cancer and  
53  
54 cancer fundraising campaigns, and have sparked debate.<sup>(31)</sup> Both violence and journey  
55  
56 metaphors can be perceived in both positive, and in disempowering ways. We found these  
57  
58 metaphors to be prominent in on-line app marketing.  
59  
60

1  
2  
3 Apps cover some of the areas that are recommended in clinical guidelines for cancer  
4 survivorship care (32), such as information provision; making lifestyle changes (particularly  
5 diet and exercise), dealing with physical and psychosocial effects of cancer and its treatment,  
6 and providing survivorship care plans. The potential usefulness of reputable apps may be  
7 undermined by the fact that they appear in stores alongside those that are potentially  
8 exploitative.  
9

10  
11 Guidelines and regulatory procedures for health apps have been introduced in the UK (33,34)  
12 and the USA (35), but these mainly apply to apps classed as medical devices (used to  
13 diagnose, support diagnosis or clinical decision making, or make calculations to determine  
14 diagnosis or treatment), which are considered to carry the highest risks. Apps that provide  
15 education, monitor health or well-being, and store or transmit data without change are not  
16 subject to the same regulatory procedures.(34) These types of apps can be developed quickly  
17 by anyone who wishes to (36), without specific regulatory requirements.  
18  
19

20  
21 There is increasing recognition that lack of public trust is a major barrier to the successful  
22 utilisation of data and technology to improve patient outcomes.(37) In a recent review, Wyatt  
23 discussed problems with health apps, including privacy issues, poor quality content, and  
24 variable accuracy, for example, in diagnosing melanoma (38). In our review, most apps were  
25 free, and it was beyond the scope of this review to determine how apps attracted revenue.  
26 Potential sources include advertising, in-app purchases, and data “harvesting”. There is  
27 increasing evidence that sharing of user data is routine in medical apps (39) and that data  
28 harvesting for targeted advertising is an important source of revenue for many app  
29 developers.(38)  
30  
31

32  
33 Questions remain about the clinical role of cancer apps, how they affect formal medical care  
34 and influence clinical outcomes. Some of the apps we reviewed helped users to generate lists  
35  
36  
37  
38  
39  
40  
41  
42  
43  
44  
45  
46  
47  
48  
49  
50  
51  
52  
53  
54  
55  
56  
57  
58  
59  
60

1  
2  
3 of questions that could be taken to appointments or facilitated video or audio-recording of  
4 consultations. Formal trials of this type of approach have shown promise in the oncology  
5 setting, with respect to improving patients' information needs, their satisfaction with patient-  
6 professional communication, and recall of information (40–42). Whether these findings can be  
7 extrapolated to specific apps is unclear.  
8  
9

10  
11  
12  
13  
14  
15 Many of the apps we reviewed attempted to influence medical care by suggesting that self-  
16 monitoring reports be shared with clinicians. Patient reported outcome monitoring has been  
17 shown to improve patient satisfaction with care in the oncology setting, and to increase the  
18 number of patient outcomes that are discussed during consultations.(26,27). However, any  
19 effects are likely to be contingent on how the data are used during clinical encounters and  
20 what data are collected.(43) Scientific trials tend to use validated questionnaires, as opposed  
21 to the, often generic, tools present within apps.  
22  
23  
24  
25  
26  
27  
28  
29  
30  
31

32 There seems to be a widely held assumption in symptom management apps that providing  
33 patients with simple graphical summaries of their self-reported symptom data will afford  
34 insights that could improve symptom management. Conversely, there is a danger that apps  
35 could increase the work and burden of cancer survivorship activities without resultant  
36 benefits to the user. We noted close parallels between categories of app content (Table 3),  
37 and models of treatment burden in other chronic conditions.(29–31).  
38  
39  
40  
41  
42  
43  
44  
45

46 The app market is a potentially challenging environment for patients and clinicians to  
47 navigate in terms of judging app quality, effectiveness, clinical utility, and data privacy. It  
48 may be that app stores themselves should be asked to take more responsibility for the content  
49 of the apps they offer. Several high-profile scandals, for example, Cambridge Analytica  
50 allegedly using Facebook data to influence election results,(44) and suicides potentially  
51 linked to social media use(45), have led to increased public scrutiny surrounding the social  
52  
53  
54  
55  
56  
57  
58  
59  
60

responsibilities of technology providers. With respect to app stores, existing legislation, such as trading standards regulations that prevent false or misleading advertising, and General Data Protection Regulation (GDPR) might be enforced to protect consumers. The NHS has also started a library of approved apps that have been screened against quality criteria (46). Three of the apps reviewed here, *BECCA – the Breast Cancer Care app*, *OWISE breast cancer*, and *Untire: Beating cancer fatigue*, appear in the library.

While app stores continue to offer low quality and potentially exploitative apps, we propose a rudimentary check-list (Text box one), the “Four D’s”, which might be used by patients before downloading a health app. The checklist was derived pragmatically, based on our experiences of conducting this review, and on the existing literature/guidelines discussed above (33,35,38,39).

**Text Box one: Four D’s to discuss with patients if they are considering using a health app**

**Does something useful** – does it solve a problem you are having?

**Design** – are there screenshots that summarise the content and give you an impression of how you would use the app?

**Developer** – do you recognise a credible organisation/source behind the app, and do links to the developer website work?

**Data** – does the app ask you for personal information that you would prefer not to be shared with others or provide a transparent description of how data will be used and shared?

Intuitively, we considered a fifth “D” – Downloads, in which the number of downloads and positive/detailed consumer reviews might serve as an indicator of quality and trustworthiness. Apps by reputable organisations tended to be highly downloaded, but we also found highly



1  
2  
3 downloaded apps which seemed to be of low quality e.g. *Cancer Curing Foods*, offering “top  
4  
5 ten fruits, vegetables, and foods that can cure cancer” had been downloaded over 10,000  
6  
7 times. We also considered that some app reviews could be false or purposefully misleading.  
8  
9  
10 The association between number of downloads and objective measures of quality deserve  
11  
12 further attention.  
13  
14

### 15 Strengths and limitations

16  
17  
18 The app market is changing rapidly – more apps are being added to app stores every day, and  
19  
20 it is also possible for developers to delete apps from on-line stores. We have presented a  
21  
22 snapshot of what was available between September 2018 and May 2019. The main limitation  
23  
24 of this review is that we did not download and interact with individual apps. To have done so  
25  
26 would have added considerable time to the review process (which was time-sensitive, given  
27  
28 the changing nature of the market), and would have also involved buying several apps that  
29  
30 looked to have limited content (e.g. “Don’t die 2” retailed at £299.99). Our content analysis is  
31  
32 based on what was stated in online descriptions, and may underestimate content contained  
33  
34 within the apps. We did not register a review protocol, which is a relatively new requirement  
35  
36 in updated PRISMA guidelines for scoping reviews, which were published after we started  
37  
38 this review (47).  
39  
40  
41  
42  
43

44 App stores are commercial entities and are not searchable in the same way as databases of  
45  
46 published medical literature. We fully expect that other relevant apps exist which have not  
47  
48 been identified by our searches. Furthermore, it is not possible to save or export searches.  
49  
50 Apps are displayed in an order that is determined by on-line stores, and, to the best of our  
51  
52 knowledge, the exact sort algorithms utilised by stores are not in the public domain. This  
53  
54 makes searches difficult to accurately reproduce, and made it difficult to involve two authors  
55  
56 in all stages of the app selection process. Nevertheless, where possible, we have adopted  
57  
58  
59  
60

1  
2  
3 principles of systematic reviewing. We are confident that we have identified apps in a  
4  
5 systematic and unbiased way and have characterised a large spectrum of currently available  
6  
7 apps.  
8  
9

## 10 **Conclusions**

11  
12 Apps exist that cover a large spectrum of cancer survivorship activities: key components are  
13  
14 information provision, storing personal summaries, and self-monitoring. The effects of such  
15  
16 apps on clinical consultations, patient work/burden, and clinical outcomes merit further  
17  
18 attention. Most apps are developed by commercial organisations and promises of  
19  
20 empowerment in the “fight” against cancer are tempered by the potential for exaggerated  
21  
22 claims and exploitation.  
23  
24  
25  
26  
27  
28  
29  
30

31 **Funding:** This work was supported by NHS Grampian Pump Priming funding, grant  
32  
33 reference RG14437-11. DP is supported by the strategic research programme funded by the  
34  
35 Scottish Government’s Rural and Environment Science and Analytical Services Division  
36  
37

38 **Competing Interests:** RA and PM are involved in researching, designing, and developing  
39  
40 apps for people with cancer but have no associations with commercial entities. None of our  
41  
42 apps are available via online stores, or represented within this review. There are no other  
43  
44 competing interests of conflicts to declare.  
45  
46  
47

48 **Contributions:** RA conceptualized this review, designed the review, undertook searches,  
49  
50 assessed the apps for inclusion/exclusion, undertook data extraction, and wrote the paper.  
51  
52

53 DM undertook scoping searches, helped refine the search criteria, checked the final apps  
54  
55 fulfilled inclusion/exclusion criteria, and performed independent dual data extraction and  
56  
57 content coding. He contributed to drafts of the paper, and revising the article critically.  
58  
59  
60

1  
2  
3 DP assisted with thematic analysis, and revising the article critically.  
4  
5

6 PM contributed to drafts of the paper and revising the article critically.  
7  
8

9  
10 **Figure 1: Identification and screening process for apps included in this review**  
11

12 **Data sharing statement**  
13

14 All data relevant to the study are included in the article or uploaded as supplementary  
15  
16 information.  
17  
18  
19  
20  
21  
22  
23  
24  
25  
26  
27  
28  
29  
30  
31  
32  
33  
34  
35  
36  
37  
38  
39  
40  
41  
42  
43  
44  
45  
46  
47  
48  
49  
50  
51  
52  
53  
54  
55  
56  
57  
58  
59  
60

For peer review only

## References

1. National Cancer Institute. Cancer Statistics - National Cancer Institute [Internet]. [cited 2019 Feb 1]. Available from: <https://www.cancer.gov/about-cancer/understanding/statistics>
2. Maddams J, Utley M, Møller H. Projections of cancer prevalence in the United Kingdom, 2010–2040. *Br J Cancer* [Internet]. 2012 Sep 14 [cited 2018 Mar 5];107(7):1195–202. Available from: <http://www.ncbi.nlm.nih.gov/pubmed/22892390>
3. Adam R, Watson E. The role of primary care in supporting patients living with and beyond cancer. *Curr Opin Support Palliat Care* [Internet]. 2018 Jul [cited 2019 Mar 15];12(3):1. Available from: <http://www.ncbi.nlm.nih.gov/pubmed/30074923>
4. Glare PA, Davies PS, Finlay E, Gulati A, Lemanne D, Moryl N, et al. Pain in cancer survivors. *J Clin Oncol* [Internet]. 2014 Jun 1 [cited 2018 Mar 1];32(16):1739–47. Available from: <http://www.ncbi.nlm.nih.gov/pubmed/24799477>
5. Hoekstra RA, Heins MJ, Korevaar JC. Health care needs of cancer survivors in general practice: a systematic review. *BMC Fam Pract* [Internet]. 2014 Dec 13 [cited 2018 Sep 17];15(1):94. Available from: <http://www.ncbi.nlm.nih.gov/pubmed/24885266>
6. Elliott J, Fallows A, Staetsky L, Smith PWF, Foster CL, Maher EJ, et al. The health and well-being of cancer survivors in the UK: findings from a population-based survey. *Br J Cancer* [Internet]. 2011 Nov 8 [cited 2019 Mar 4];105 Suppl 1(Suppl 1):S11-20. Available from: <http://www.ncbi.nlm.nih.gov/pubmed/22048028>
7. Nekhlyudov L, O'malley DM, Hudson S V. Integrating primary care providers in the care of cancer survivors: gaps in evidence and future opportunities. *Lancet Oncol* [Internet]. 2017 Jan 1 [cited 2018 Apr 23];18(1):e30–8. Available from: <http://www.ncbi.nlm.nih.gov/pubmed/28049575>
8. Escriva Bouley G, Leroy T, Bernetière C, Paquenseguy F, Desfriches-Doria O, Préau M. Digital health interventions to help living with cancer: A systematic review of participants' engagement and psychosocial effects. *Psychooncology* [Internet]. 2018 Dec [cited 2019 Mar 4];27(12):2677–86. Available from: <http://www.ncbi.nlm.nih.gov/pubmed/30152074>
9. Groen WG, Kuijpers W, Oldenburg HS, Wouters MW, Aaronson NK, van Harten WH. Empowerment of Cancer Survivors Through Information Technology: An Integrative Review. *J Med Internet Res* [Internet]. 2015 Nov 27 [cited 2019 Mar 4];17(11):e270. Available from: <http://www.ncbi.nlm.nih.gov/pubmed/26614438>
10. Business of Apps. App Download and Usage Statistics (2018) - Business of Apps [Internet]. 2018 [cited 2019 Feb 14]. Available from: <http://www.businessofapps.com/data/app-statistics/>
11. Burki TK. Cancer apps. *Lancet Oncol* [Internet]. 2013 Jun [cited 2019 Mar 4];14(7):580–1. Available from: <https://linkinghub.elsevier.com/retrieve/pii/S1470204513702596>
12. IQVIA Institute for Human Data Science. The Growing Value of Digital Health - IQVIA [Internet]. [cited 2019 Aug 19]. Available from: <https://www.iqvia.com/institute/reports/the-growing-value-of-digital-health>

- 1  
2  
3 13. The Rise of mHealth Apps: A Market Snapshot - Liquid State [Internet]. 2018 [cited  
4 2019 May 29]. Available from: <https://liquid-state.com/mhealth-apps-market-snapshot/>  
5
- 6 14. Cox A, Lucas G, Marcu A, Piano M, Grosvenor W, Mold F, et al. Cancer Survivors'  
7 Experience With Telehealth: A Systematic Review and Thematic Synthesis. *J Med*  
8 *Internet Res* [Internet]. 2017 Jan 9 [cited 2019 Mar 11];19(1):e11. Available from:  
9 <http://www.jmir.org/2017/1/e11/>  
10
- 11 15. Dickinson R, Hall S, Sinclair JE, Bond C, Murchie P. Using technology to deliver  
12 cancer follow-up: a systematic review. *BMC Cancer* [Internet]. 2014 May 3 [cited  
13 2019 Mar 11];14(1):311. Available from:  
14 <http://bmccancer.biomedcentral.com/articles/10.1186/1471-2407-14-311>  
15
- 16 16. Abrams LC, Lee Westmaas J, Bontemps-Jones J, Ramani R, Mellerson J. A content  
17 analysis of popular smartphone apps for smoking cessation. *Am J Prev Med* [Internet].  
18 2013 Dec [cited 2018 Sep 5];45(6):732–6. Available from:  
19 <http://linkinghub.elsevier.com/retrieve/pii/S0749379713004790>  
20
- 21 17. Schoffman DE, Turner-McGrievy G, Jones SJ, Wilcox S. Mobile apps for pediatric  
22 obesity prevention and treatment, healthy eating, and physical activity promotion: just  
23 fun and games? *Transl Behav Med* [Internet]. 2013 Sep 17 [cited 2018 Sep  
24 5];3(3):320–5. Available from: [https://academic.oup.com/tbm/article/3/3/320-](https://academic.oup.com/tbm/article/3/3/320-325/4563017)  
25 [325/4563017](https://academic.oup.com/tbm/article/3/3/320-325/4563017)  
26
- 27 18. Azar KMJ, Lesser LI, Laing BY, Stephens J, Aurora MS, Burke LE, et al. Mobile  
28 applications for weight management: theory-based content analysis. *Am J Prev Med*  
29 [Internet]. 2013 Nov [cited 2018 Sep 5];45(5):583–9. Available from:  
30 <http://linkinghub.elsevier.com/retrieve/pii/S0749379713004315>  
31
- 32 19. Bender JL, Yue RYK, To MJ, Deacken L, Jadad AR. A lot of action, but not in the  
33 right direction: systematic review and content analysis of smartphone applications for  
34 the prevention, detection, and management of cancer. *J Med Internet Res* [Internet].  
35 2013 Dec 23 [cited 2018 Apr 11];15(12):e287. Available from:  
36 <http://www.jmir.org/2013/12/e287/>  
37
- 38 20. Kassianos AP, Emery JD, Murchie P, Walter FM. Smartphone applications for  
39 melanoma detection by community, patient and generalist clinician users: a review. *Br*  
40 *J Dermatol* [Internet]. 2015 Jun [cited 2019 Mar 4];172(6):1507–18. Available from:  
41 <http://doi.wiley.com/10.1111/bjd.13665>  
42
- 43 21. Abraham C, Michie S. A taxonomy of behavior change techniques used in  
44 interventions. *Heal Psychol* [Internet]. 2008 May [cited 2019 May 29];27(3):379–87.  
45 Available from: <http://www.ncbi.nlm.nih.gov/pubmed/18624603>  
46
- 47 22. Vollmer Dahlke D, Fair K, Hong YA, Beaudoin CE, Pulczynski J, Ory MG. Apps  
48 seeking theories: results of a study on the use of health behavior change theories in  
49 cancer survivorship mobile apps. *JMIR mHealth uHealth* [Internet]. 2015 Mar 27  
50 [cited 2019 Feb 14];3(1):e31. Available from: <http://mhealth.jmir.org/2015/1/e31/>  
51
- 52 23. Levac D, Colquhoun H, O'Brien KK. Scoping studies: advancing the methodology.  
53 *Implement Sci* [Internet]. 2010 Dec 20 [cited 2019 May 29];5(1):69. Available from:  
54 <http://implementationscience.biomedcentral.com/articles/10.1186/1748-5908-5-69>  
55
- 56 24. Hsieh H-F, Shannon SE. Three Approaches to Qualitative Content Analysis. *Qual*  
57 *Health Res* [Internet]. 2005 Nov [cited 2019 Mar 22];15(9):1277–88. Available from:  
58  
59  
60

- 1  
2  
3 <http://www.ncbi.nlm.nih.gov/pubmed/16204405>  
4
- 5 25. Arksey H, O'Malley L. Scoping studies: towards a methodological framework. *Int J Soc Res Methodol* [Internet]. 2005 Feb [cited 2019 May 29];8(1):19–32. Available  
6 from: <http://www.tandfonline.com/doi/abs/10.1080/1364557032000119616>  
7  
8
- 9 26. Davis K, Drey N, Gould D. What are scoping studies? A review of the nursing  
10 literature. *Int J Nurs Stud* [Internet]. 2009 Oct [cited 2019 May 29];46(10):1386–400.  
11 Available from: <https://linkinghub.elsevier.com/retrieve/pii/S0020748909000698>  
12
- 13 27. Joffe H, Yardley L. *Research Methods for Clinical and Health Psychology* [Internet].  
14 SAGE Publications; 2004 [cited 2016 Dec 19]. 248 p. Available from:  
15 <https://books.google.com/books?hl=en&lr=&id=SHiUvmKzuFwC&pgis=1>  
16
- 17 28. Methods: Teaching thematic analysis | *The Psychologist* [Internet]. [cited 2017 Feb 8].  
18 Available from: [http://thepsychologist.bps.org.uk/volume-26/edition-2/methods-](http://thepsychologist.bps.org.uk/volume-26/edition-2/methods-teaching-thematic-analysis)  
19 [teaching-thematic-analysis](http://thepsychologist.bps.org.uk/volume-26/edition-2/methods-teaching-thematic-analysis)  
20
- 21 29. Zick SM, Sen A, Wyatt GK, Murphy SL, Arnedt JT, Harris RE. Investigation of 2  
22 Types of Self-administered Acupressure for Persistent Cancer-Related Fatigue in  
23 Breast Cancer Survivors: A Randomized Clinical Trial. *JAMA Oncol* [Internet]. 2016  
24 Nov 1 [cited 2019 Feb 14];2(11):1470–6. Available from:  
25 <http://oncology.jamanetwork.com/article.aspx?doi=10.1001/jamaoncol.2016.1867>  
26  
27
- 28 30. UKONS. UK Oncology Nurses Society Triage Tool [Internet]. [cited 2019 Jun 6].  
29 Available from: <http://necn.nhs.uk/wp-content/uploads/2018/05/UKONS-Tool-.pdf>  
30
- 31 31. UK CR. May I take your metaphor? – how we talk about cancer - Cancer Research UK  
32 - Science blog [Internet]. [cited 2019 Jun 6]. Available from:  
33 [https://scienceblog.cancerresearchuk.org/2015/09/28/may-i-take-your-metaphor-how-](https://scienceblog.cancerresearchuk.org/2015/09/28/may-i-take-your-metaphor-how-we-talk-about-cancer/)  
34 [we-talk-about-cancer/](https://scienceblog.cancerresearchuk.org/2015/09/28/may-i-take-your-metaphor-how-we-talk-about-cancer/)  
35
- 36 32. American Society of Clinical Oncology. Guidelines on Survivorship Care | ASCO  
37 [Internet]. 2014 [cited 2018 Apr 23]. Available from: [https://www.asco.org/practice-](https://www.asco.org/practice-guidelines/cancer-care-initiatives/prevention-survivorship/survivorship-compendium-0)  
38 [guidelines/cancer-care-initiatives/prevention-survivorship/survivorship-compendium-0](https://www.asco.org/practice-guidelines/cancer-care-initiatives/prevention-survivorship/survivorship-compendium-0)  
39
- 40 33. Royal College of Physicians. Using apps in clinical practice guidance | RCP London  
41 [Internet]. 2015 [cited 2019 Apr 18]. Available from:  
42 <https://www.rcplondon.ac.uk/guidelines-policy/using-apps-clinical-practice-guidance>  
43
- 44 34. Medicines & Healthcare products Regulatory Agency. Guidance: Medical device  
45 stand-alone software including apps (including IVDMDs) [Internet]. 2018. Available  
46 from:  
47 [https://assets.publishing.service.gov.uk/government/uploads/system/uploads/attachmen](https://assets.publishing.service.gov.uk/government/uploads/system/uploads/attachment_data/file/717865/Software_flow_chart_Ed_1-05.pdf)  
48 [t\\_data/file/717865/Software\\_flow\\_chart\\_Ed\\_1-05.pdf](https://assets.publishing.service.gov.uk/government/uploads/system/uploads/attachment_data/file/717865/Software_flow_chart_Ed_1-05.pdf)  
49
- 50 35. US Departments of Health and Human Services Food and Drug Administration, Center  
51 for Devices and Radiological Health C for BE and R. Mobile medical applications.  
52 Guidelines for Industry and Food and Drug Administration Staff [Internet]. 2015.  
53 Available from:  
54 [https://www.fda.gov/downloads/MedicalDevices/DeviceRegulationandGuidance/Guid](https://www.fda.gov/downloads/MedicalDevices/DeviceRegulationandGuidance/GuidanceDocuments/UCM263366.pdf)  
55 [anceDocuments/UCM263366.pdf](https://www.fda.gov/downloads/MedicalDevices/DeviceRegulationandGuidance/GuidanceDocuments/UCM263366.pdf)  
56  
57
- 58 36. van Velthoven MH, Wyatt JC, Meinert E, Brindley D, Wells G. How standards and  
59 user involvement can improve app quality: A lifecycle approach. *Int J Med Inform*  
60

- [Internet]. 2018 Oct 1 [cited 2019 Apr 19];118:54–7. Available from: <https://www.sciencedirect.com/science/article/pii/S1386505618307160?via%3Dihub>
37. National Information Board UG. Personalised Health and Care 2020. Using Data and Technology to Transform Outcomes for Patients and Citizens [Internet]. 2014. Available from: [https://assets.publishing.service.gov.uk/government/uploads/system/uploads/attachment\\_data/file/384650/NIB\\_Report.pdf](https://assets.publishing.service.gov.uk/government/uploads/system/uploads/attachment_data/file/384650/NIB_Report.pdf)
38. Wyatt JC. How can clinicians, specialty societies and others evaluate and improve the quality of apps for patient use? *BMC Med* [Internet]. 2018 Dec 3 [cited 2019 Apr 18];16(1):225. Available from: <https://bmcmmedicine.biomedcentral.com/articles/10.1186/s12916-018-1211-7>
39. Grundy Q, Chiu K, Held F, Continella A, Bero L, Holz R. Data sharing practices of medicines related apps and the mobile ecosystem: traffic, content, and network analysis. *BMJ* [Internet]. 2019 Mar 20 [cited 2019 Apr 18];364:l920. Available from: <http://www.ncbi.nlm.nih.gov/pubmed/30894349>
40. Wolderslund M, Kofoed P-E, Holst R, Axboe M, Ammentorp J. Digital audio recordings improve the outcomes of patient consultations: A randomised cluster trial. *Patient Educ Couns* [Internet]. 2017 Feb [cited 2019 Apr 18];100(2):242–9. Available from: <http://www.ncbi.nlm.nih.gov/pubmed/27593087>
41. Clayton JM, Butow PN, Tattersall MHN, Devine RJ, Simpson JM, Aggarwal G, et al. Randomized Controlled Trial of a Prompt List to Help Advanced Cancer Patients and Their Caregivers to Ask Questions About Prognosis and End-of-Life Care. *J Clin Oncol* [Internet]. 2007 Feb 9 [cited 2019 Apr 18];25(6):715–23. Available from: <http://www.ncbi.nlm.nih.gov/pubmed/17308275>
42. Amundsen A, Bergvik S, Butow P, Tattersall MHN, Sørli T, Nordøy T. Supporting doctor-patient communication: Providing a question prompt list and audio recording of the consultation as communication aids to outpatients in a cancer clinic. *Patient Educ Couns* [Internet]. 2018 Sep [cited 2019 Apr 18];101(9):1594–600. Available from: <http://www.ncbi.nlm.nih.gov/pubmed/29703493>
43. Adam R, Burton CD, Bond CM, de Bruin M, Murchie P. Can patient-reported measurements of pain be used to improve cancer pain management? A systematic review and meta-analysis. *BMJ Support Palliat Care* [Internet]. 2016 Nov 22 [cited 2017 Jan 30]; Available from: <http://spcare.bmj.com/content/early/2016/11/22/bmjspcare-2016-001137.abstract>
44. Cambridge Analytica: The story so far - BBC News [Internet]. [cited 2019 Aug 19]. Available from: <https://www.bbc.co.uk/news/technology-43465968>
45. Social media urged to take “moment to reflect” after girl’s death | Media | The Guardian [Internet]. [cited 2019 Aug 19]. Available from: <https://www.theguardian.com/media/2019/jan/30/social-media-urged-to-take-moment-to-reflect-after-girls-death>
46. How we assess health apps and digital tools - NHS Digital [Internet]. [cited 2019 Aug 19]. Available from: <https://digital.nhs.uk/services/nhs-apps-library/guidance-for-health-app-developers-commissioners-and-assessors/how-we-assess-health-apps-and-digital-tools#how-the-assessment-works>

- 1  
2  
3 47. Tricco AC, Lillie E, Zarin W, O'Brien KK, Colquhoun H, Levac D, et al. PRISMA  
4 Extension for Scoping Reviews (PRISMA-ScR): Checklist and Explanation. Ann  
5 Intern Med [Internet]. 2018 Oct 2 [cited 2019 Jun 13];169(7):467. Available from:  
6 <http://annals.org/article.aspx?doi=10.7326/M18-0850>  
7  
8  
9  
10  
11  
12  
13  
14  
15  
16  
17  
18  
19  
20  
21  
22  
23  
24  
25  
26  
27  
28  
29  
30  
31  
32  
33  
34  
35  
36  
37  
38  
39  
40  
41  
42  
43  
44  
45  
46  
47  
48  
49  
50  
51  
52  
53  
54  
55  
56  
57  
58  
59  
60

For peer review only



**Figure 1: Identification and screening process for apps included in this review**

\*Apple's app store was searched up to and not including the 500<sup>th</sup> app on the on-line store: after several hundred apps, the apps became less relevant to our review

\*\* There were three apps which we were unable to find again after the initial searches: two (*faith.org*; and *ovarian cancer treatments (things to do)* seemed to be removed from the store, and there was an administrative error during recording the name of the third app, which led to a missing field in our exclusion file

**Table S1: Full list of apps and descriptive data extracted from stores.**

| Name of App                               | Name of developer                         | Cancer Type | Owner Nature*           | Country*    | Platform | Fee                       | Downloads (Google only) | Number of raters / (rating out of 5.0) Google | Number of raters / (rating out of 5.0) Apple \$ |
|-------------------------------------------|-------------------------------------------|-------------|-------------------------|-------------|----------|---------------------------|-------------------------|-----------------------------------------------|-------------------------------------------------|
| 1 in 3 Cancer Support                     | Origin Digital Limited                    | All         | Charity                 | UK          | Both     | Free                      | 10+                     | 1 (5.0)                                       | Not enough                                      |
| Adrenal cancer – others like me           | Eli Maliki                                | All         | Unclear                 | Unclear     | Google   | Free                      | 1000+                   | 2 (5.0)                                       | N/A                                             |
| Attack cancer using hypnosis              | Ron Eslinger (Healthy Visions)            | All         | Commercial              | USA         | Both     | £6.49 Google, £9.99 Apple | 10+                     | 2 (5.0)                                       | Not enough                                      |
| BCG Treatment                             | Rosewell Park Comprehensive cancer center | Bladder     | Healthcare organisation | USA         | Both     | Free                      | 50+                     | None                                          | Not enough                                      |
| BECCA – Breast cancer care app            | Breast cancer care                        | Breast      | Charity                 | UK          | Both     | Free                      | 5000+                   | 38 (4.5)                                      | 19 (4.5)                                        |
| BELONG Beating Cancer                     | BelongTail                                | All         | Commercial              | USA         | Both     | Free                      | 50000+                  | 661 (4.7)                                     | 29 (4.9)                                        |
| Best Prostate Cancer Treatment            | RL Technology LLC                         | Prostate    | Commercial              | Unclear     | Apple    | Free                      | N/A                     | N/A                                           | Not enough                                      |
| Bible verses for cancer – strength verses | Watchdis prayers                          | All         | Unclear                 | Netherlands | Google   | Free                      | 1000+                   | 26 (4.8)                                      | N/A                                             |
| BigC-Connect                              | Jane Boag                                 | All         | Charity                 | Singapore   | Both     | Free                      | 500+                    | 8 (5.0)                                       | Not enough                                      |
| Bladder Cancer Manager                    | point of care                             | Bladder     | Commercial              | USA         | Apple    | Free                      | N/A                     | N/A                                           | Not enough                                      |

|                                                |                                   |                |             |           |        |       |       |          |            |
|------------------------------------------------|-----------------------------------|----------------|-------------|-----------|--------|-------|-------|----------|------------|
| Blood cancer storylines                        | Self care catalysts               | Haematological | Commercial  | USA       | Both   | Free  | 50+   | none     | Not enough |
| Blood cancer treatment                         | Ahalya                            | Haematological | Unclear     | India     | Google | Free  | 500+  | 2 (5.0)  | N/A        |
| Boobytrapp                                     | Phoenix Consult PTE               | Breast         | Commercial  | Unclear   | Both   | Free  | 50+   | 2 (5.0)  | Not enough |
| Bowel Cancer                                   | Princeton Digital                 | Bowel          | Charity     | Australia | Both   | Free  | 1000+ | Missing  | Not enough |
| BRAVE Coalition                                | Tied Tech LLC                     | Breast         | Charity     | USA       | Apple  | Free  | N/A   | N/A      | Not enough |
| Breast Cancer Ally                             | University of Michigan            | Breast         | Academic    | USA       | Apple  | Free  | N/A   | N/A      | Not enough |
| Breast cancer Canada                           | Olive Branch of hope              | Breast         | Partnership | Canada    | Google | Free  | 10+   | none     | N/A        |
| Breast Cancer Diary                            | HomeInSync LLC                    | Breast         | Commercial  | USA       | Apple  | £4.99 | N/A   | N/A      | Not enough |
| Breast Cancer Healthline App                   | Healthline Networks Inc           | Breast         | Commercial  | USA       | Apple  | Free  | N/A   | N/A      | Not enough |
| Breast Cancer Manager                          | point of care                     | Breast         | Commercial  | USA       | Apple  | Free  | N/A   | N/A      | Not enough |
| Breast Cancer Social Network/My BC Team        | My Health teams                   | Breast         | Commercial  | USA       | Both   | Free  | 1000+ | 44 (4.2) | Not enough |
| Breast Cancer Survivor                         | Portable Medical technology Ltf   | Breast         | Charity     | Ireland   | Apple  | Free  | N/A   | N/A      | Not enough |
| Breast Cancer: Beyond the shock                | National breast cancer foundation | Breast         | Charity     | USA       | Apple  | Free  | N/A   | N/A      | Not enough |
| Breast cancer: information about breast cancer | Doctor Apps                       | Breast         | Commercial  | Unclear   | Google | Free  | 1000+ | 16 (4.6) | N/A        |

|                                         |                                                                |                    |                         |           |        |                           |         |          |            |
|-----------------------------------------|----------------------------------------------------------------|--------------------|-------------------------|-----------|--------|---------------------------|---------|----------|------------|
| Breast friends app                      | Barry O'Mahoney                                                | Breast             | Charity                 | USA       | Both   | Free                      | 10+     | None     | Not enough |
| Breast Cancer Gibraltar                 | Alan Pereira                                                   | Breast             | Charity                 | Gibraltar | Apple  | Free                      | N/A     | N/A      | Not enough |
| Bubble health                           | bubble health ltd                                              | Breast and ovarian | Commercial              | Unclear   | Both   | Free                      | 10+     | 2 (5.0)  | Not enough |
| CanAdvice+                              | MySmartHealth                                                  | Breast             | Healthcare organisation | UK        | Google | Free                      | 10+     | none     | N/A        |
| Cancel Cancer                           | Infinite Monkeys LLC                                           | All                | Commercial              | Unclear   | Apple  | Free                      | N/A     | N/A      | Not enough |
| Cancer awareness network                | Lewis Educational Consultants, Inc                             | All                | Charity                 | USA       | Both   | Free                      | 100+    | 10 (4.6) | Not enough |
| Cancer Care and Research News           | Dana-Farber Cancer Institute                                   | All                | Healthcare organisation | USA       | Apple  | Free                      | N/A     | N/A      | Not enough |
| Cancer chemotherapy and healing colours | (Ron) Michael Eslinger (Healthy Visions)                       | All                | Commercial              | USA       | Both   | £6.49 Google, £8.99 Apple | 10+     | 2 (3.0)  | Not enough |
| Cancer Connect                          | Maree Hamilton                                                 | All                | Commercial              | Australia | Apple  | Free                      | N/A     | N/A      | Not enough |
| Cancer cure                             | Balogh Jozsef Zoltan                                           | All                | Unclear                 | Hungary   | Google | £28.90                    | 1+      | none     | N/A        |
| Cancer curing foods                     | Proven Digital Web Solutions                                   | All                | Commercial              | India     | Google | Free                      | 10,000+ | 98 (4.4) | N/A        |
| Cancer defeated                         | Christopher DiCristo, MagnifyMobile                            | All                | Commercial              | USA       | Both   | Free                      | 100+    | 2 (2.0)  | Not enough |
| Cancer Emergency Response Tool          | Dorset cancer centre, developed by Portable Medical Technology | All                | Healthcare organisation | UK        | Apple  | Free                      | N/A     | N/A      | Not enough |
| Cancer fighting app                     | Bhaktiedge                                                     | All                | Unclear                 | Unclear   | Google | Free                      | 50+     | None     | N/A        |
| Cancer fighting foods                   | Ayoub Bousetta, B6Squad Dev.                                   | All                | Commercial              | Morocco   | Google | Free                      | 10,000+ | 29 (4.2) | N/A        |

|                                |                                                           |     |                  |                 |        |      |         |           |            |
|--------------------------------|-----------------------------------------------------------|-----|------------------|-----------------|--------|------|---------|-----------|------------|
| Cancer iChart                  | Liverpool Drug Interactions Group                         | All | Academic         | UK              | Both   | Free | 50+     | 2 (4.0)   | Not enough |
| Cancer Sites@Jeff              | Thomas Jefferson University                               | All | Academic         | USA             | Apple  | Free | N/A     | N/A       | Not enough |
| Cancer Support Community VVSB  | Cancer support community VVSB, developed by Globonet Inc. | All | Charity          | USA             | Apple  | Free | N/A     | N/A       | Not enough |
| Cancer Surveillance            | GoMLV                                                     | All | Commercial       | Unclear         | Google | Free | 1000+   | 21 (3.7)  | N/A        |
| Cancer survivorship connection | Peachtree Solutions LLC                                   | All | Partnership      | USA             | Both   | Free | 10+     | 1 (5.0)   | Not enough |
| Cancer Together                | Independent Energy Consultancy Research                   | All | Unclear          | France          | Both   | Free | 10+     | none      | Not enough |
| Cancer-track and heal          | Camille Madelon                                           | All | Commercial       | Unclear         | Apple  | Free | N/A     | N/A       | Not enough |
| Cancer Treatment Calendar      | Long Nguyen                                               | All | Commercial       | Unclear         | Apple  | Free | N/A     | N/A       | Not enough |
| Cancer treatment tips          | globalapps24                                              | All | Commercial       | Unclear         | Google | Free | 100+    | none      | N/A        |
| Cancer wellness                | S J Grant Unicorn Pacific Corps                           | All | Commercial       | Pacific Islands | Apple  | Free | N/A     | N/A       | Not enough |
| Cancer.Fitness Community       | MAWaza LLC                                                | All | Commercial       | USA             | Both   | Free | 50+     | none      | Not enough |
| Cancer.Net mobile              | ASCO                                                      | All | Clinical Society | USA             | Both   | Free | 10,000+ | 212 (4.3) | Not enough |
| CancerAid                      | CancerAid PTY Ltd                                         | All | Commercial       | >1              | Both   | Free | 1,000+  | 25 (3.7)  | Not enough |
| CancerIS                       | LemonMD                                                   | All | Commercial       | USA             | Apple  | Free | N/A     | N/A       | Not enough |

|                                    |                                                                             |            |                                 |           |        |                                    |      |          |            |
|------------------------------------|-----------------------------------------------------------------------------|------------|---------------------------------|-----------|--------|------------------------------------|------|----------|------------|
| Cancerosity – cancer network       | Throwr Pty Ltd                                                              | All        | Commercial                      | Australia | Apple  | Free                               | N/A  | N/A      | Not enough |
| CancerStop                         | Queromatics                                                                 | All        | Commercial                      | USA       | Google | Free                               | 100+ | 15 (5.0) | N/A        |
| CanDi – cancer diet app            | Faculty of Health Sciences<br>University Universiti Sultan<br>Zainal Abidin | All        | Academic                        | Malaysia  | Google | Free                               | 500+ | 59 (4.7) | N/A        |
| CanHOPE cancer support             | LEAPP for Parkway Cancer Centre                                             | All        | Charity                         | Singapore | Apple  | Free                               | N/A  | N/A      | Not enough |
| CarcinoidNETs<br>HealthStorylines  | Self care catalysts                                                         | Carcinoid  | Partnership                     | USA       | Both   | Free                               | 500+ | 8 (4.2)  | Not enough |
| Chemo brain                        | Katharine Hargrove                                                          | All        | Commercial                      | USA       | Google | Free                               | 100+ | 1 (5.0)  | N/A        |
| Chemotherapy                       | Rahul Baweja, Alpesh Patel                                                  | All        | Unclear                         | Unclear   | Both   | Free                               | 100+ | None     | Not enough |
| Cleveland Clinic<br>Cancer Trials  | Cleveland Clinic Innovations                                                | All        | Healthcare organisation         | USA       | Apple  | Free                               | N/A  | N/A      | Not enough |
| ClinTrial refer<br>breast cancer   | Haematology Clinical Research<br>Network, New South Wales                   | Breast     | Clinical<br>research<br>network | >1        | Both   | Free                               | 100+ | 1 (5.0)  | Not enough |
| ClinTrial Refer<br>Cancer Genetics | Haematology Clinical Research<br>Network, New South Wales                   | All        | Clinical<br>research<br>network | >1        | Both   | Free                               | 50+  | 1 (5.0)  | Not enough |
| ClinTrial Refer SA<br>Cancer       | Haematology Clinical Research<br>Network, New South Wales                   | All        | Clinical<br>research<br>network | Australia | Both   | Free                               | 10+  | None     | Not enough |
| Cnected                            | Get Cnected Ltd                                                             | All        | Commercial                      | UK        | Apple  | Free                               | N/A  | N/A      | 14 (4.7)   |
| Colon cancer                       | (Ron) Michael Eslinger Healthy<br>Visions                                   | Colorectal | Commercial                      | USA       | Both   | £5.49<br>Google,<br>£8.99<br>Apple | 1+   | None     | Not enough |

|                                       |                                      |          |                         |           |        |         |         |          |            |
|---------------------------------------|--------------------------------------|----------|-------------------------|-----------|--------|---------|---------|----------|------------|
| Community guide for women with cancer | Charach Cancer Treatment Center      | All      | Healthcare organisation | USA       | Both   | Free    | 50+     | 2 (5.0)  | Not enough |
| Don't die 2                           | MiSong Foundation. Org               | All      | Unclear                 | USA       | Google | £299.99 | 0+      | None     | N/A        |
| E-home app questionnaires             | Alice Lee Centre for Nursing Studies | Breast   | Academic                | Singapore | Google | Free    | 10+     | None     | N/A        |
| Emory AWAKE                           | Emory University                     | All      | Academic                | USA       | Both   | Free    | 10+     | None     | Not enough |
| Eva: Cancer Support                   | Eva LLC                              | All      | Commercial              | USA       | Both   | Free    | 10+     | None     | Not enough |
| Eye cancer treatments                 | Things To Do                         | Eye      | Commercial              | Unclear   | Google | Free    | 10+     | None     | N/A        |
| Fight cancer naturally                | Dr Isaac's Holistic Wellness         | All      | Healthcare organisation | India     | Google | Free    | 100+    | 1 (1.0)  | N/A        |
| Focus on lymphoma                     | Lymphoma Research Foundation         | Lymphoma | Charity                 | USA       | Both   | Free    | 5,000+  | 53 (4.7) | 9 (4.4)    |
| For Cancer Care                       | AMC Energy Canada                    | All      | Commercial              | Canada    | Both   | Free    | 10+     | None     | Not enough |
| Hope abounds inc.                     | Hope Abounds Imc                     | All      | Charity                 | USA       | Both   | Free    | 10+     | None     | Not enough |
| iCancerHealth Cancer Care             | Medocity                             | All      | Commercial              | USA       | Both   | Free    | 1,000 + | 33 (4.4) | Not enough |
| Inkspiration                          | Crispin Porter & Bogusky             | Breast   | Charity                 | USA       | Apple  | Free    | N/A     | N/A      | Not enough |
| Inspiration of cancer survivor story  | CaveApps                             | All      | Commercial              | Malaysia  | Google | Free    | 10+     | None     | N/A        |
| It's a MANTHING – Prostate Cancer     | Prostaaid                            | Prostate | Charity                 | UK        | Both   | Free    | 500+    | 5 (5.0)  | Not enough |

|    |                                          |                             |                   |             |         |        |                                     |      |         |            |
|----|------------------------------------------|-----------------------------|-------------------|-------------|---------|--------|-------------------------------------|------|---------|------------|
| 1  | Ketogenic therapy for cancer             | seawellsoft private Limited | All               | Commercial  | India   | Both   | £9.49<br>Google,<br>£12.99<br>Apple | 10+  | 6 (4.8) | Not enough |
| 2  | Kidney cancer health storylines          | self care catalysts         | Kidney            | Commercial  | >1      | Apple  | Free                                | N/A  | N/A     | Not enough |
| 3  | Kidney cancer manager                    | point of care               | Kidney            | Commercial  | USA     | Apple  | Free                                | N/A  | N/A     | Not enough |
| 4  | Kids cancer meds                         | David Ziegler               | All               | Commercial  | Unclear | Both   | Free                                | 10+  | None    | Not enough |
| 5  | Live like Cameron                        | Melisa Fulling/ Rooterdog   | Childhood cancers | Charity     | USA     | Both   | Free                                | 50+  | 1 (5.0) | Not enough |
| 6  | Liver cancer manager                     | point of care               | Liver             | Commercial  | USA     | Apple  | Free                                | N/A  | N/A     | Not enough |
| 7  | Living with cancer                       | Things To Do                | All               | Commercial  | Unclear | Google | Free                                | 100+ | None    | N/A        |
| 8  | Loving meditations                       | Mind Health LLC             | All               | Commercial  | USA     | Both   | Free                                | 10+  | Missing | Not enough |
| 9  | Lung Cancer Foundation                   | Open cancer network         | Lung              | Charity     | USA     | Apple  | Free                                | N/A  | N/A     | Not enough |
| 10 | Lung Cancer Manager                      | point of care               | Lung              | Commercial  | USA     | Apple  | Free                                | N/A  | N/A     | Not enough |
| 11 | Lung cancer navigator                    | Lungevity foundation        | Lung              | Charity     | USA     | Both   | Free                                | 100+ | 2 (3.0) | Not enough |
| 12 | Lung cancer treatment                    | Things To Do                | Lung              | Commercial  | Unclear | Google | Free                                | 100+ | None    | N/A        |
| 13 | Malecare prostate cancer                 | Malecare                    | Prostate          | Charity     | USA     | Apple  | Free                                | N/A  | N/A     | Not enough |
| 14 | Markey cancer center clinical trials app | University of Kentucky      | All               | Partnership | USA     | Apple  | Free                                | N/A  | N/A     | Not enough |



|                                                   |                                                                |                             |                         |         |        |                           |         |           |            |
|---------------------------------------------------|----------------------------------------------------------------|-----------------------------|-------------------------|---------|--------|---------------------------|---------|-----------|------------|
| MASCC Antiemesis Tool                             | Multinational Association of Supportive Care in Cancer (MASCC) | All                         | Partnership             | USA     | Both   | Free                      | 1000+   | 8 (4+)    | Not enough |
| MD Anderson Mobile                                | MD Anderson cancer center                                      | All                         | Healthcare organisation | USA     | Both   | Free                      | 10,000+ | 305 (4.2) | Not enough |
| Melanoma UK                                       | Melanoma UK and Vitaccess LTd                                  | Melanoma                    | Partnership             | UK      | Both   | Free                      | 100+    | 2 (5.0)   | Not enough |
| Merry medicine                                    | 9wise                                                          | All                         | Commercial              | >1      | Google | £7.49                     | 1+      | 1 (5.0)   | N/A        |
| Mesothelioma Malignant Tumor Staging chemotherapy | Eduardo D'Avila                                                | Mesothelioma                | Unclear                 | USA     | Google | Free                      | 50+     | 4 (5.0)   | N/A        |
| MeTime Acupressure                                | University of Michigan                                         | All                         | Academic                | USA     | Both   | £9.49 Google, £9.99 Apple | 5+      | None      | Not enough |
| Mindful cancer                                    | Gordon Mullins                                                 | All                         | Unclear                 | Unclear | Apple  | Free                      | N/A     | N/A       | Not enough |
| Mouth cancer treatment                            | Things To Do                                                   | Oral                        | Commercial              | Unclear | Google | Free                      | 100+    | None      | N/A        |
| MVR Cancer Centre                                 | MVR Cancer Centre and research institute, Calicut              | All                         | Healthcare organisation | India   | Google | Free                      | 100+    | 5 (5.0)   | N/A        |
| My breast cancer advocate                         | Pathways2healing.us                                            | Breast                      | Commercial              | USA     | Google | £1.22                     | 10+     | 3 (5.0)   | N/A        |
| My Cancer Coach                                   | Genomic health                                                 | Breast, prostate, and colon | Partnership             | USA     | Both   | Free                      | 10,000+ | 65 (4.4)  | Not enough |
| My Care Plan – cancer survivors                   | Journey forward                                                | All                         | Partnership             | USA     | Both   | Free                      | 500+    | 4 (4.0)   | Not enough |
| My Head & Neck Cancer Manager                     | point of care                                                  | Head and neck               | Commercial              | USA     | Apple  | Free                      | N/A     | N/A       | Not enough |

|                                           |                                                           |                     |                         |         |        |      |        |          |            |
|-------------------------------------------|-----------------------------------------------------------|---------------------|-------------------------|---------|--------|------|--------|----------|------------|
| My liver                                  | AGF studios Ltd for National Health Service               | Liver               | Healthcare organisation | UK      | Apple  | Free | N/A    | N/A      | 14 (5.0)   |
| My Pancreas                               | AGF studios Ltd for National Health Service               | Pancreatic          | Healthcare organisation | UK      | Apple  | Free | N/A    | N/A      | 7 (5.0)    |
| My Prostate Cancer Manager                | point of care                                             | Prostate            | Commercial              | USA     | Apple  | Free | N/A    | N/A      | Not enough |
| MyMSK                                     | Memorial Sloan-Kettering Cancer Center                    | All                 | Healthcare organisation | USA     | Both   | Free | 1,000+ | 4 (3.8)  | Not enough |
| NCCN Patient Guides for Cancer            | National Comprehensive Cancer Network                     | All                 | Charity                 | USA     | Both   | Free | 1,000+ | 4 (4.5)  | Not enough |
| NED for prostate cancer                   | University Health Network, Toronto                        | Prostate            | Academic                | Canada  | Both   | Free | 10+    | None     | Not enough |
| ONCompanion                               | ONCompanion foundation programmed by we builld technology | All                 | Charity                 | India   | Google | Free | 10+    | 3 (5.0)  | N/A        |
| OneRemission                              | OneRemission                                              | All                 | Commercial              | USA     | Apple  | Free | N/A    | N/A      | Not enough |
| Ovarian Cancer Symptoms Diary             | Ovarian Cancer Action (programmed by electric putty)      | Ovarian             | Charity                 | UK      | Both   | Free | 1,000+ | 7 (4.3)  | Not enough |
| OWise breast cancer                       | Px Healthcare B.V. Ltd                                    | Breast              | Commercial              | >1      | Both   | Free | 1,000+ | 10 (4.4) | Not enough |
| Oxford Cancer and Haematology Outpatients | Oxford University Hospitals NHS foundation                | All                 | Healthcare organisation | UK      | Apple  | Free | N/A    | N/A      | Not enough |
| Personalized sarcoma care                 | Mobile Pioneers BV                                        | Soft tissue sarcoma | Unclear                 | Unclear | Both   | Free | 100+   | 8 (4+)   | Not enough |
| Phil's friends                            | Phils friends organisation, developed by subsplash inc    | All                 | Charity                 | USA     | Both   | Free | 50+    | 1 (5.0)  | Not enough |
| PM Cancer Journey                         | University Health Network, Toronto                        | All                 | Partnership             | Canada  | Both   | Free | 500+   | 6 (4.8)  | Not enough |

|                                                 |                                                                          |                |                         |           |        |      |        |          |            |
|-------------------------------------------------|--------------------------------------------------------------------------|----------------|-------------------------|-----------|--------|------|--------|----------|------------|
| Pocket Cancer Care Guide                        | National Coalition for Cancer Survivorship                               | All            | Charity                 | USA       | Apple  | Free | N/A    | N/A      | Not enough |
| Pratheeksha                                     | Pratheeksha clinic                                                       | All            | Healthcare organisation | India     | Both   | Free | 100+   | 14 (4.8) | Not enough |
| Prostate cancer support group Gibraltar         | Prostate cancer support group, Gibraltar, developed by Alan Pereira      | Prostate       | Charity                 | Gibraltar | Apple  | Free | N/A    | N/A      | Not enough |
| Prostate cancer treatment                       | Creative live apps                                                       | Prostate       | Unclear                 | Unclear   | Google | Free | 10+    | None     | N/A        |
| Prostate cancer we have your back               | Infinite Monkeys LLC                                                     | Prostate       | Unclear                 | Unclear   | Apple  | Free | N/A    | N/A      | Not enough |
| Qigong for cancer healing and prevention        | Yang's Martial Arts Association Publication Center, Inc.                 | All            | Commercial              | USA       | Both   | Free | 100+   | None     | Not enough |
| Radiotherapy                                    | incroyable future for skin safety.com                                    | All            | Commercial              | Canada    | Google | Free | 50+    | None     | N/A        |
| RB-World App                                    | KinderAugenKrebsStiftung KAKS (Childrens' eye cancer foundation Germany_ | Retinoblastoma | Charity                 | Germany   | Both   | Free | 100+   | 2 (4+)   | Not enough |
| Safe and easy cancer/ Easy ways to treat cancer | 999 Apps Developer                                                       | All            | Unclear                 | Unclear   | Google | Free | 10+    | 1 (5.0)  | N/A        |
| SCICancer Clinical Trials                       | Stanford University                                                      | All            | Partnership             | USA       | Both   | Free | 100+   | None     | Not enough |
| Self Care During Cancer                         | Nearspace inc for genetech inc, anthem inc                               | All            | Partnership             | USA       | Both   | Free | 1,000+ | 6 (4.7)  | Not enough |
| Signs and symptoms breast cancer                | Built By Doctors Ltd                                                     | Breast         | Commercial              | USA       | Both   | Free | 100+   | None     | Not enough |
| Skin Cancer Manager                             | point of care                                                            | Skin           | Commercial              | USA       | Apple  | Free | N/A    | N/A      | Not enough |

|                                |                                            |            |                         |             |        |      |        |          |            |
|--------------------------------|--------------------------------------------|------------|-------------------------|-------------|--------|------|--------|----------|------------|
| Stupid Cancer                  | Gryt health for stupid cancer.org          | All        | Charity                 | USA         | Both   | Free | 1,000+ | 10 (3.9) | Not enough |
| Super food to fight for cancer | cyclonblast mobile apps                    | All        | Unclear                 | unclear     | Google | Free | 100+   | 3 (4.3)  | N/A        |
| Survivor care                  | University medical centre Groningen        | All        | Healthcare organisation | Netherlands | Apple  | Free | N/A    | N/A      | Not enough |
| SwiSupport – HealingMusic      | Jun-Wei Su                                 | All        | Commercial              | Unclear     | Apple  | Free | N/A    | N/A      | Not enough |
| T.I.N.A                        | Kognito                                    | All        | Partnership             | USA         | Both   | Free | 10+    | None     | Not enough |
| Testicular cancer              | Expert health studios                      | Testicular | Commercial              | unclear     | Google | Free | 5,000+ | 13 (3.8) | N/A        |
| Thrivor                        | thrivor pty ltd                            | All        | Commercial              | unclear     | Both   | Free | 100+   | 4 (5.0)  | Not enough |
| Treat prostate cancer          | martinandoapp                              | Prostate   | Commercial              | unclear     | Google | Free | 500+   | 1 (5.0)  | Not enough |
| Treating bladder cancer        | NonitaDev                                  | Bladder    | Unclear                 | unclear     | Google | Free | 50+    | None     | N/A        |
| Triple negative breast cancer  | Kognito                                    | Breast     | Partnership             | USA         | Both   | Free | 100+   | 1 (5.0)  | Not enough |
| Twist out cancer               | Rochishna Aloor                            | All        | Charity                 | >1          | Apple  | Free | N/A    | N/A      | Not enough |
| Types of cancer treatment      | Dinatale                                   | All        | Commercial              | Unclear     | Google | Free | 100+   | 2 (3.0)  | N/A        |
| Untire: Beating cancer fatigue | tired of cancer                            | All        | Charity                 | Netherlands | Both   | Free | 1,000+ | 43 (4.5) | Not enough |
| Various cancer cures           | EmirZIApps                                 | All        | Commercial              | unclear     | Google | Free | 500+   | 2 (3.0)  | N/A        |
| Ways to fight off cancer       | Koodalappz on android, sathish bc on apple | All        | Commercial              | unclear     | Both   | Free | 1,000+ | 3 (5.0)  | N/A        |

|                 |                 |     |            |       |        |      |     |      |            |
|-----------------|-----------------|-----|------------|-------|--------|------|-----|------|------------|
| Whip Cancer     | Copley Raff Inc | All | Commercial | USA   | Apple  | Free | N/A | N/A  | Not enough |
| Yoga vs. cancer | Antioch studio  | All | Commercial | Spain | Google | Free | 10+ | None | N/A        |

\*The nature of the owner and country of origin was open to a degree of interpretation/judgement by the authors, and therefore we involved two authors in extracting this data independently. Linked websites were visited. There were high levels of agreement and we reached consensus by discussion. We have applied the term “charity” to cover non-profit organisations.

\$Google Play will publish a “star” rating when there is one or more reviews of the app. Many of the apps available via Apple’s app store reported that there were not enough reviews to present a star rating. Ratings were accurate to November 2018.

## Preferred Reporting Items for Systematic reviews and Meta-Analyses extension for Scoping Reviews (PRISMA-ScR) Checklist

| SECTION                           | ITEM | PRISMA-ScR CHECKLIST ITEM                                                                                                                                                                                                                                                                                  | REPORTED ON PAGE #                     |
|-----------------------------------|------|------------------------------------------------------------------------------------------------------------------------------------------------------------------------------------------------------------------------------------------------------------------------------------------------------------|----------------------------------------|
| <b>TITLE</b>                      |      |                                                                                                                                                                                                                                                                                                            |                                        |
| Title                             | 1    | Identify the report as a scoping review.                                                                                                                                                                                                                                                                   | 1                                      |
| <b>ABSTRACT</b>                   |      |                                                                                                                                                                                                                                                                                                            |                                        |
| Structured summary                | 2    | Provide a structured summary that includes (as applicable): background, objectives, eligibility criteria, sources of evidence, charting methods, results, and conclusions that relate to the review questions and objectives.                                                                              | 2                                      |
| <b>INTRODUCTION</b>               |      |                                                                                                                                                                                                                                                                                                            |                                        |
| Rationale                         | 3    | Describe the rationale for the review in the context of what is already known. Explain why the review questions/objectives lend themselves to a scoping review approach.                                                                                                                                   | 3                                      |
| Objectives                        | 4    | Provide an explicit statement of the questions and objectives being addressed with reference to their key elements (e.g., population or participants, concepts, and context) or other relevant key elements used to conceptualize the review questions and/or objectives.                                  | 3                                      |
| <b>METHODS</b>                    |      |                                                                                                                                                                                                                                                                                                            |                                        |
| Protocol and registration         | 5    | Indicate whether a review protocol exists; state if and where it can be accessed (e.g., a Web address); and if available, provide registration information, including the registration number.                                                                                                             | X, reported in limitations, discussion |
| Eligibility criteria              | 6    | Specify characteristics of the sources of evidence used as eligibility criteria (e.g., years considered, language, and publication status), and provide a rationale.                                                                                                                                       | 5                                      |
| Information sources*              | 7    | Describe all information sources in the search (e.g., databases with dates of coverage and contact with authors to identify additional sources), as well as the date the most recent search was executed.                                                                                                  | 5                                      |
| Search                            | 8    | Present the full electronic search strategy for at least 1 database, including any limits used, such that it could be repeated.                                                                                                                                                                            | 5                                      |
| Selection of sources of evidence† | 9    | State the process for selecting sources of evidence (i.e., screening and eligibility) included in the scoping review.                                                                                                                                                                                      | 5                                      |
| Data charting process‡            | 10   | Describe the methods of charting data from the included sources of evidence (e.g., calibrated forms or forms that have been tested by the team before their use, and whether data charting was done independently or in duplicate) and any processes for obtaining and confirming data from investigators. | 6                                      |
| Data items                        | 11   | List and define all variables for which data were sought and any assumptions and simplifications made.                                                                                                                                                                                                     | 6                                      |
| Critical appraisal of individual  | 12   | If done, provide a rationale for conducting a critical appraisal of included sources of evidence; describe                                                                                                                                                                                                 | Not done                               |

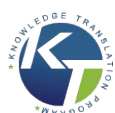

| SECTION                                       | ITEM | PRISMA-ScR CHECKLIST ITEM                                                                                                                                                                       | REPORTED ON PAGE #        |
|-----------------------------------------------|------|-------------------------------------------------------------------------------------------------------------------------------------------------------------------------------------------------|---------------------------|
| sources of evidence§                          |      | the methods used and how this information was used in any data synthesis (if appropriate).                                                                                                      |                           |
| Synthesis of results                          | 13   | Describe the methods of handling and summarizing the data that were charted.                                                                                                                    | 7                         |
| <b>RESULTS</b>                                |      |                                                                                                                                                                                                 |                           |
| Selection of sources of evidence              | 14   | Give numbers of sources of evidence screened, assessed for eligibility, and included in the review, with reasons for exclusions at each stage, ideally using a flow diagram.                    | 23                        |
| Characteristics of sources of evidence        | 15   | For each source of evidence, present characteristics for which data were charted and provide the citations.                                                                                     | Supplementary data        |
| Critical appraisal within sources of evidence | 16   | If done, present data on critical appraisal of included sources of evidence (see item 12).                                                                                                      | Not done                  |
| Results of individual sources of evidence     | 17   | For each included source of evidence, present the relevant data that were charted that relate to the review questions and objectives.                                                           | 7-17                      |
| Synthesis of results                          | 18   | Summarize and/or present the charting results as they relate to the review questions and objectives.                                                                                            | 7-17                      |
| <b>DISCUSSION</b>                             |      |                                                                                                                                                                                                 |                           |
| Summary of evidence                           | 19   | Summarize the main results (including an overview of concepts, themes, and types of evidence available), link to the review questions and objectives, and consider the relevance to key groups. | 18                        |
| Limitations                                   | 20   | Discuss the limitations of the scoping review process.                                                                                                                                          | 20                        |
| Conclusions                                   | 21   | Provide a general interpretation of the results with respect to the review questions and objectives, as well as potential implications and/or next steps.                                       | 21                        |
| <b>FUNDING</b>                                |      |                                                                                                                                                                                                 |                           |
| Funding                                       | 22   | Describe sources of funding for the included sources of evidence, as well as sources of funding for the scoping review. Describe the role of the funders of the scoping review.                 | Click here to enter text. |

JBI = Joanna Briggs Institute; PRISMA-ScR = Preferred Reporting Items for Systematic reviews and Meta-Analyses extension for Scoping Reviews.

\* Where *sources of evidence* (see second footnote) are compiled from, such as bibliographic databases, social media platforms, and Web sites.

† A more inclusive/heterogeneous term used to account for the different types of evidence or data sources (e.g., quantitative and/or qualitative research, expert opinion, and policy documents) that may be eligible in a scoping review as opposed to only studies. This is not to be confused with *information sources* (see first footnote).

‡ The frameworks by Arksey and O'Malley (6) and Levac and colleagues (7) and the JBI guidance (4, 5) refer to the process of data extraction in a scoping review as data charting.

§ The process of systematically examining research evidence to assess its validity, results, and relevance before using it to inform a decision. This term is used for items 12 and 19 instead of "risk of bias" (which is more applicable to systematic reviews of interventions) to include and acknowledge the various sources of evidence that may be used in a scoping review (e.g., quantitative and/or qualitative research, expert opinion, and policy document).

From: Tricco AC, Lillie E, Zarin W, O'Brien KK, Colquhoun H, Levac D, et al. PRISMA Extension for Scoping Reviews (PRISMA-ScR): Checklist and Explanation. *Ann Intern Med.* ;169:467–473. doi: 10.7326/M18-0850



St. Michael's

Inspired Care.  
Inspiring Science.

For peer review only - <http://bmjopen.bmj.com/site/about/guidelines.xhtml>
