# Supplementary material for: Publicly available apps for cancer survivors: a scoping review
Source: PubMed Central journal article supplement — BMJ Open. 2019 Sep 30;9(9):e032510. doi: 10.1136/bmjopen-2019-032510 (PMC6773350; doi:10.1136/bmjopen-2019-032510), 2019-09-30
Supplement: bmjopen-2019-032510supp001.pdf [file bmjopen-2019-032510supp001.pdf]

**Table S1: Full list of apps and descriptive data extracted from stores.**

| Name of App                               | Name of developer                         | Cancer Type | Owner Nature*           | Country*    | Platform | Fee                       | Downloads (Google only) | Number of raters / (rating out of 5.0) Google | Number of raters / (rating out of 5.0) Apple \$ |
|-------------------------------------------|-------------------------------------------|-------------|-------------------------|-------------|----------|---------------------------|-------------------------|-----------------------------------------------|-------------------------------------------------|
| 1 in 3 Cancer Support                     | Origin Digital Limited                    | All         | Charity                 | UK          | Both     | Free                      | 10+                     | 1 (5.0)                                       | Not enough                                      |
| Adrenal cancer – others like me           | Eli Maliki                                | All         | Unclear                 | Unclear     | Google   | Free                      | 1000+                   | 2 (5.0)                                       | N/A                                             |
| Attack cancer using hypnosis              | Ron Eslinger (Healthy Visions)            | All         | Commercial              | USA         | Both     | £6.49 Google, £9.99 Apple | 10+                     | 2 (5.0)                                       | Not enough                                      |
| BCG Treatment                             | Rosewell Park Comprehensive cancer center | Bladder     | Healthcare organisation | USA         | Both     | Free                      | 50+                     | None                                          | Not enough                                      |
| BECCA – Breast cancer care app            | Breast cancer care                        | Breast      | Charity                 | UK          | Both     | Free                      | 5000+                   | 38 (4.5)                                      | 19 (4.5)                                        |
| BELONG Beating Cancer                     | BelongTail                                | All         | Commercial              | USA         | Both     | Free                      | 50000+                  | 661 (4.7)                                     | 29 (4.9)                                        |
| Best Prostate Cancer Treatment            | RL Technology LLC                         | Prostate    | Commercial              | Unclear     | Apple    | Free                      | N/A                     | N/A                                           | Not enough                                      |
| Bible verses for cancer – strength verses | Watchdis prayers                          | All         | Unclear                 | Netherlands | Google   | Free                      | 1000+                   | 26 (4.8)                                      | N/A                                             |
| BigC-Connect                              | Jane Boag                                 | All         | Charity                 | Singapore   | Both     | Free                      | 500+                    | 8 (5.0)                                       | Not enough                                      |
| Bladder Cancer Manager                    | point of care                             | Bladder     | Commercial              | USA         | Apple    | Free                      | N/A                     | N/A                                           | Not enough                                      |

|                                                |                                   |                |             |           |        |       |       |          |            |
|------------------------------------------------|-----------------------------------|----------------|-------------|-----------|--------|-------|-------|----------|------------|
| Blood cancer storylines                        | Self care catalysts               | Haematological | Commercial  | USA       | Both   | Free  | 50+   | none     | Not enough |
| Blood cancer treatment                         | Ahalya                            | Haematological | Unclear     | India     | Google | Free  | 500+  | 2 (5.0)  | N/A        |
| Boobytrapp                                     | Phoenix Consult PTE               | Breast         | Commercial  | Unclear   | Both   | Free  | 50+   | 2 (5.0)  | Not enough |
| Bowel Cancer                                   | Princeton Digital                 | Bowel          | Charity     | Australia | Both   | Free  | 1000+ | Missing  | Not enough |
| BRAVE Coalition                                | Tied Tech LLC                     | Breast         | Charity     | USA       | Apple  | Free  | N/A   | N/A      | Not enough |
| Breast Cancer Ally                             | University of Michigan            | Breast         | Academic    | USA       | Apple  | Free  | N/A   | N/A      | Not enough |
| Breast cancer Canada                           | Olive Branch of hope              | Breast         | Partnership | Canada    | Google | Free  | 10+   | none     | N/A        |
| Breast Cancer Diary                            | HomeInSync LLC                    | Breast         | Commercial  | USA       | Apple  | £4.99 | N/A   | N/A      | Not enough |
| Breast Cancer Healthline App                   | Healthline Networks Inc           | Breast         | Commercial  | USA       | Apple  | Free  | N/A   | N/A      | Not enough |
| Breast Cancer Manager                          | point of care                     | Breast         | Commercial  | USA       | Apple  | Free  | N/A   | N/A      | Not enough |
| Breast Cancer Social Network/My BC Team        | My Health teams                   | Breast         | Commercial  | USA       | Both   | Free  | 1000+ | 44 (4.2) | Not enough |
| Breast Cancer Survivor                         | Portable Medical technology Ltd   | Breast         | Charity     | Ireland   | Apple  | Free  | N/A   | N/A      | Not enough |
| Breast Cancer: Beyond the shock                | National breast cancer foundation | Breast         | Charity     | USA       | Apple  | Free  | N/A   | N/A      | Not enough |
| Breast cancer: information about breast cancer | Doctor Apps                       | Breast         | Commercial  | Unclear   | Google | Free  | 1000+ | 16 (4.6) | N/A        |

|                                         |                                                                |                    |                         |           |        |                           |         |          |            |
|-----------------------------------------|----------------------------------------------------------------|--------------------|-------------------------|-----------|--------|---------------------------|---------|----------|------------|
| Breast friends app                      | Barry O'Mahoney                                                | Breast             | Charity                 | USA       | Both   | Free                      | 10+     | None     | Not enough |
| Breast Cancer Gibraltar                 | Alan Pereira                                                   | Breast             | Charity                 | Gibraltar | Apple  | Free                      | N/A     | N/A      | Not enough |
| Bubble health                           | bubble health ltd                                              | Breast and ovarian | Commercial              | Unclear   | Both   | Free                      | 10+     | 2 (5.0)  | Not enough |
| CanAdvice+                              | MySmartHealth                                                  | Breast             | Healthcare organisation | UK        | Google | Free                      | 10+     | none     | N/A        |
| Cancel Cancer                           | Infinite Monkeys LLC                                           | All                | Commercial              | Unclear   | Apple  | Free                      | N/A     | N/A      | Not enough |
| Cancer awareness network                | Lewis Educational Consultants, Inc                             | All                | Charity                 | USA       | Both   | Free                      | 100+    | 10 (4.6) | Not enough |
| Cancer Care and Research News           | Dana-Farber Cancer Institute                                   | All                | Healthcare organisation | USA       | Apple  | Free                      | N/A     | N/A      | Not enough |
| Cancer chemotherapy and healing colours | (Ron) Michael Eslinger (Healthy Visions)                       | All                | Commercial              | USA       | Both   | £6.49 Google, £8.99 Apple | 10+     | 2 (3.0)  | Not enough |
| Cancer Connect                          | Maree Hamilton                                                 | All                | Commercial              | Australia | Apple  | Free                      | N/A     | N/A      | Not enough |
| Cancer cure                             | Balogh Jozsef Zoltan                                           | All                | Unclear                 | Hungary   | Google | £28.90                    | 1+      | none     | N/A        |
| Cancer curing foods                     | Proven Digital Web Solutions                                   | All                | Commercial              | India     | Google | Free                      | 10,000+ | 98 (4.4) | N/A        |
| Cancer defeated                         | Christopher DiCristo, MagnifyMobile                            | All                | Commercial              | USA       | Both   | Free                      | 100+    | 2 (2.0)  | Not enough |
| Cancer Emergency Response Tool          | Dorset cancer centre, developed by Portable Medical Technology | All                | Healthcare organisation | UK        | Apple  | Free                      | N/A     | N/A      | Not enough |
| Cancer fighting app                     | Bhaktiedge                                                     | All                | Unclear                 | Unclear   | Google | Free                      | 50+     | None     | N/A        |
| Cancer fighting foods                   | Ayoub Bousetta, B6Squad Dev.                                   | All                | Commercial              | Morocco   | Google | Free                      | 10,000+ | 29 (4.2) | N/A        |

|                                |                                                           |     |                  |                 |        |      |         |           |            |
|--------------------------------|-----------------------------------------------------------|-----|------------------|-----------------|--------|------|---------|-----------|------------|
| Cancer iChart                  | Liverpool Drug Interactions Group                         | All | Academic         | UK              | Both   | Free | 50+     | 2 (4.0)   | Not enough |
| Cancer Sites@Jeff              | Thomas Jefferson University                               | All | Academic         | USA             | Apple  | Free | N/A     | N/A       | Not enough |
| Cancer Support Community VVSB  | Cancer support community VVSB, developed by Globonet Inc. | All | Charity          | USA             | Apple  | Free | N/A     | N/A       | Not enough |
| Cancer Surveillance            | GoMLV                                                     | All | Commercial       | Unclear         | Google | Free | 1000+   | 21 (3.7)  | N/A        |
| Cancer survivorship connection | Peachtree Solutions LLC                                   | All | Partnership      | USA             | Both   | Free | 10+     | 1 (5.0)   | Not enough |
| Cancer Together                | Independent Energy Consultancy Research                   | All | Unclear          | France          | Both   | Free | 10+     | none      | Not enough |
| Cancer-track and heal          | Camille Madelon                                           | All | Commercial       | Unclear         | Apple  | Free | N/A     | N/A       | Not enough |
| Cancer Treatment Calendar      | Long Nguyen                                               | All | Commercial       | Unclear         | Apple  | Free | N/A     | N/A       | Not enough |
| Cancer treatment tips          | globalapps24                                              | All | Commercial       | Unclear         | Google | Free | 100+    | none      | N/A        |
| Cancer wellness                | S J Grant Unicorn Pacific Corps                           | All | Commercial       | Pacific Islands | Apple  | Free | N/A     | N/A       | Not enough |
| Cancer.Fitness Community       | MAWaza LLC                                                | All | Commercial       | USA             | Both   | Free | 50+     | none      | Not enough |
| Cancer.Net mobile              | ASCO                                                      | All | Clinical Society | USA             | Both   | Free | 10,000+ | 212 (4.3) | Not enough |
| CancerAid                      | CancerAid PTY Ltd                                         | All | Commercial       | >1              | Both   | Free | 1,000+  | 25 (3.7)  | Not enough |
| CancerIS                       | LemonMD                                                   | All | Commercial       | USA             | Apple  | Free | N/A     | N/A       | Not enough |

|                                    |                                                                             |            |                                 |           |        |                                    |      |          |            |
|------------------------------------|-----------------------------------------------------------------------------|------------|---------------------------------|-----------|--------|------------------------------------|------|----------|------------|
| Cancerosity – cancer network       | Throwr Pty Ltd                                                              | All        | Commercial                      | Australia | Apple  | Free                               | N/A  | N/A      | Not enough |
| CancerStop                         | Queromatics                                                                 | All        | Commercial                      | USA       | Google | Free                               | 100+ | 15 (5.0) | N/A        |
| CanDi – cancer diet app            | Faculty of Health Sciences<br>University Universiti Sultan<br>Zainal Abidin | All        | Academic                        | Malaysia  | Google | Free                               | 500+ | 59 (4.7) | N/A        |
| CanHOPE cancer support             | LEAPP for Parkway Cancer Centre                                             | All        | Charity                         | Singapore | Apple  | Free                               | N/A  | N/A      | Not enough |
| CarcinoidNETs<br>HealthStorylines  | Self care catalyts                                                          | Carcinoid  | Partnership                     | USA       | Both   | Free                               | 500+ | 8 (4.2)  | Not enough |
| Chemo brain                        | Katharine Hargrove                                                          | All        | Commercial                      | USA       | Google | Free                               | 100+ | 1 (5.0)  | N/A        |
| Chemotherapy                       | Rahul Baweja, Alpesh Patel                                                  | All        | Unclear                         | Unclear   | Both   | Free                               | 100+ | None     | Not enough |
| Cleveland Clinic<br>Cancer Trials  | Cleveland Clinic Innovations                                                | All        | Healthcare<br>organisation      | USA       | Apple  | Free                               | N/A  | N/A      | Not enough |
| ClinTrial refer<br>breast cancer   | Haematology Clinical Research<br>Network, New South Wales                   | Breast     | Clinical<br>research<br>network | >1        | Both   | Free                               | 100+ | 1 (5.0)  | Not enough |
| ClinTrial Refer<br>Cancer Genetics | Haematology Clinical Research<br>Network, New South Wales                   | All        | Clinical<br>research<br>network | >1        | Both   | Free                               | 50+  | 1 (5.0)  | Not enough |
| ClinTrial Refer SA<br>Cancer       | Haematology Clinical Research<br>Network, New South Wales                   | All        | Clinical<br>research<br>network | Australia | Both   | Free                               | 10+  | None     | Not enough |
| Cnected                            | Get Cnected Ltd                                                             | All        | Commercial                      | UK        | Apple  | Free                               | N/A  | N/A      | 14 (4.7)   |
| Colon cancer                       | (Ron) Michael Eslinger Healthy<br>Visions                                   | Colorectal | Commercial                      | USA       | Both   | £5.49<br>Google,<br>£8.99<br>Apple | 1+   | None     | Not enough |

|                                       |                                      |          |                         |           |        |         |         |          |            |
|---------------------------------------|--------------------------------------|----------|-------------------------|-----------|--------|---------|---------|----------|------------|
| Community guide for women with cancer | Charach Cancer Treatment Center      | All      | Healthcare organisation | USA       | Both   | Free    | 50+     | 2 (5.0)  | Not enough |
| Don't die 2                           | MiSong Foundation. Org               | All      | Unclear                 | USA       | Google | £299.99 | 0+      | None     | N/A        |
| E-home app questionnaires             | Alice Lee Centre for Nursing Studies | Breast   | Academic                | Singapore | Google | Free    | 10+     | None     | N/A        |
| Emory AWAKE                           | Emory University                     | All      | Academic                | USA       | Both   | Free    | 10+     | None     | Not enough |
| Eva: Cancer Support                   | Eva LLC                              | All      | Commercial              | USA       | Both   | Free    | 10+     | None     | Not enough |
| Eye cancer treatments                 | Things To Do                         | Eye      | Commercial              | Unclear   | Google | Free    | 10+     | None     | N/A        |
| Fight cancer naturally                | Dr Isaac's Holistic Wellness         | All      | Healthcare organisation | India     | Google | Free    | 100+    | 1 (1.0)  | N/A        |
| Focus on lymphoma                     | Lymphoma Research Foundation         | Lymphoma | Charity                 | USA       | Both   | Free    | 5,000+  | 53 (4.7) | 9 (4.4)    |
| For Cancer Care                       | AMC Energy Canada                    | All      | Commercial              | Canada    | Both   | Free    | 10+     | None     | Not enough |
| Hope abounds inc.                     | Hope Abounds Imc                     | All      | Charity                 | USA       | Both   | Free    | 10+     | None     | Not enough |
| iCancerHealth Cancer Care             | Medocity                             | All      | Commercial              | USA       | Both   | Free    | 1,000 + | 33 (4.4) | Not enough |
| Inkspiration                          | Crispin Porter & Bogusky             | Breast   | Charity                 | USA       | Apple  | Free    | N/A     | N/A      | Not enough |
| Inspiration of cancer survivor story  | CaveApps                             | All      | Commercial              | Malaysia  | Google | Free    | 10+     | None     | N/A        |
| It's a MANTHING – Prostate Cancer     | Prostaid                             | Prostate | Charity                 | UK        | Both   | Free    | 500+    | 5 (5.0)  | Not enough |

|                                          |                             |                   |             |         |        |                            |      |         |            |
|------------------------------------------|-----------------------------|-------------------|-------------|---------|--------|----------------------------|------|---------|------------|
| Ketogenic therapy for cancer             | seawellsoft private Limited | All               | Commercial  | India   | Both   | £9.49 Google, £12.99 Apple | 10+  | 6 (4.8) | Not enough |
| Kidney cancer health storylines          | self care catalysts         | Kidney            | Commercial  | >1      | Apple  | Free                       | N/A  | N/A     | Not enough |
| Kidney cancer manager                    | point of care               | Kidney            | Commercial  | USA     | Apple  | Free                       | N/A  | N/A     | Not enough |
| Kids cancer meds                         | David Ziegler               | All               | Commercial  | Unclear | Both   | Free                       | 10+  | None    | Not enough |
| Live like Cameron                        | Melisa Fulling/ Rooterdog   | Childhood cancers | Charity     | USA     | Both   | Free                       | 50+  | 1 (5.0) | Not enough |
| Liver cancer manager                     | point of care               | Liver             | Commercial  | USA     | Apple  | Free                       | N/A  | N/A     | Not enough |
| Living with cancer                       | Things To Do                | All               | Commercial  | Unclear | Google | Free                       | 100+ | None    | N/A        |
| Loving meditations                       | Mind Health LLC             | All               | Commercial  | USA     | Both   | Free                       | 10+  | Missing | Not enough |
| Lung Cancer Foundation                   | Open cancer network         | Lung              | Charity     | USA     | Apple  | Free                       | N/A  | N/A     | Not enough |
| Lung Cancer Manager                      | point of care               | Lung              | Commercial  | USA     | Apple  | Free                       | N/A  | N/A     | Not enough |
| Lung cancer navigator                    | Lungevity foundation        | Lung              | Charity     | USA     | Both   | Free                       | 100+ | 2 (3.0) | Not enough |
| Lung cancer treatment                    | Things To Do                | Lung              | Commercial  | Unclear | Google | Free                       | 100+ | None    | N/A        |
| Malecare prostate cancer                 | Malecare                    | Prostate          | Charity     | USA     | Apple  | Free                       | N/A  | N/A     | Not enough |
| Markey cancer center clinical trials app | University of Kentucky      | All               | Partnership | USA     | Apple  | Free                       | N/A  | N/A     | Not enough |

|                                                   |                                                                |                             |                         |         |        |                           |         |           |            |
|---------------------------------------------------|----------------------------------------------------------------|-----------------------------|-------------------------|---------|--------|---------------------------|---------|-----------|------------|
| MASCC Antiemesis Tool                             | Multinational Association of Supportive Care in Cancer (MASCC) | All                         | Partnership             | USA     | Both   | Free                      | 1000+   | 8 (4+)    | Not enough |
| MD Anderson Mobile                                | MD Anderson cancer center                                      | All                         | Healthcare organisation | USA     | Both   | Free                      | 10,000+ | 305 (4.2) | Not enough |
| Melanoma UK                                       | Melanoma UK and Vitaccess LTd                                  | Melanoma                    | Partnership             | UK      | Both   | Free                      | 100+    | 2 (5.0)   | Not enough |
| Merry medicine                                    | 9wise                                                          | All                         | Commercial              | >1      | Google | £7.49                     | 1+      | 1 (5.0)   | N/A        |
| Mesothelioma Malignant Tumor Staging chemotherapy | Eduardo D'Avila                                                | Mesothelioma                | Unclear                 | USA     | Google | Free                      | 50+     | 4 (5.0)   | N/A        |
| MeTime Acupressure                                | University of Michigan                                         | All                         | Academic                | USA     | Both   | £9.49 Google, £9.99 Apple | 5+      | None      | Not enough |
| Mindful cancer                                    | Gordon Mullins                                                 | All                         | Unclear                 | Unclear | Apple  | Free                      | N/A     | N/A       | Not enough |
| Mouth cancer treatment                            | Things To Do                                                   | Oral                        | Commercial              | Unclear | Google | Free                      | 100+    | None      | N/A        |
| MVR Cancer Centre                                 | MVR Cancer Centre and research institute, Calicut              | All                         | Healthcare organisation | India   | Google | Free                      | 100+    | 5 (5.0)   | N/A        |
| My breast cancer advocate                         | Pathways2healing.us                                            | Breast                      | Commercial              | USA     | Google | £1.22                     | 10+     | 3 (5.0)   | N/A        |
| My Cancer Coach                                   | Genomic health                                                 | Breast, prostate, and colon | Partnership             | USA     | Both   | Free                      | 10,000+ | 65 (4.4)  | Not enough |
| My Care Plan – cancer survivors                   | Journey forward                                                | All                         | Partnership             | USA     | Both   | Free                      | 500+    | 4 (4.0)   | Not enough |
| My Head & Neck Cancer Manager                     | point of care                                                  | Head and neck               | Commercial              | USA     | Apple  | Free                      | N/A     | N/A       | Not enough |



|                                           |                                                           |                     |                         |         |        |      |        |          |            |
|-------------------------------------------|-----------------------------------------------------------|---------------------|-------------------------|---------|--------|------|--------|----------|------------|
| My liver                                  | AGF studios Ltd for National Health Service               | Liver               | Healthcare organisation | UK      | Apple  | Free | N/A    | N/A      | 14 (5.0)   |
| My Pancreas                               | AGF studios Ltd for National Health Service               | Pancreatic          | Healthcare organisation | UK      | Apple  | Free | N/A    | N/A      | 7 (5.0)    |
| My Prostate Cancer Manager                | point of care                                             | Prostate            | Commercial              | USA     | Apple  | Free | N/A    | N/A      | Not enough |
| MyMSK                                     | Memorial Sloan-Kettering Cancer Center                    | All                 | Healthcare organisation | USA     | Both   | Free | 1,000+ | 4 (3.8)  | Not enough |
| NCCN Patient Guides for Cancer            | National Comprehensive Cancer Network                     | All                 | Charity                 | USA     | Both   | Free | 1,000+ | 4 (4.5)  | Not enough |
| NED for prostate cancer                   | University Health Network, Toronto                        | Prostate            | Academic                | Canada  | Both   | Free | 10+    | None     | Not enough |
| ONCompanion                               | ONCompanion foundation programmed by we builld technology | All                 | Charity                 | India   | Google | Free | 10+    | 3 (5.0)  | N/A        |
| OneRemission                              | OneRemission                                              | All                 | Commercial              | USA     | Apple  | Free | N/A    | N/A      | Not enough |
| Ovarian Cancer Symptoms Diary             | Ovarian Cancer Action (programmed by electric putty)      | Ovarian             | Charity                 | UK      | Both   | Free | 1,000+ | 7 (4.3)  | Not enough |
| OWise breast cancer                       | Px Healthcare B.V. Ldt                                    | Breast              | Commercial              | >1      | Both   | Free | 1,000+ | 10 (4.4) | Not enough |
| Oxford Cancer and Haematology Outpatients | Oxford University Hospitals NHS foundation                | All                 | Healthcare organisation | UK      | Apple  | Free | N/A    | N/A      | Not enough |
| Personalized sarcoma care                 | Mobile Pioneers BV                                        | Soft tissue sarcoma | Unclear                 | Unclear | Both   | Free | 100+   | 8 (4+)   | Not enough |
| Phil's friends                            | Phils friends organisation, developed by subsplash inc    | All                 | Charity                 | USA     | Both   | Free | 50+    | 1 (5.0)  | Not enough |
| PM Cancer Journey                         | University Health Network, Toronto                        | All                 | Partnership             | Canada  | Both   | Free | 500+   | 6 (4.8)  | Not enough |

|                                                 |                                                                          |                |                         |           |        |      |        |          |            |
|-------------------------------------------------|--------------------------------------------------------------------------|----------------|-------------------------|-----------|--------|------|--------|----------|------------|
| Pocket Cancer Care Guide                        | National Coalition for Cancer Survivorship                               | All            | Charity                 | USA       | Apple  | Free | N/A    | N/A      | Not enough |
| Pratheeksha                                     | Pratheeksha clinic                                                       | All            | Healthcare organisation | India     | Both   | Free | 100+   | 14 (4.8) | Not enough |
| Prostate cancer support group Gibraltar         | Prostate cancer support group, Gibraltar, developed by Alan Pereira      | Prostate       | Charity                 | Gibraltar | Apple  | Free | N/A    | N/A      | Not enough |
| Prostate cancer treatment                       | Creative live apps                                                       | Prostate       | Unclear                 | Unclear   | Google | Free | 10+    | None     | N/A        |
| Prostate cancer we have your back               | Infinite Monkeys LLC                                                     | Prostate       | Unclear                 | Unclear   | Apple  | Free | N/A    | N/A      | Not enough |
| Qigong for cancer healing and prevention        | Yang's Martial Arts Association Publication Center, Inc.                 | All            | Commercial              | USA       | Both   | Free | 100+   | None     | Not enough |
| Radiotherapy                                    | incroyable future for skin safety.com                                    | All            | Commercial              | Canada    | Google | Free | 50+    | None     | N/A        |
| RB-World App                                    | KinderAugenKrebsStiftung KAKS (Childrens' eye cancer foundation Germany_ | Retinoblastoma | Charity                 | Germany   | Both   | Free | 100+   | 2 (4+)   | Not enough |
| Safe and easy cancer/ Easy ways to treat cancer | 999 Apps Developer                                                       | All            | Unclear                 | Unclear   | Google | Free | 10+    | 1 (5.0)  | N/A        |
| SCICancer Clinical Trials                       | Stanford University                                                      | All            | Partnership             | USA       | Both   | Free | 100+   | None     | Not enough |
| Self Care During Cancer                         | Nearspace inc for genetech inc, anthem inc                               | All            | Partnership             | USA       | Both   | Free | 1,000+ | 6 (4.7)  | Not enough |
| Signs and symptoms breast cancer                | Built By Doctors Ltd                                                     | Breast         | Commercial              | USA       | Both   | Free | 100+   | None     | Not enough |
| Skin Cancer Manager                             | point of care                                                            | Skin           | Commercial              | USA       | Apple  | Free | N/A    | N/A      | Not enough |

|                                |                                            |            |                         |             |        |      |        |          |            |
|--------------------------------|--------------------------------------------|------------|-------------------------|-------------|--------|------|--------|----------|------------|
| Stupid Cancer                  | Gryt health for stupid cancer.org          | All        | Charity                 | USA         | Both   | Free | 1,000+ | 10 (3.9) | Not enough |
| Super food to fight for cancer | cyclonblast mobile apps                    | All        | Unclear                 | unclear     | Google | Free | 100+   | 3 (4.3)  | N/A        |
| Survivor care                  | University medical centre Groningen        | All        | Healthcare organisation | Netherlands | Apple  | Free | N/A    | N/A      | Not enough |
| SwiSupport – HealingMusic      | Jun-Wei Su                                 | All        | Commercial              | Unclear     | Apple  | Free | N/A    | N/A      | Not enough |
| T.I.N.A                        | Kognito                                    | All        | Partnership             | USA         | Both   | Free | 10+    | None     | Not enough |
| Testicular cancer              | Expert health studios                      | Testicular | Commercial              | unclear     | Google | Free | 5,000+ | 13 (3.8) | N/A        |
| Thrivor                        | thrivor pty ltd                            | All        | Commercial              | unclear     | Both   | Free | 100+   | 4 (5.0)  | Not enough |
| Treat prostate cancer          | martinandoappp                             | Prostate   | Commercial              | unclear     | Google | Free | 500+   | 1 (5.0)  | Not enough |
| Treating bladder cancer        | NonitaDev                                  | Bladder    | Unclear                 | unclear     | Google | Free | 50+    | None     | N/A        |
| Triple negative breast cancer  | Kognito                                    | Breast     | Partnership             | USA         | Both   | Free | 100+   | 1 (5.0)  | Not enough |
| Twist out cancer               | Rochishna Aloor                            | All        | Charity                 | >1          | Apple  | Free | N/A    | N/A      | Not enough |
| Types of cancer treatment      | Dinatale                                   | All        | Commercial              | Unclear     | Google | Free | 100+   | 2 (3.0)  | N/A        |
| Untire: Beating cancer fatigue | tired of cancer                            | All        | Charity                 | Netherlands | Both   | Free | 1,000+ | 43 (4.5) | Not enough |
| Various cancer cures           | EmirZIApps                                 | All        | Commercial              | unclear     | Google | Free | 500+   | 2 (3.0)  | N/A        |
| Ways to fight off cancer       | Koodalappz on android, sathish bc on apple | All        | Commercial              | unclear     | Both   | Free | 1,000+ | 3 (5.0)  | N/A        |

|                 |                 |     |            |       |        |      |     |      |            |
|-----------------|-----------------|-----|------------|-------|--------|------|-----|------|------------|
| Whip Cancer     | Copley Raff Inc | All | Commercial | USA   | Apple  | Free | N/A | N/A  | Not enough |
| Yoga vs. cancer | Antioch studio  | All | Commercial | Spain | Google | Free | 10+ | None | N/A        |

\*The nature of the owner and country of origin was open to a degree of interpretation/judgement by the authors, and therefore we involved two authors in extracting this data independently. Linked websites were visited. There were high levels of agreement and we reached consensus by discussion. We have applied the term “charity” to cover non-profit organisations.

\$Google Play will publish a “star” rating when there is one or more reviews of the app. Many of the apps available via Apple’s app store reported that there were not enough reviews to present a star rating. Ratings were accurate to November 2018.
